# Supplementary material for: Design, microwave-assisted synthesis, bioactivity and SAR of novel substituted 2-phenyl-2-cyclohexanedione enol ester derivatives
Source: Royal Society of Chemistry journal article supplement (doi:10.1039/c8ra02647e), 2018-01-01
Supplement: c8ra02647e1.pdf [file c8ra02647e1.pdf]

**Design, Microwave-assistant Synthesis, Bioactivity and SAR of Novel**

**Substituted 2-Phenyl-2-Cyclohexanedione Enol Ester Derivatives**

Fei Ye, Peng Ma, Yue Zhai, Fei Yang, Shuang Gao, Li-Xia Zhao, Ying Fu\*

**Supporting information**

### 3-Hydroxy -2-phenylcyclohex-2-en-1-one (2a)

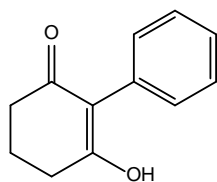

$C_{12}H_{12}O_2$

IR

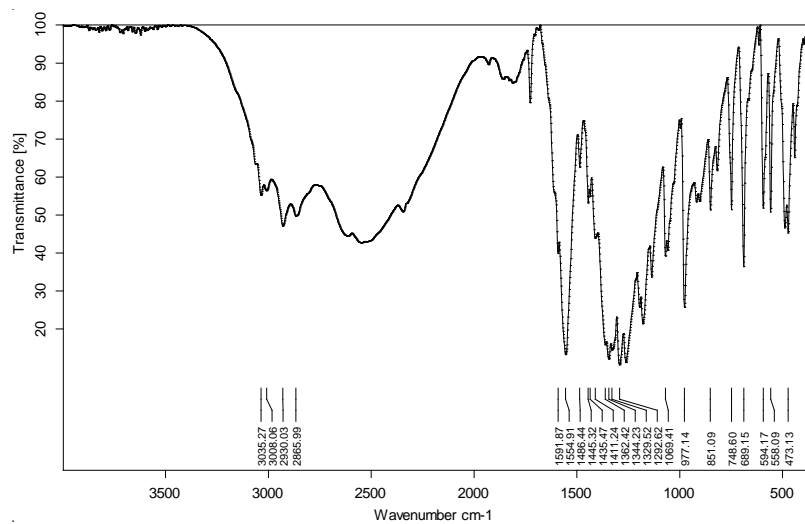

|                           |                    |                                    |            |
|---------------------------|--------------------|------------------------------------|------------|
| F:\Sample description.153 | Sample description | Instrument type and / or accessory | 21/04/2018 |
|---------------------------|--------------------|------------------------------------|------------|

Page 1/1

$^1H$  NMR

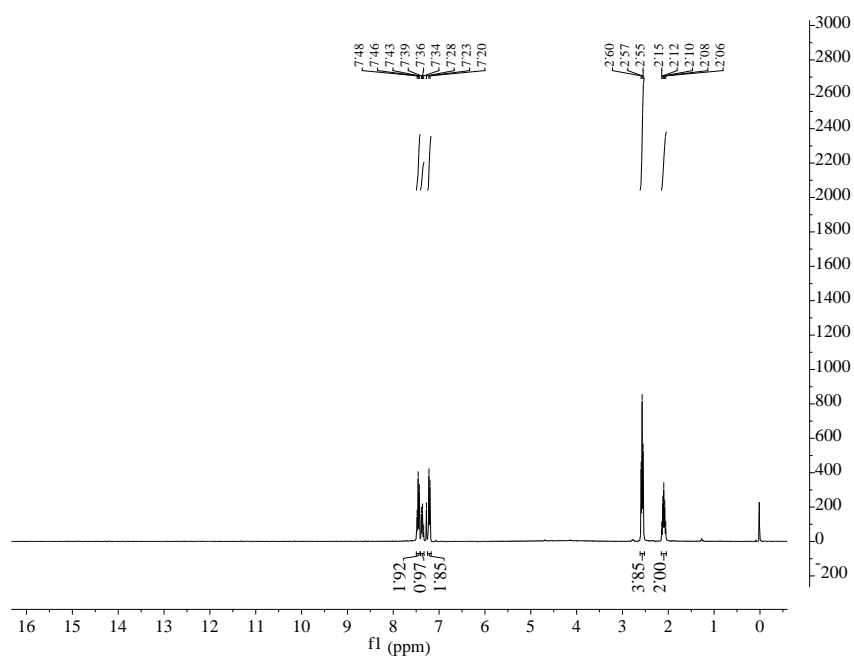

# <sup>13</sup>C NMR

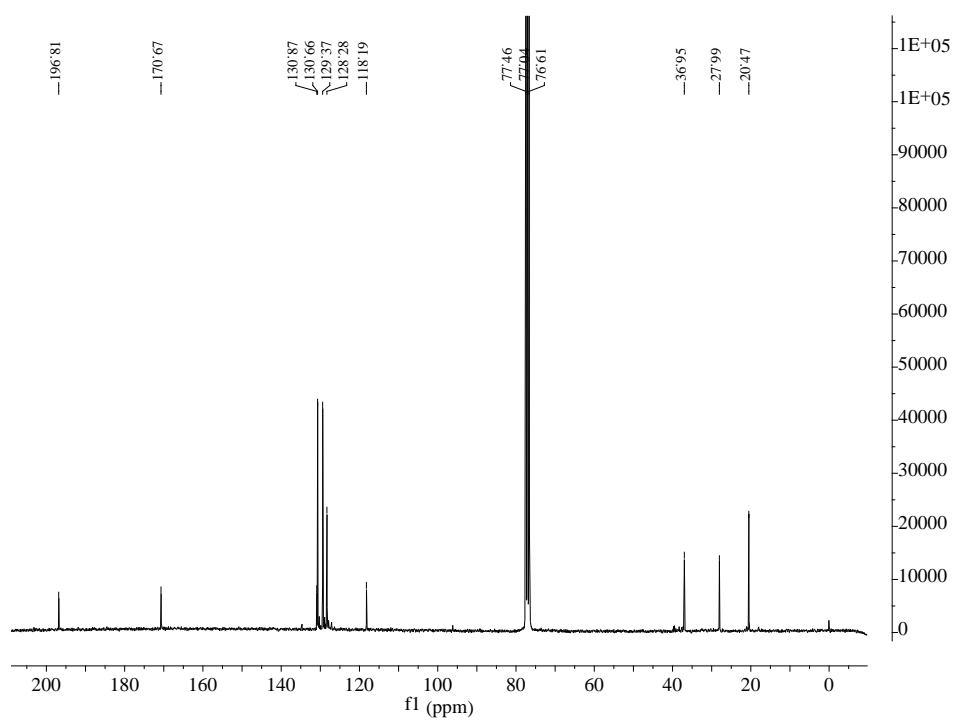

### 3-Hydroxy-5-methyl-2-phenylcyclohex-2-en-1-one (2b)

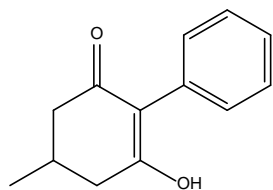

$C_{13}H_{14}O_2$

IR

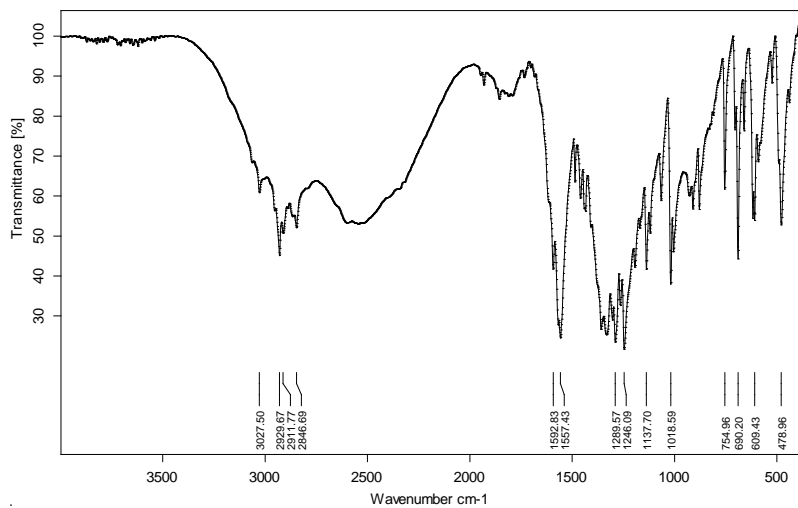

$^1H$  NMR

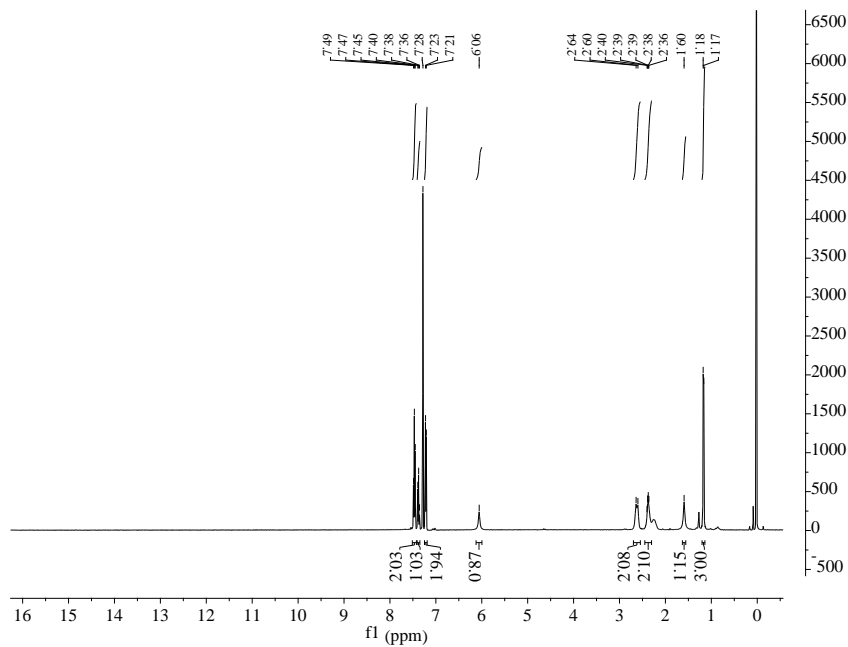

# <sup>13</sup>C NMR

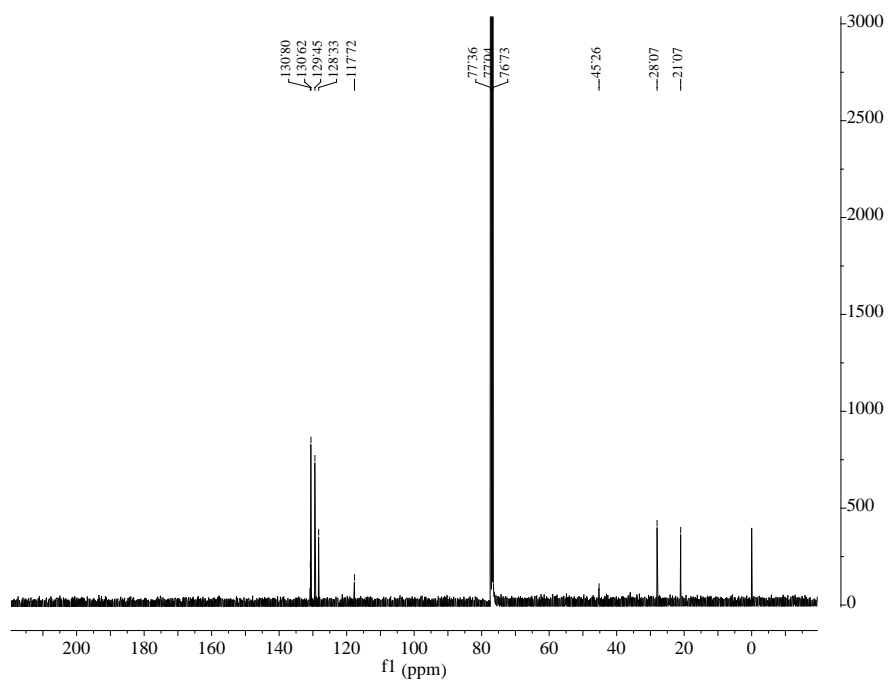

### 3-Hydroxy-5,5-dimethyl-2-phenylcyclohex-2-en-1-one (2c)

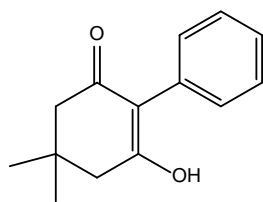

$C_{14}H_{16}O_2$

IR

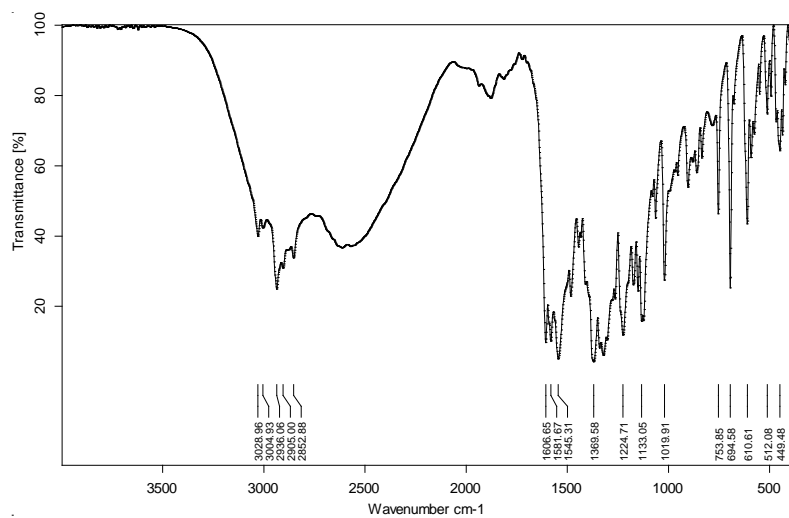

$^1H$  NMR

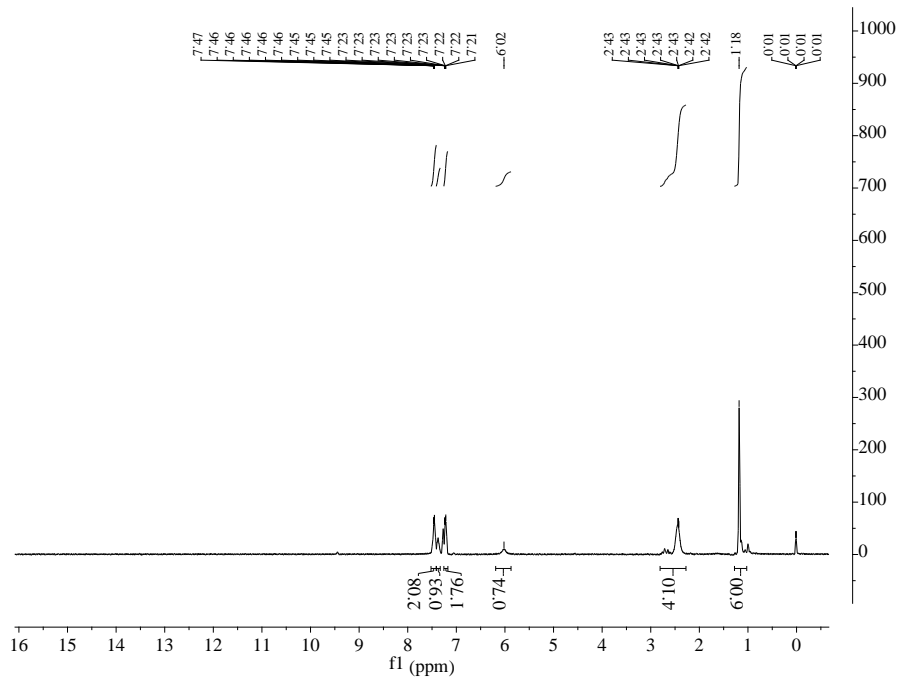

# <sup>13</sup>C NMR

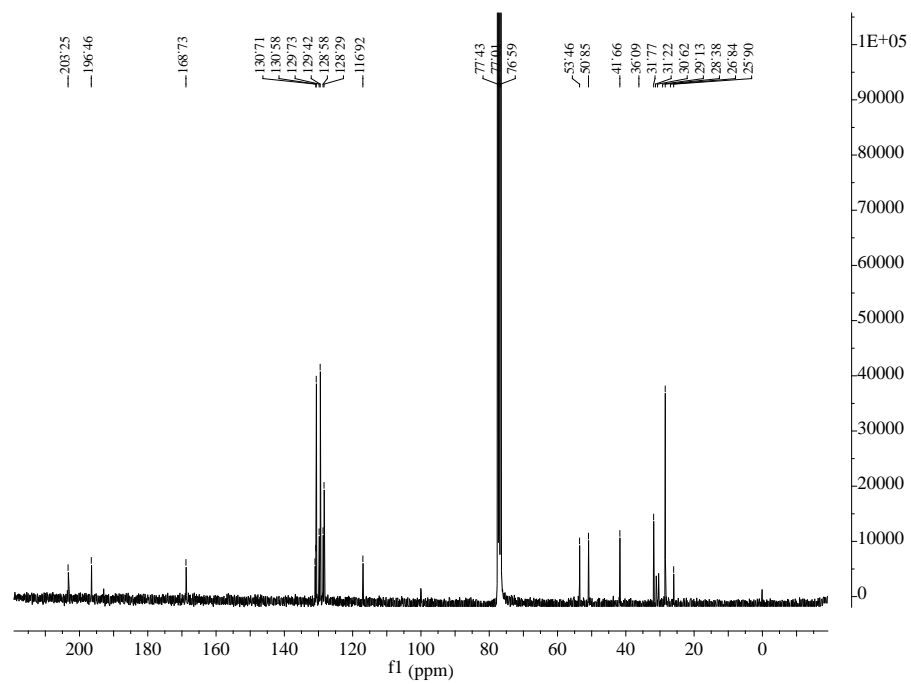

### 3-(Benzoyloxy)-2-phenyl-2-cyclohexen-1-one (S1)

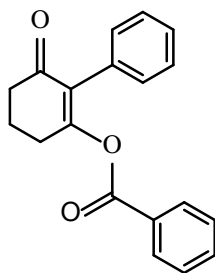

$C_{19}H_{16}O_3$

IR

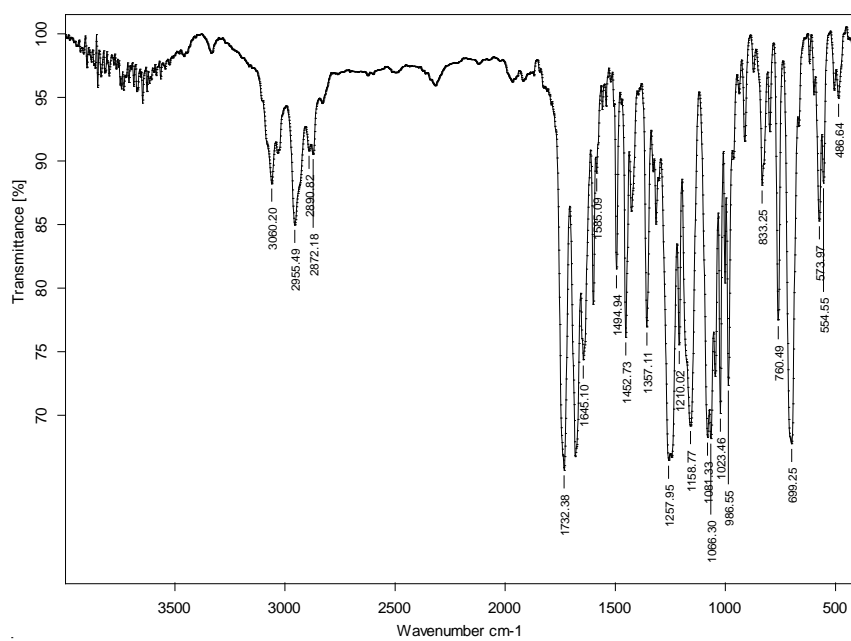

$^1H$  NMR

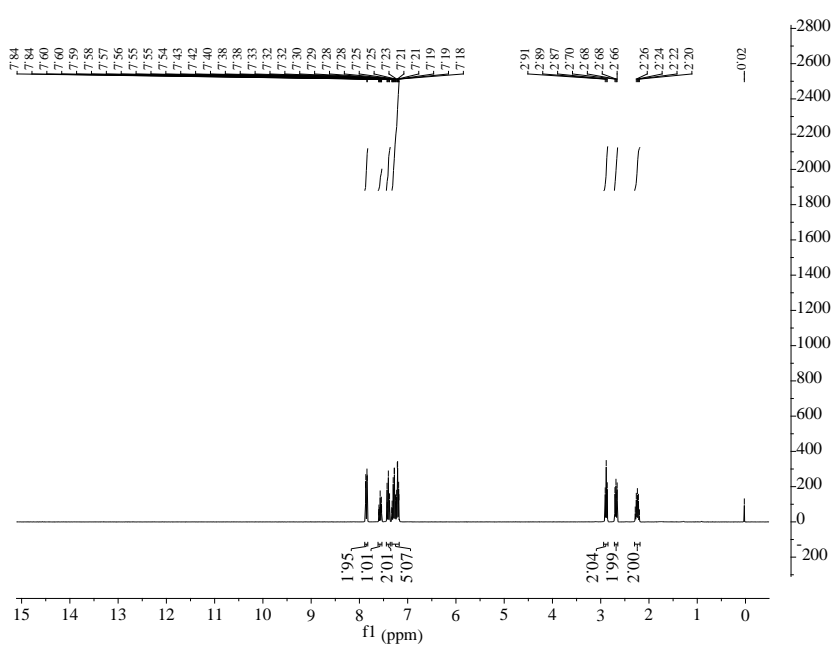



# <sup>13</sup>C NMR

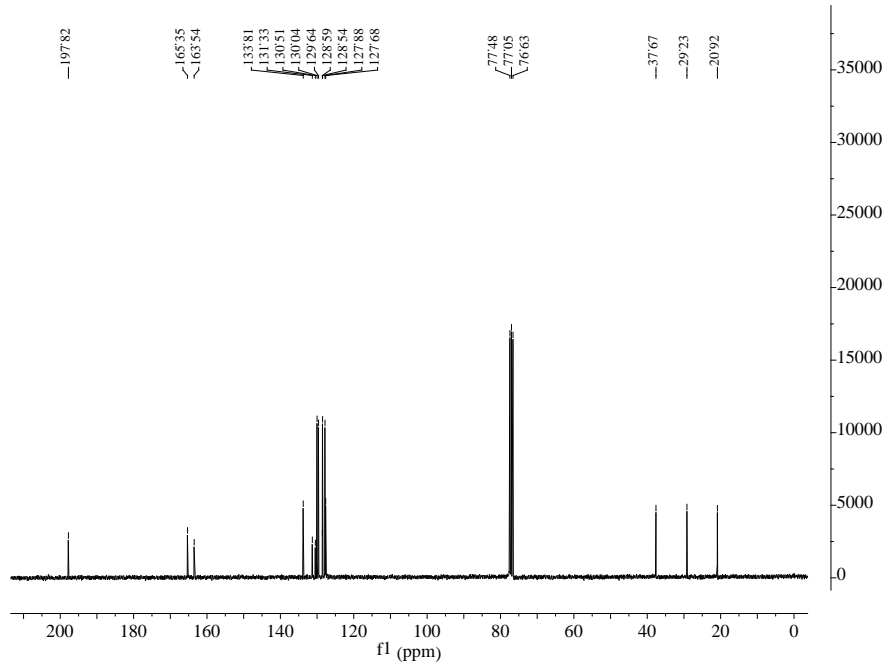

# HRMS

F:\Users\...fuying-31\_160330212339

3/30/2016 9:37:46 PM  
Error=0.7 ppm

31#

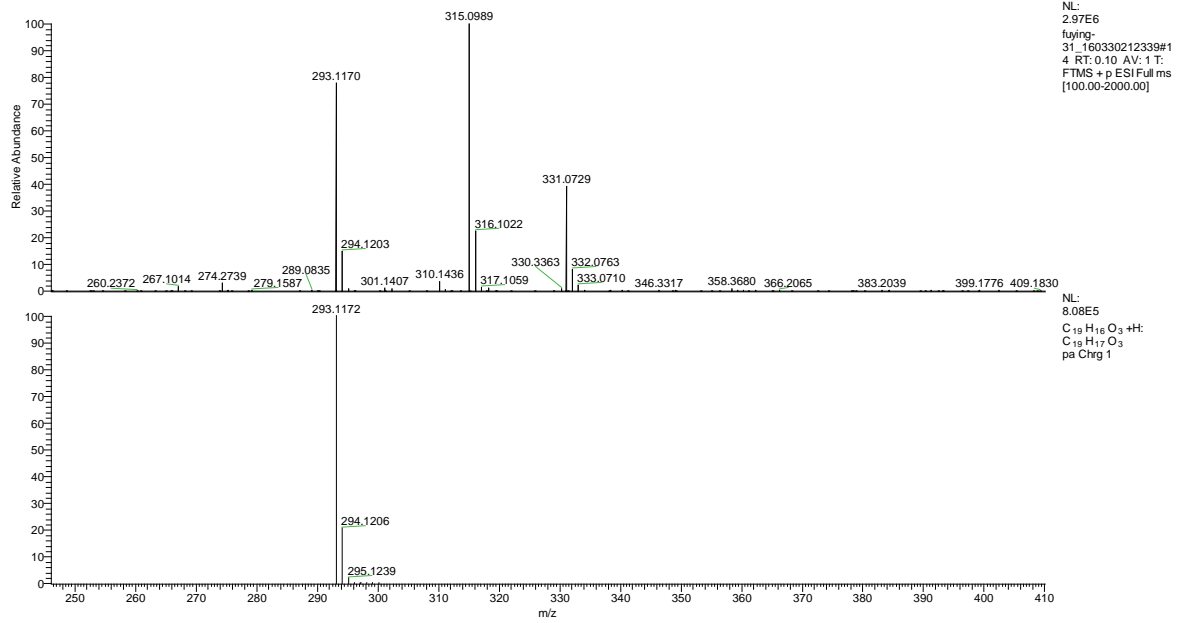

### 3-(Benzoyloxy)-2-phenyl-5-methyl-2-cyclohexen-1-one (S2)

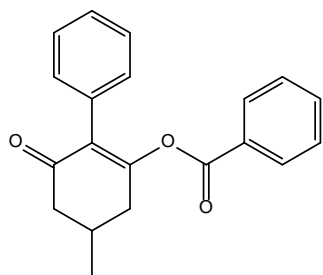

$C_{20}H_{18}O_3$

IR

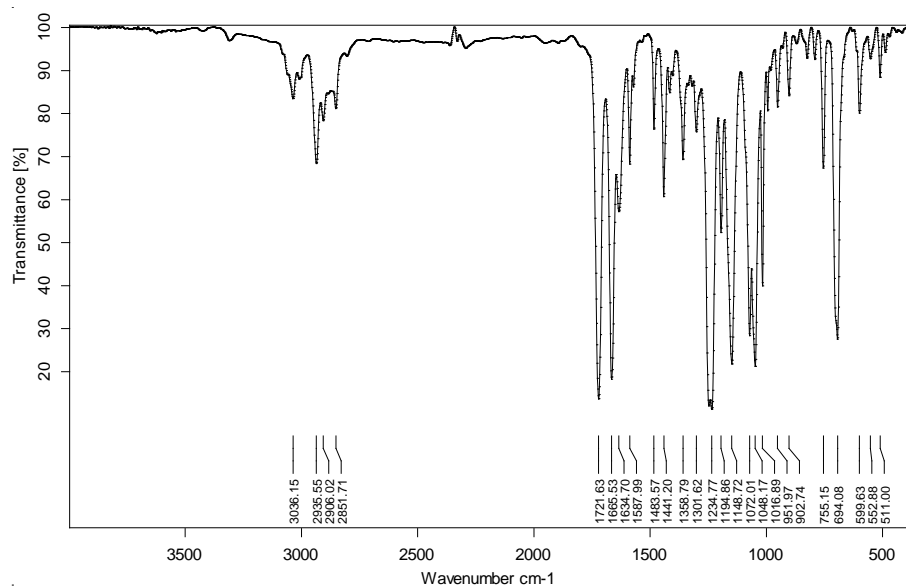

C:\Program Files\OPUS\_65\MEAS\Sample description.12    Sample description    Instrument type and / or accessory    02/12/2016

Page 1/1

$^1H$  NMR

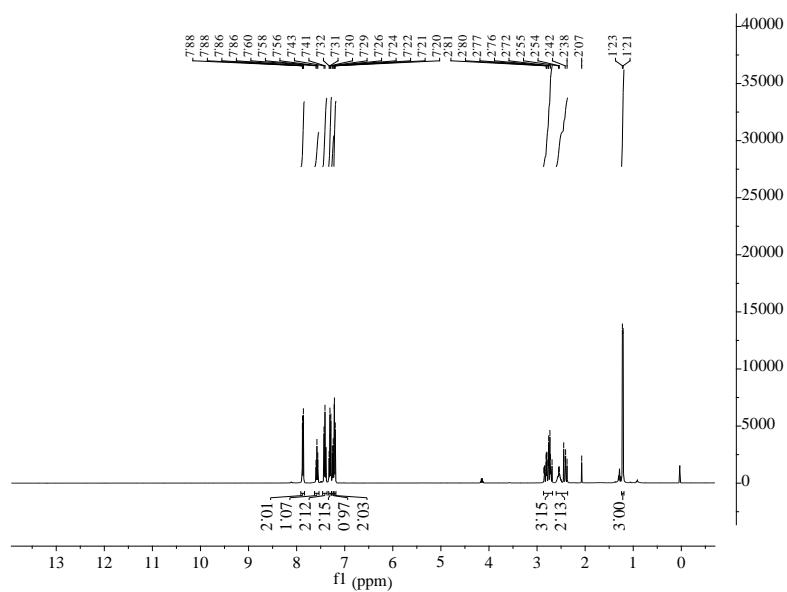

# <sup>13</sup>C NMR

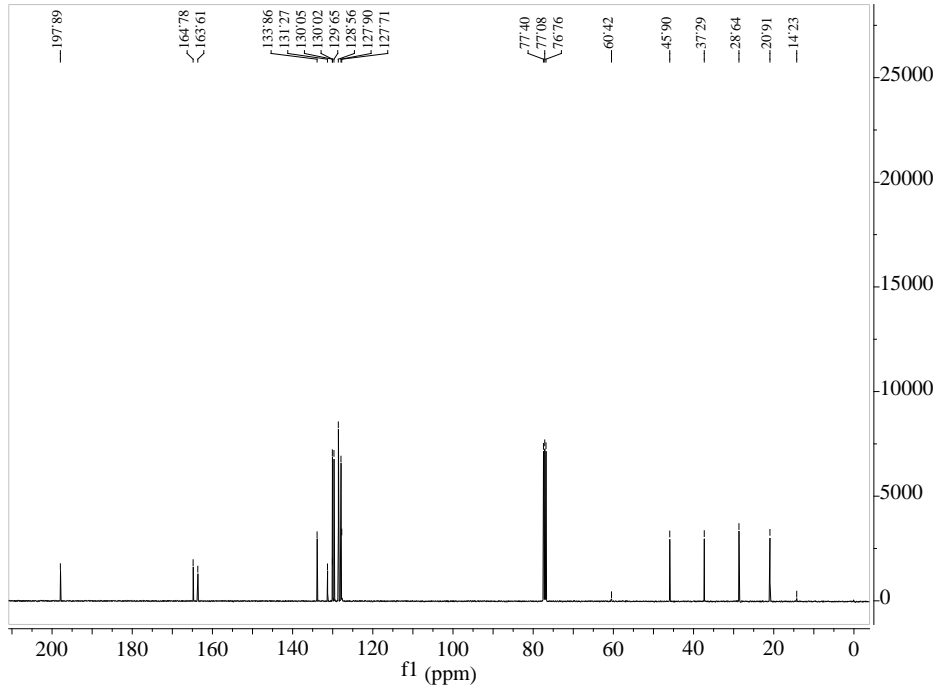

# HRMS

F:\Users\...fuying-12\_170105220107

1/5/2017 10:28:16 PM  
Error=0.6 ppm

12#

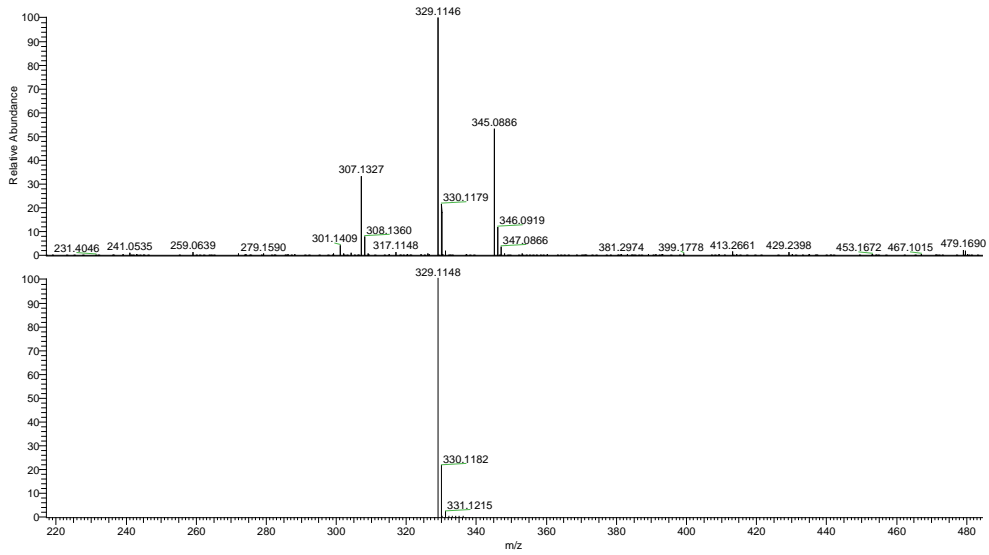

NL:  
5.63E6  
fuying-  
12\_170105220107#5  
RT: 0.03 AV: 1 T:  
FTMS + p ESI Full  
ms [100.00-2000.00]

NL:  
7.99E5  
C<sub>20</sub>H<sub>18</sub>O<sub>3</sub> +Na:  
C<sub>20</sub>H<sub>18</sub>O<sub>3</sub>Na<sub>1</sub>  
pa Chrg 1

### 3-(Benzoyloxy)-2-phenyl-5,5-dimethyl-2-cyclohexen-1-one (S3)

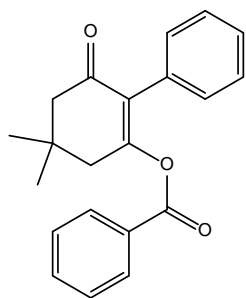

$C_{21}H_{20}O_3$

IR

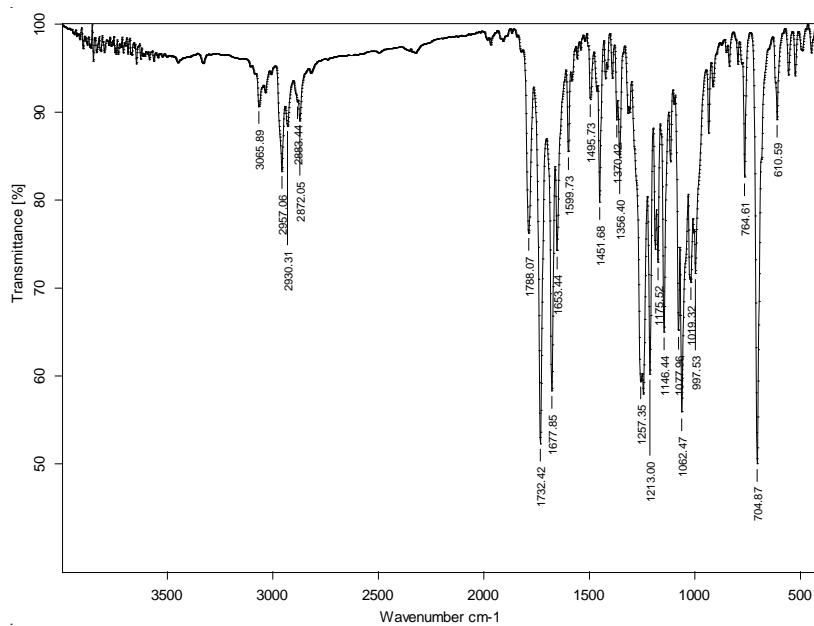

$^1H$  NMR

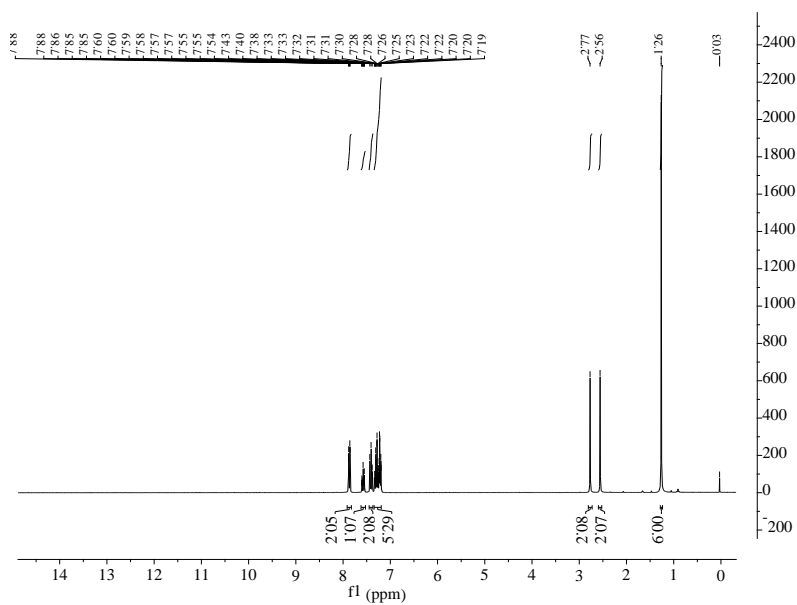

# <sup>13</sup>C NMR

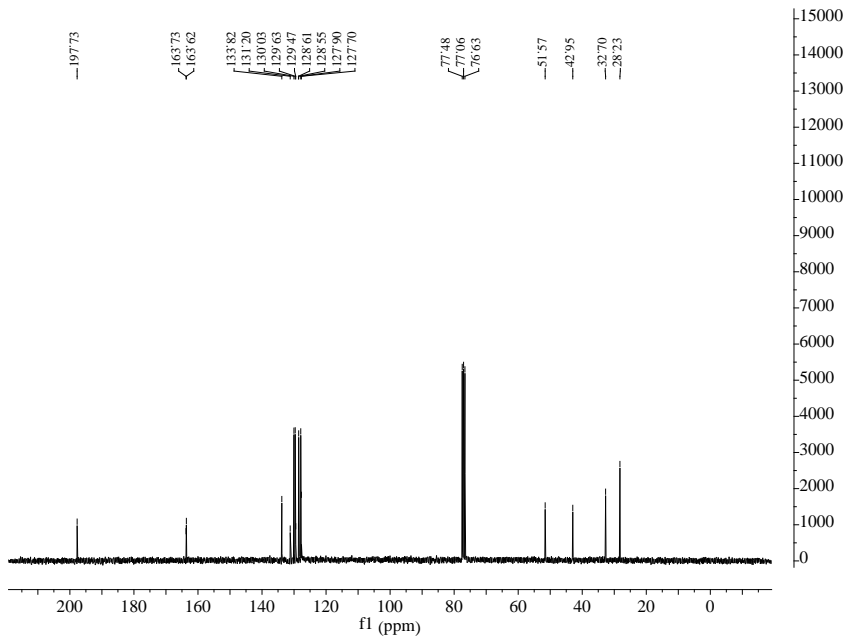

# HRMS

F:\Users\...uying-34\_160330212339

3/30/2016 9:53:18 PM  
Error=0.6 ppm

34#

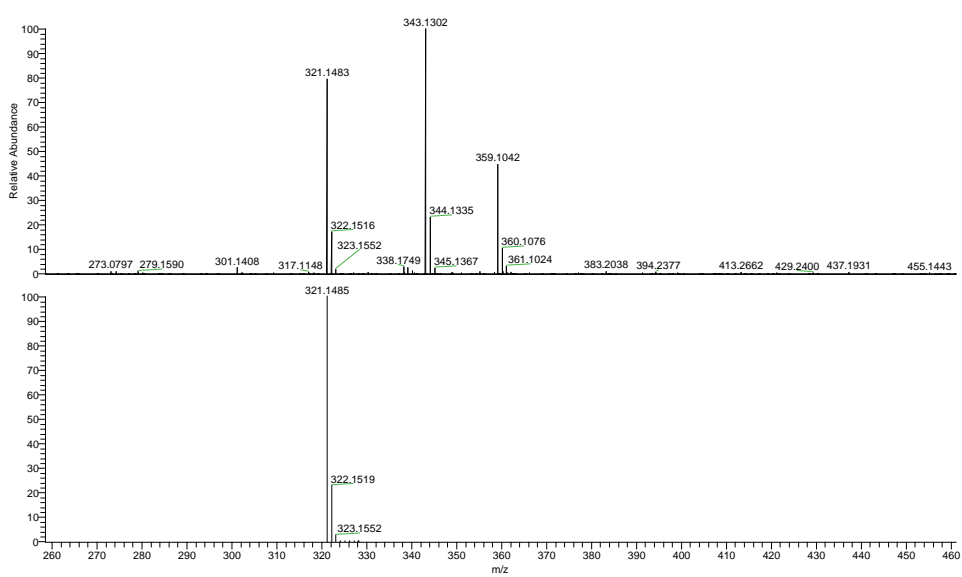

NL:  
3.02E6  
fuying-  
34\_160330212339#2  
0 RT: 0.15 AV: 1 T:  
FTMS + p ESIFull.ms  
[100.00-2000.00]

NL:  
7.90E5  
C<sub>21</sub>H<sub>20</sub>O<sub>3</sub>+H  
C<sub>21</sub>H<sub>21</sub>O<sub>3</sub>  
p8 Chg 1

### 3-(2,4-Dichlorobenzoyloxy)-2-phenyl-2-cyclohexen-1-one (S4)

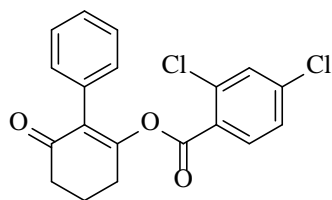

$C_{19}H_{14}Cl_2O_3$

IR

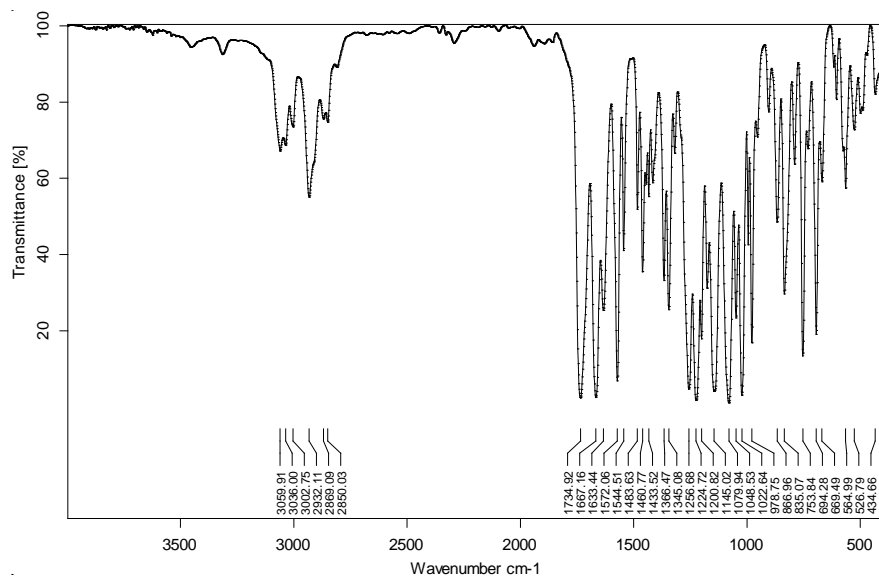

|                                                     |                    |                                    |            |
|-----------------------------------------------------|--------------------|------------------------------------|------------|
| C:\Program Files\OPUS_65\MEAS\Sample description.11 | Sample description | Instrument type and / or accessory | 02/12/2016 |
|-----------------------------------------------------|--------------------|------------------------------------|------------|

Page 1/1

$^1H$  NMR

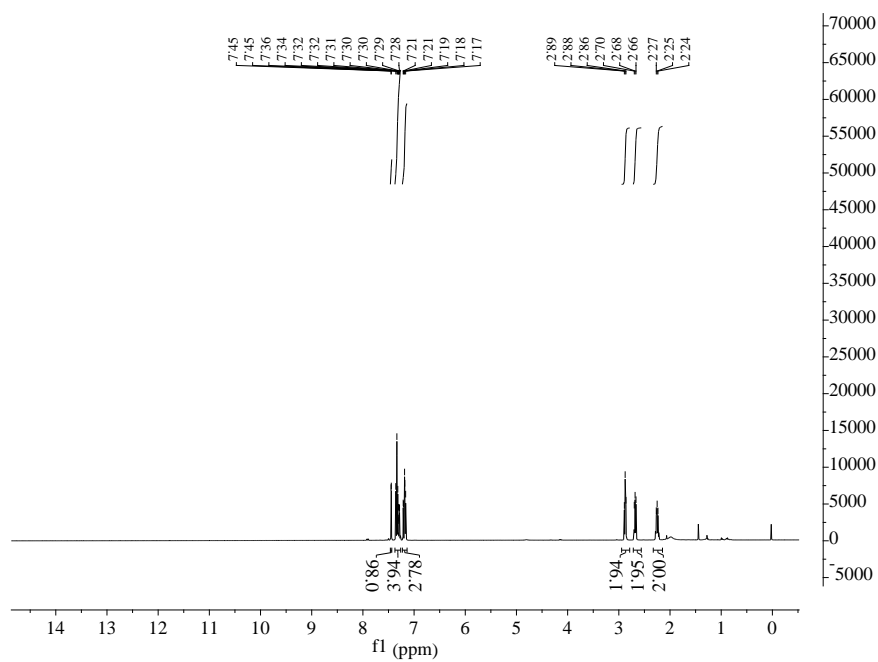

# <sup>13</sup>C NMR

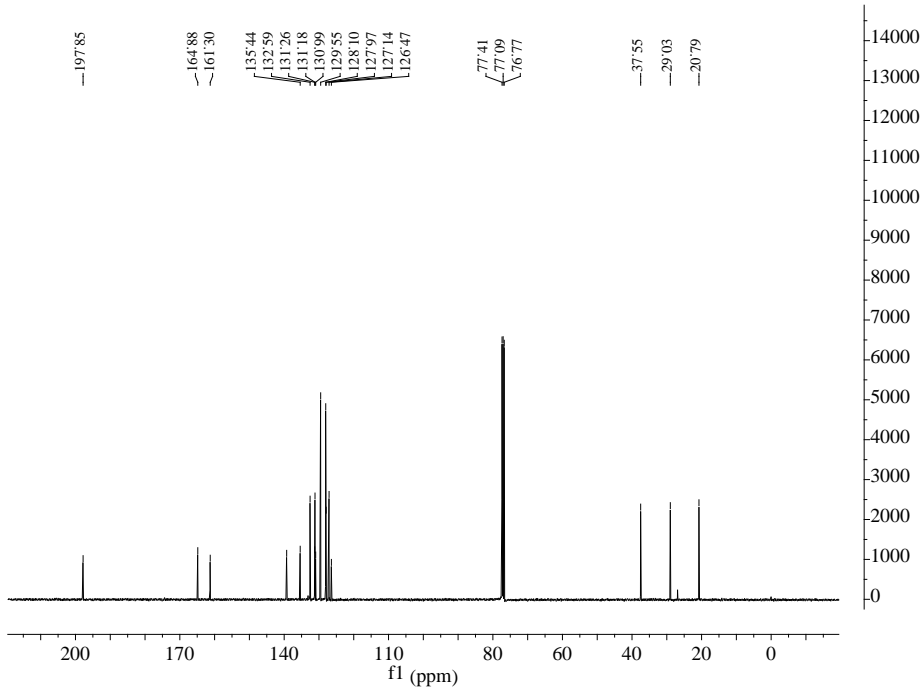

# HRMS

F:\Users\... \Muying-8\_170105220107

15/2017 10:06:23 PM  
Error=0.5 ppm

8#

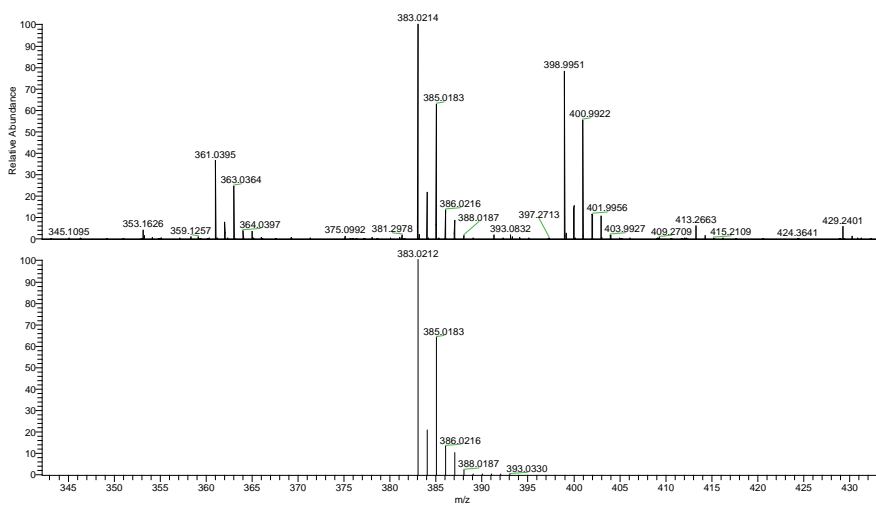

NL: 2.21E6  
Muying-8\_170105220107#16  
RT: 0.11 AV: 1 T:  
FTMS + p ESI Full ms  
[100.00-2000.00]

NL: 4.64E5  
C<sub>19</sub>H<sub>14</sub>Cl<sub>2</sub>O<sub>3</sub>+Na:  
C<sub>19</sub>H<sub>14</sub>Cl<sub>2</sub>O<sub>3</sub> Na:  
pa Chrg 1

### 3-(2,4-Dichlorobenzoyloxy)-2-phenyl-5-methyl-2-cyclohexen-1-one (S5)

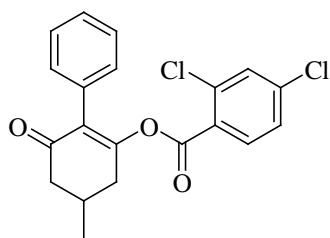

$C_{20}H_{16}Cl_2O_3$

IR

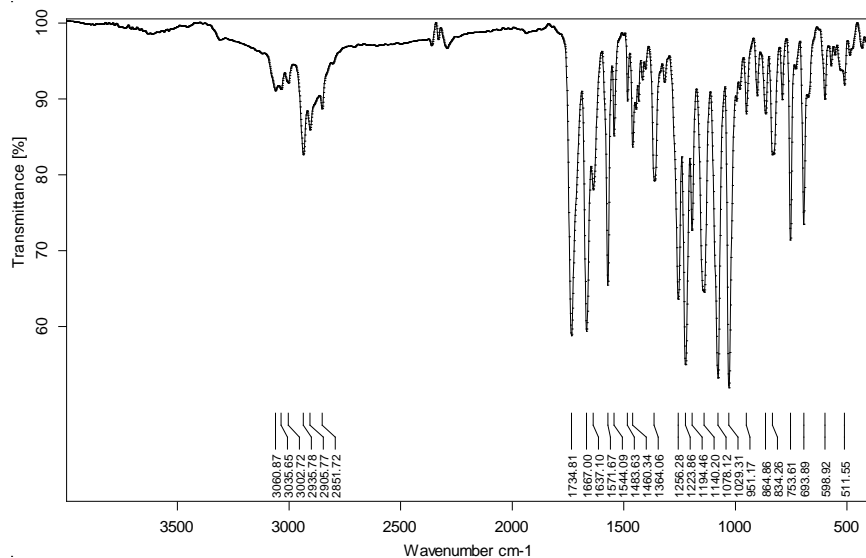

C:\Program Files\OPUS\_65\MEAS\Sample description.13    Sample description    Instrument type and / or accessory    02/12/2016

Page 1/1

### <sup>1</sup>H NMR

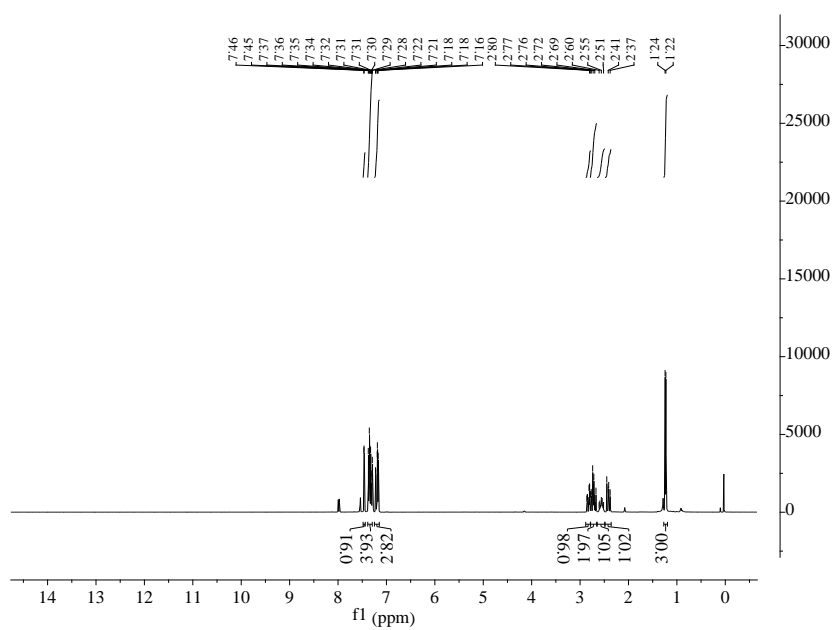



# <sup>13</sup>C NMR

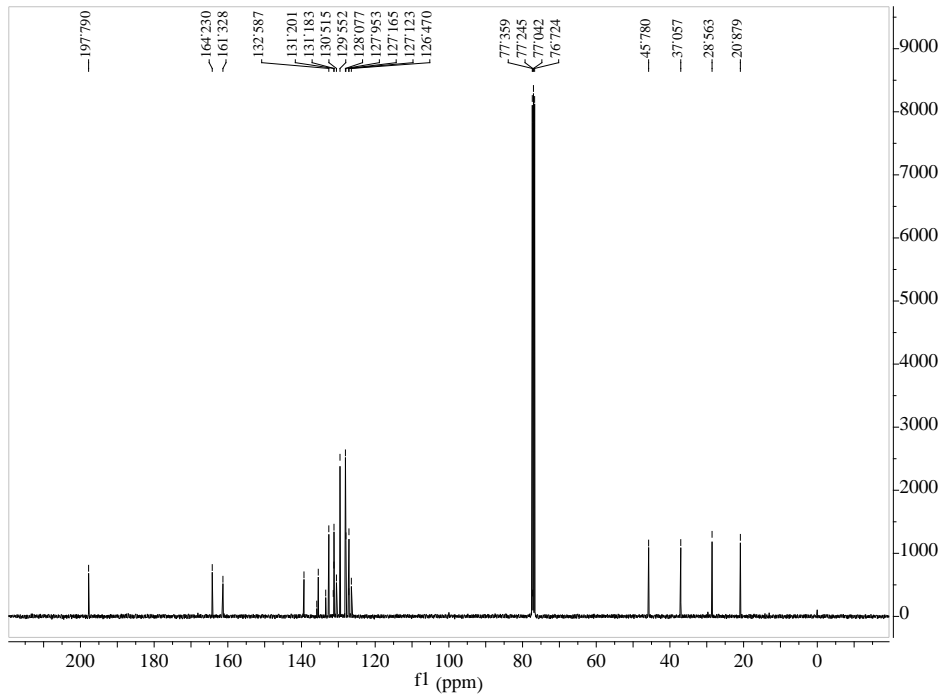

# HRMS

F:\Users\... \vuying-9\_170105220107

1/5/2017 10:12:17 PM  
Error=0.8 ppm

9#

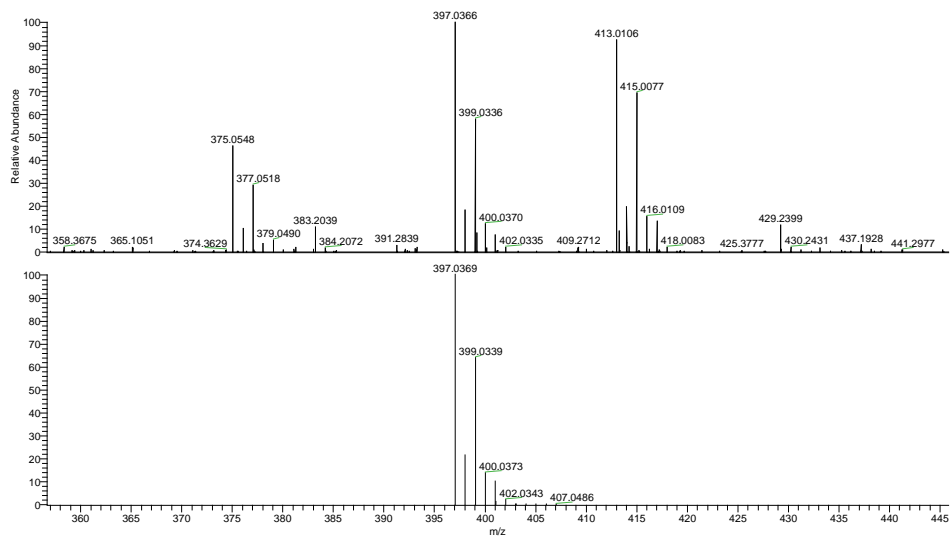

NL:  
1.08E6  
fuying-  
9\_170105220107#9  
RT: 0.06 AV: 1 T:  
FTMS + p ESI Full ms  
[100.00-2000.00]

NL:  
4.59E5  
C<sub>20</sub>H<sub>16</sub>Cl<sub>2</sub>O<sub>3</sub>+Na:  
C<sub>20</sub>H<sub>16</sub>Cl<sub>2</sub>O<sub>3</sub>Na:  
pa Chrg 1

**3-(2,4-Dichlorobenzoyloxy)-2-phenyl-5,5-dimethyl-2-cyclohexen-1-one (S6):**

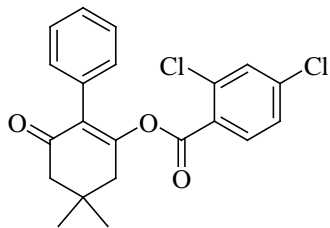

**C<sub>21</sub>H<sub>18</sub>Cl<sub>2</sub>O<sub>3</sub>**

**IR**

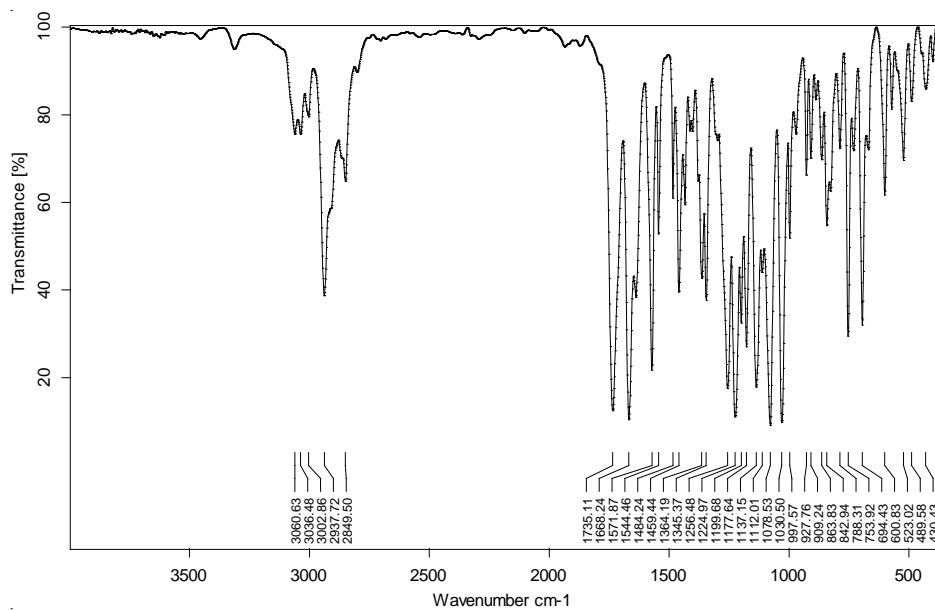

|                                                    |                    |                                    |            |
|----------------------------------------------------|--------------------|------------------------------------|------------|
| C:\Program Files\OPUS_65\MEAS\Sample description.5 | Sample description | Instrument type and / or accessory | 02/12/2016 |
|----------------------------------------------------|--------------------|------------------------------------|------------|

Page 1/1

**<sup>1</sup>H NMR**

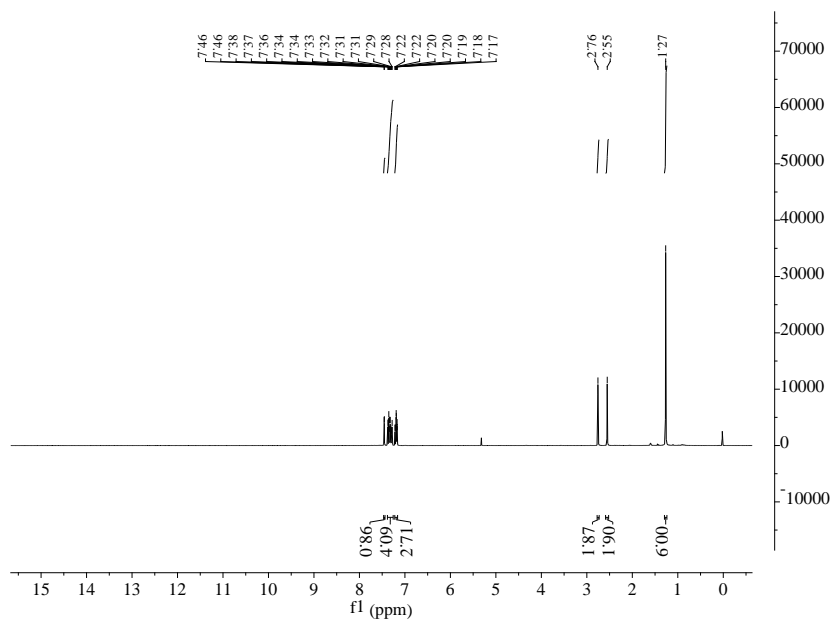

# <sup>13</sup>C NMR

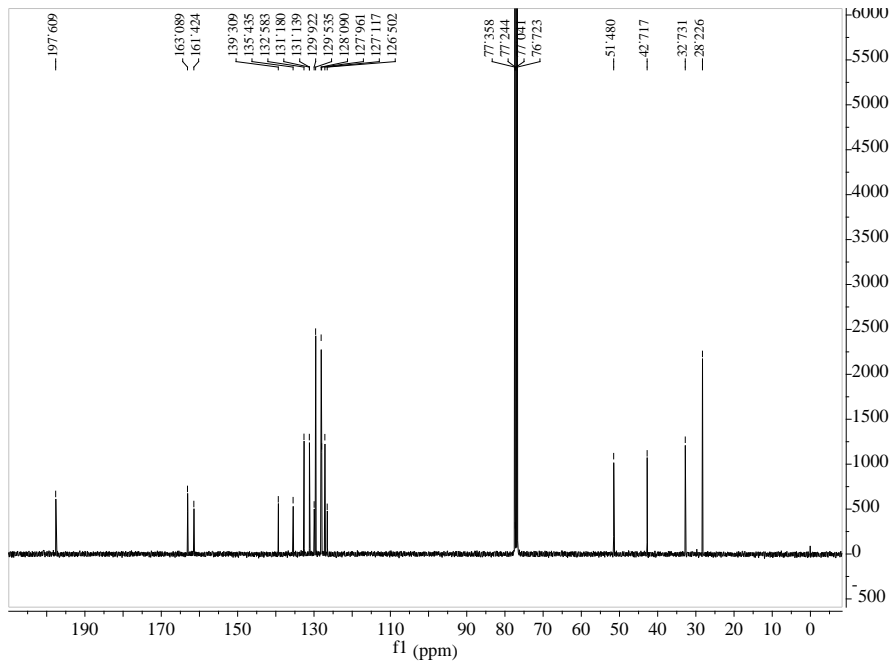

# HRMS

F:\Users\...uying-10\_170105220107 1/5/2017 10:16:55 PM 10#  
Error=0.7 ppm

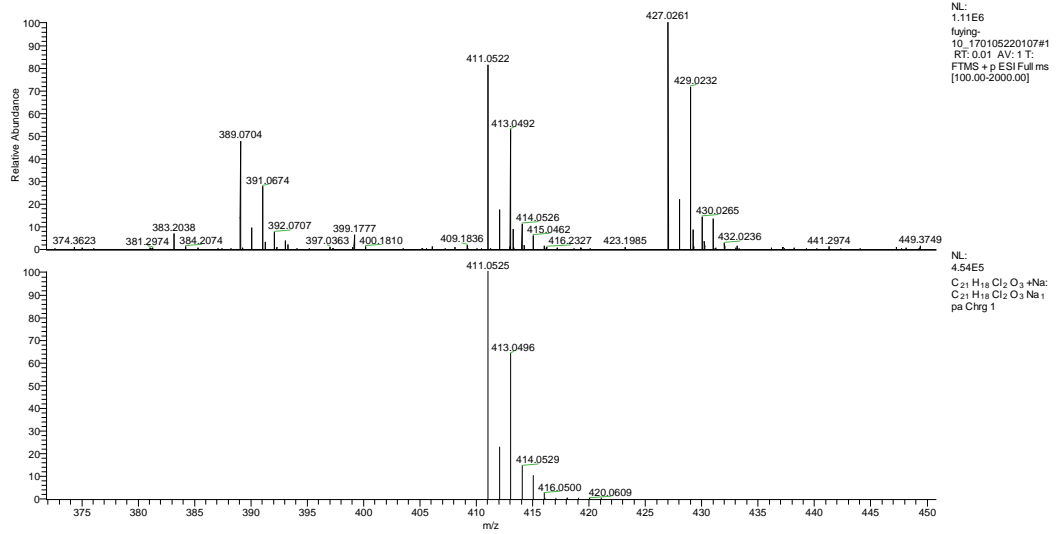

### 3-(Chloroacetoxy)-2-phenyl-5-methyl-2-cyclohexen-1-one (S7)

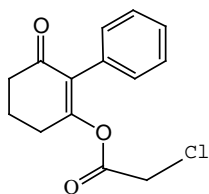

$C_{14}H_{13}ClO_3$

IR

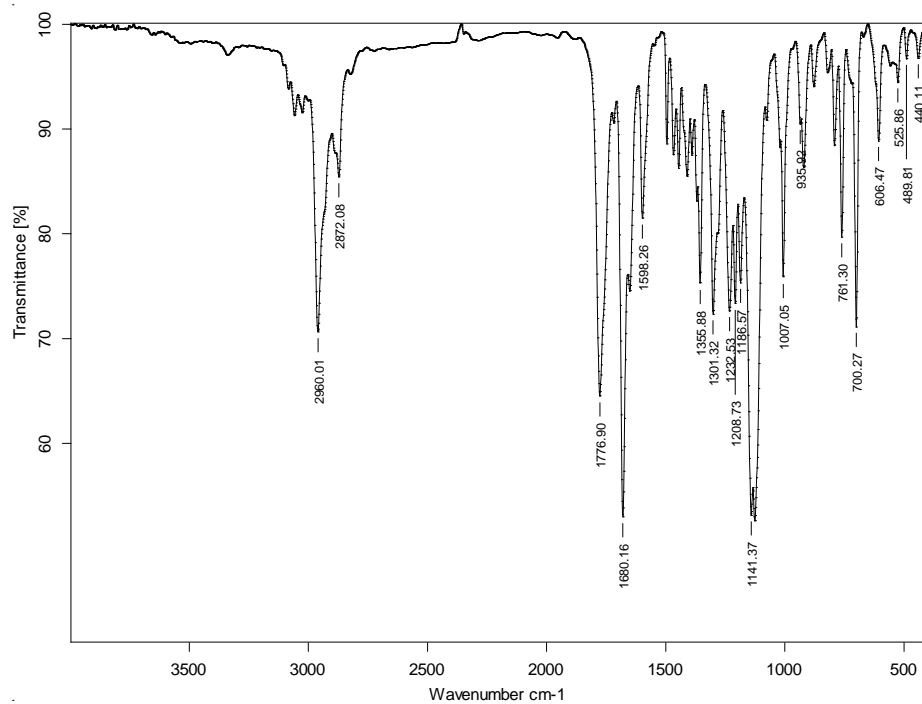

$^1H$  NMR

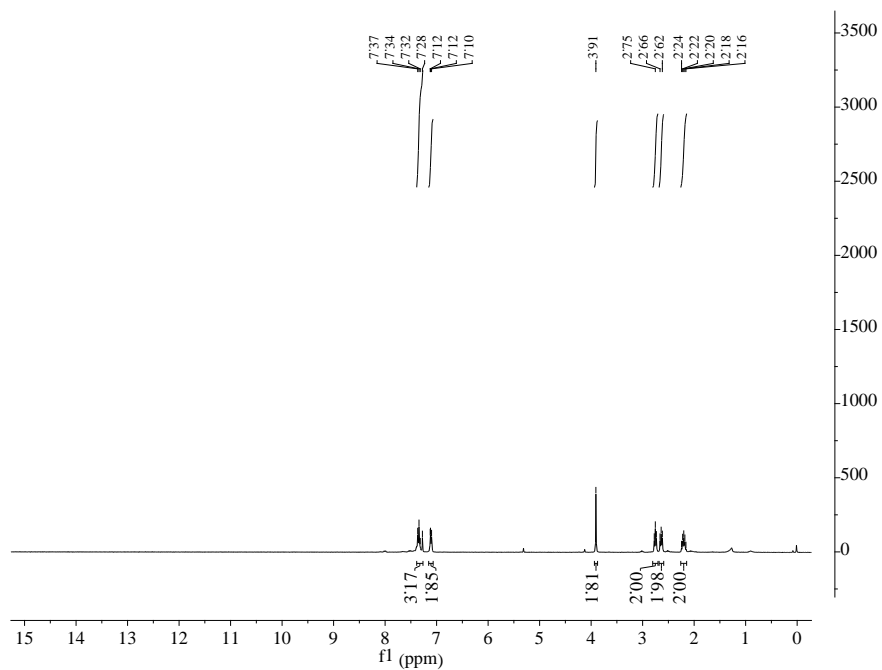

# <sup>13</sup>C NMR

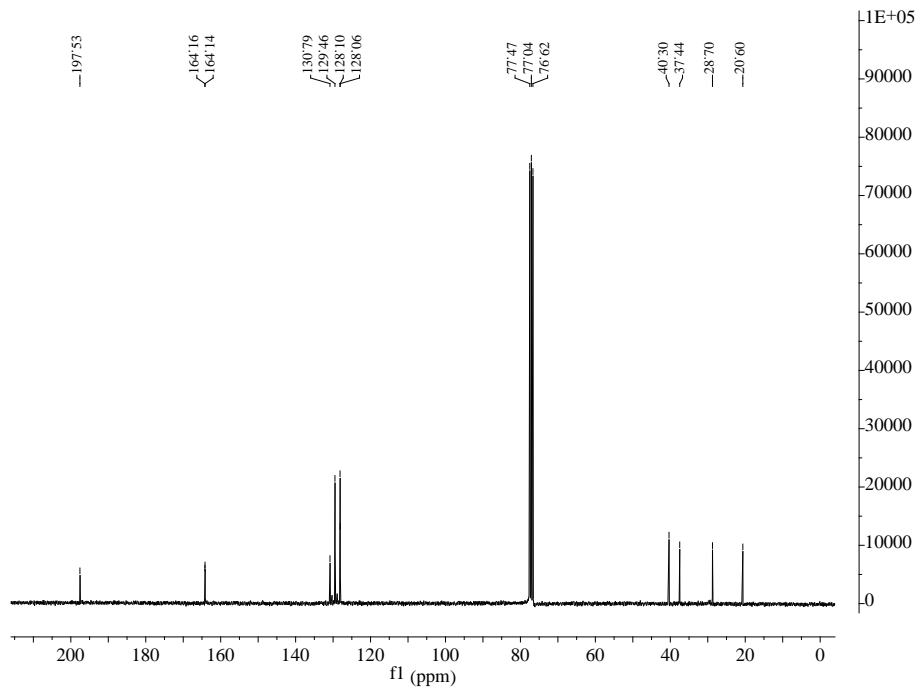

# HRMS

F:\Users\...uying-63\_160331212500

4/1/2016 9:53:22 AM  
Error=1.5 ppm

63#

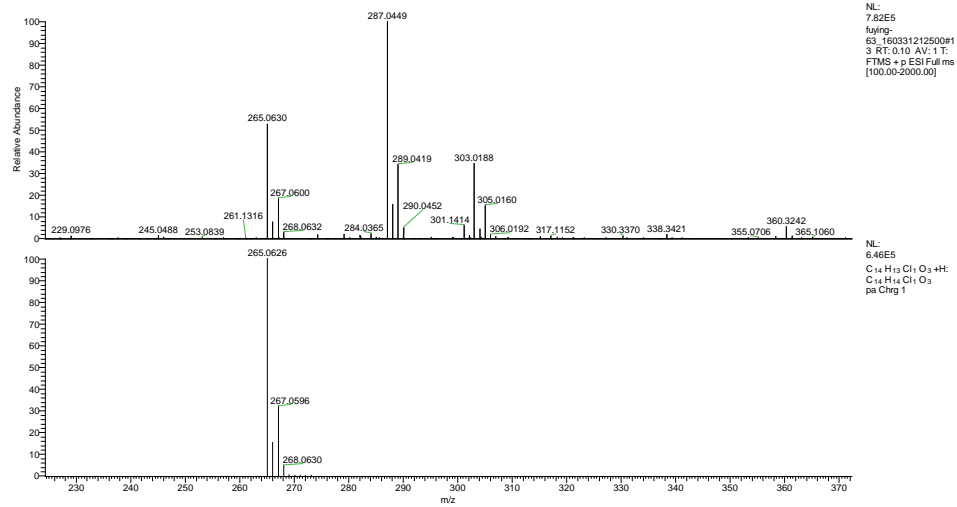

### 3-(Chloroacetyloxy)-2-phenyl-5-methyl-2-cyclohexen-1-one (S8)

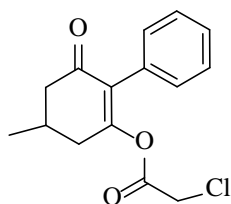

$C_{15}H_{15}ClO_3$

IR

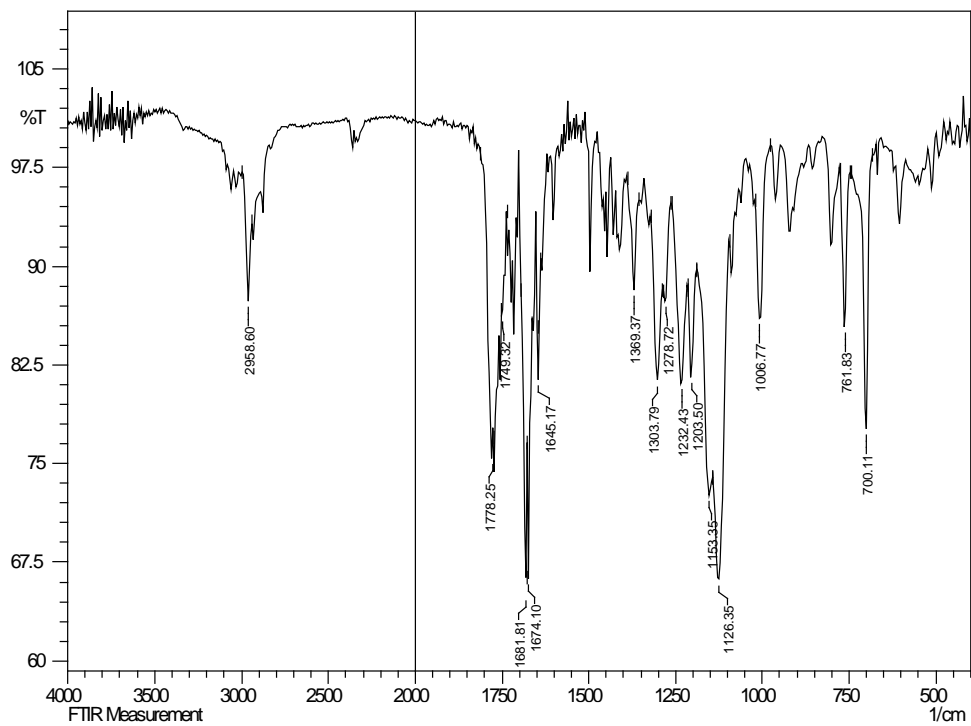

$^1H$  NMR

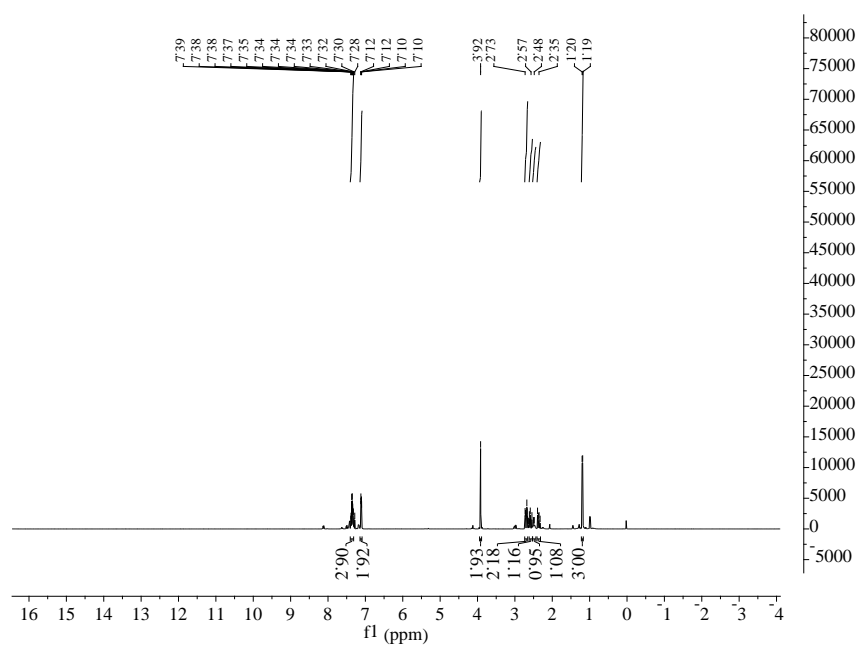

# <sup>13</sup>C NMR

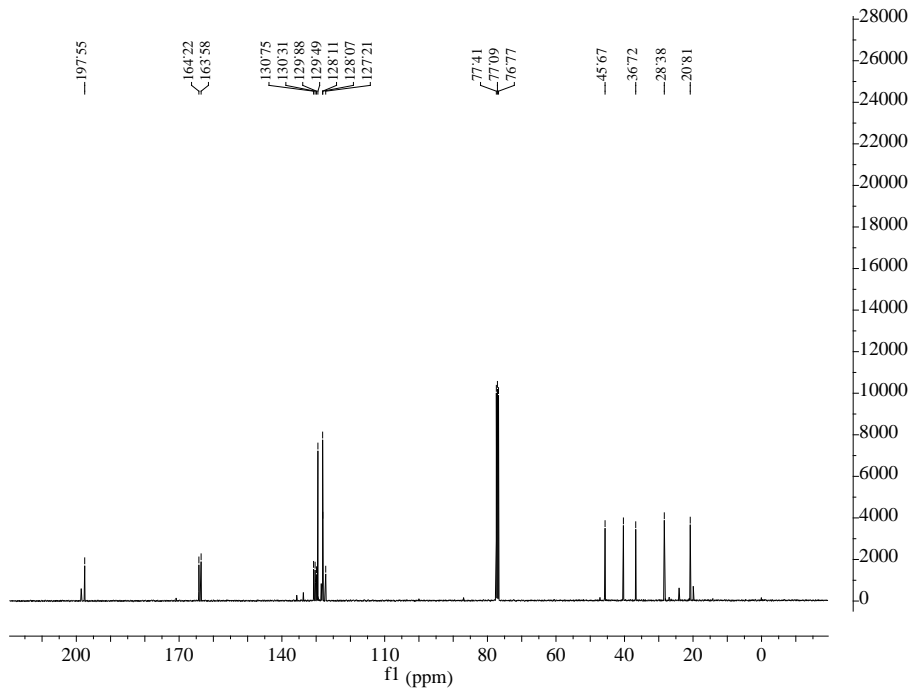

# HRMS

F:\Users\... \uying-11\_170105220107

1/5/2017 10:23:15 PM  
Error=0.7 ppm

11#

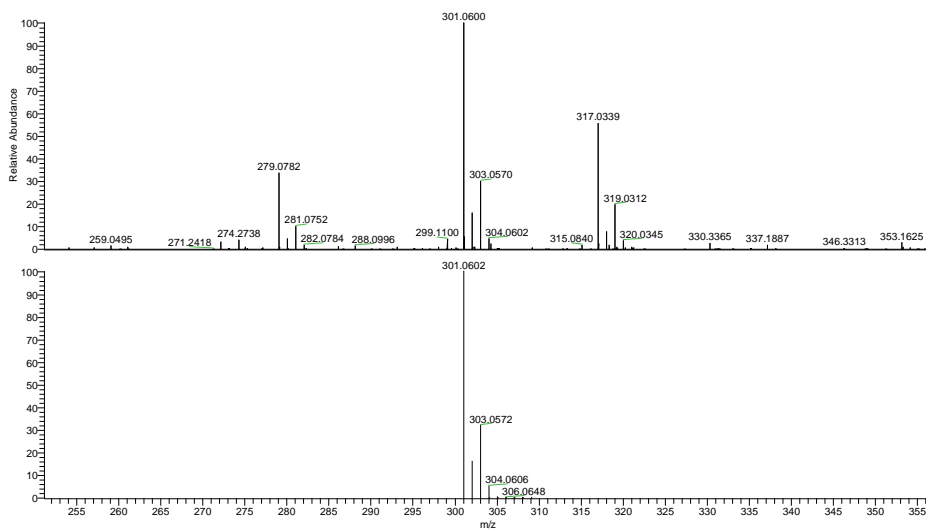

NL:  
2.53E6  
fuying-  
11\_170105220107#1  
7 RT: 0.12 AV: 1 T:  
FTMS + p ESI Full ms  
[100.00-2000.00]

NL:  
6.39E5  
C<sub>15</sub>H<sub>15</sub>Cl<sub>1</sub>O<sub>3</sub>+Na:  
C<sub>15</sub>H<sub>15</sub>Cl<sub>1</sub>O<sub>3</sub>Na:  
pa C1rg 1

### 3-(Chloroacetoxy)-2-phenyl-5,5-dimethyl-2-cyclohexen-1-one (S9)

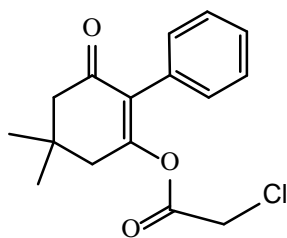

$C_{16}H_{17}ClO_3$

IR

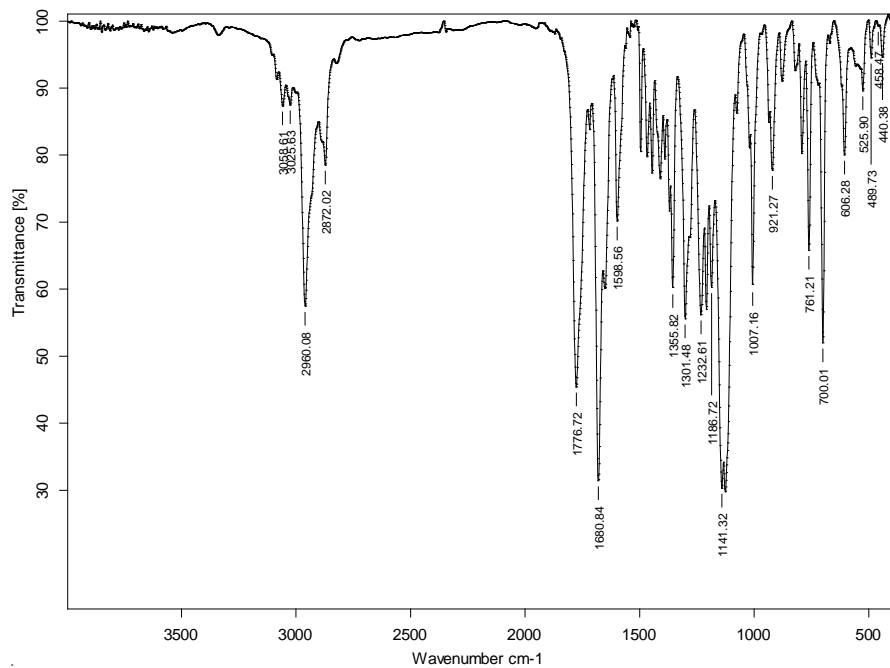

$^1H$  NMR

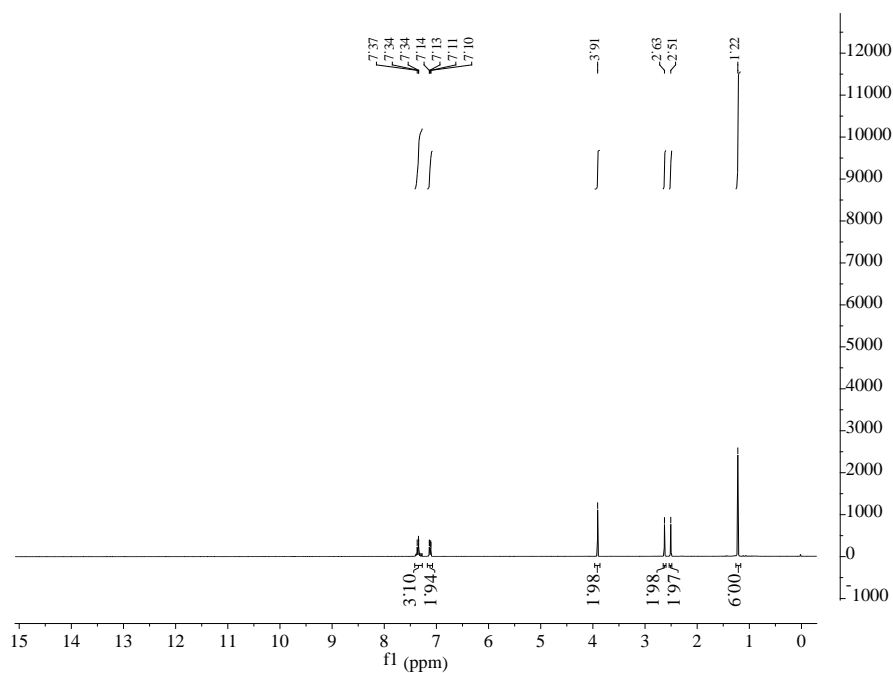



# <sup>13</sup>C NMR

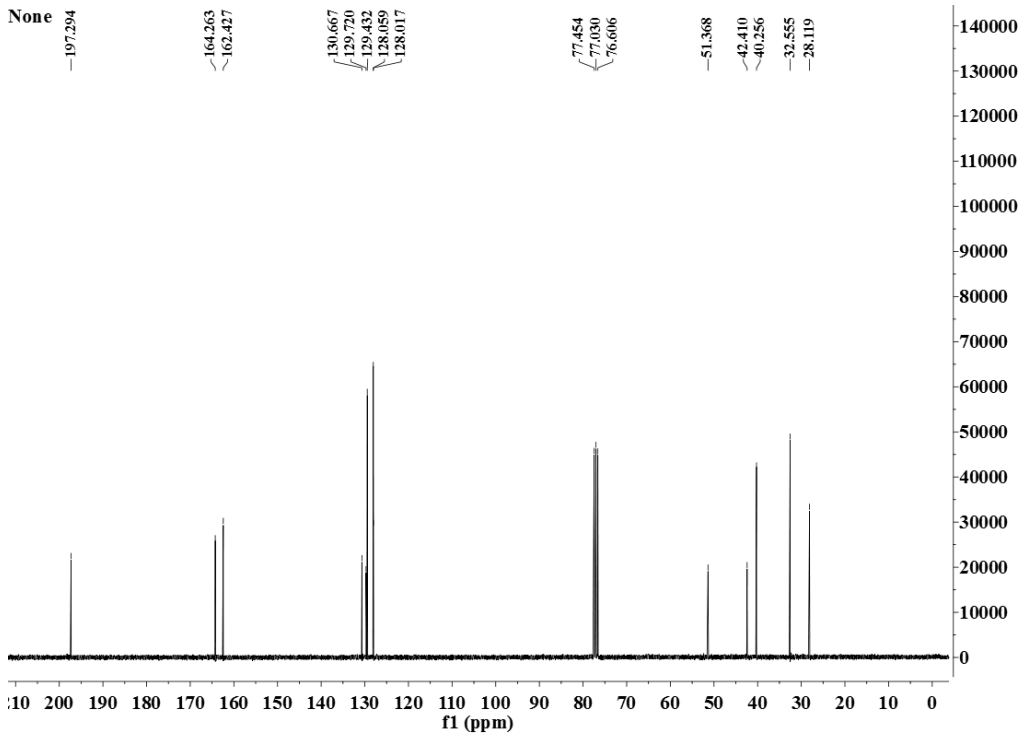

# HRMS

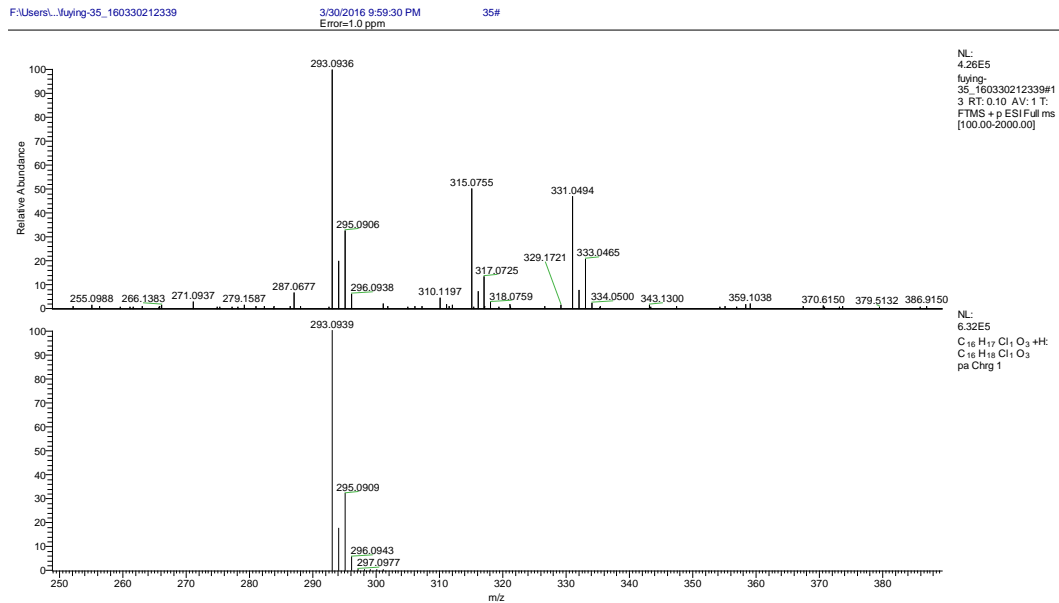

### 3-(Dichloroacetoxy)-2-phenyl-5,5-dimethyl-2-cyclohexen-1-one (S10)

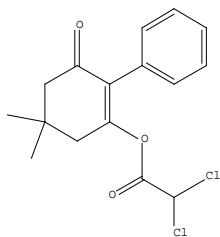

$C_{16}H_{16}Cl_2O_3$

IR

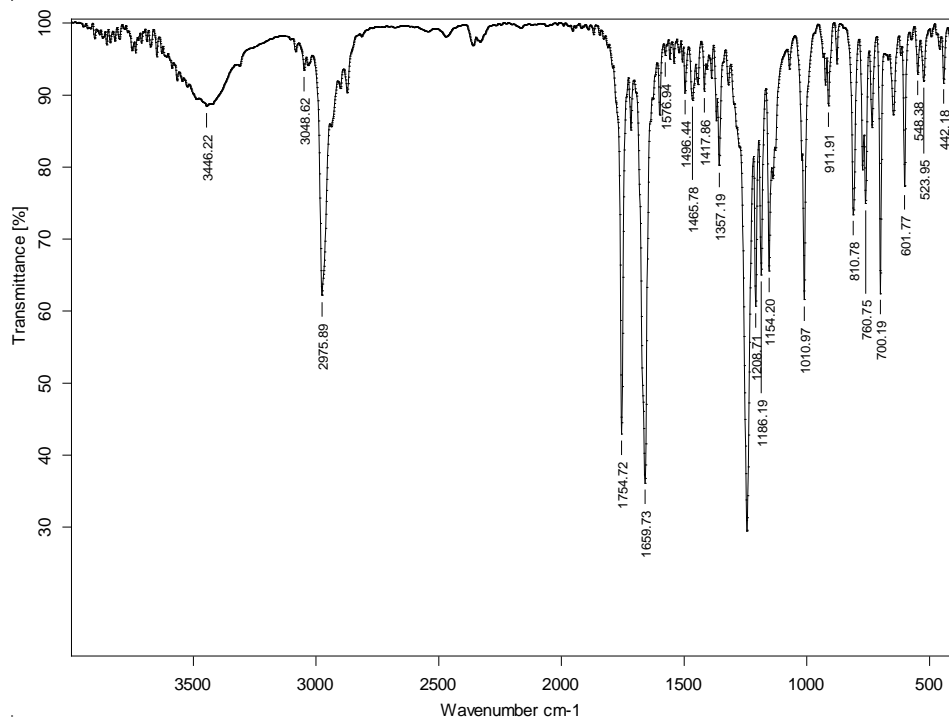

$^1H$  NMR

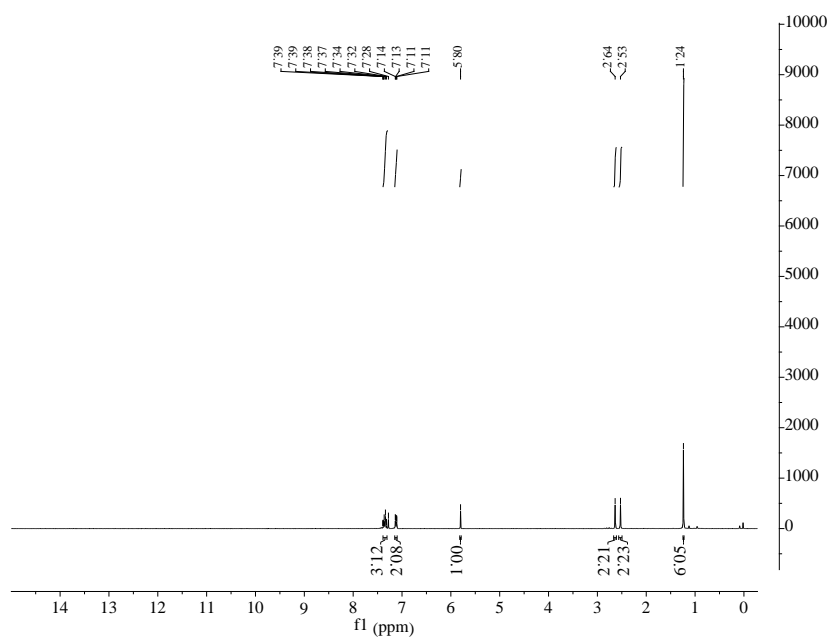

# <sup>13</sup>C NMR

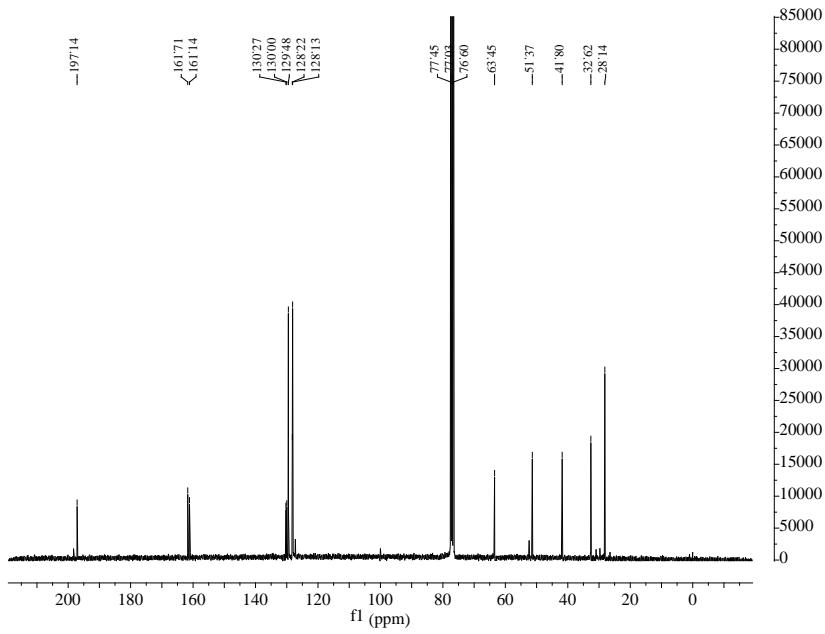

# HRMS

F:\Users\...luying-33\_160330212339

3/30/2016 9:47:39 PM  
Error=0.6 ppm

33#

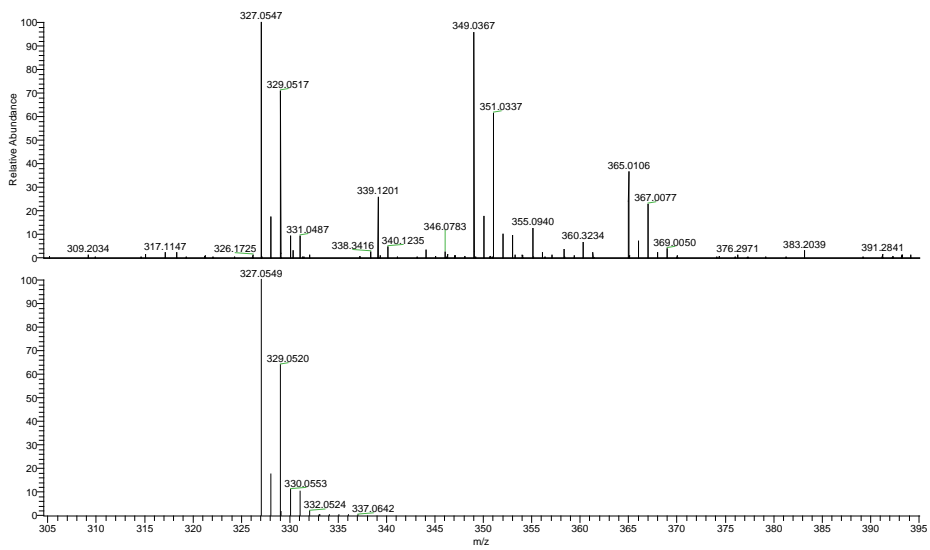

NL:  
5.34E5  
luying-  
33\_160330212339#1  
3 RT: 0.10 AV: 1 T:  
FTMS + p ESI Full ms  
[100.00-2000.00]

NL:  
4.79E5  
C<sub>16</sub>H<sub>16</sub>Cl<sub>2</sub>O<sub>3</sub> +H  
C<sub>16</sub>H<sub>17</sub>Cl<sub>2</sub>O<sub>3</sub>  
pa Chrg 1

### 3-(Phenoxyacetoxy)-2-phenyl-2-cyclohexen-1-one (S11)

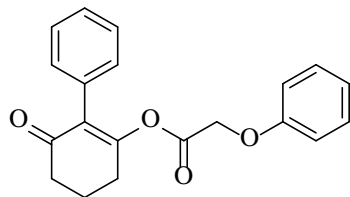

$C_{20}H_{18}O_4$

IR

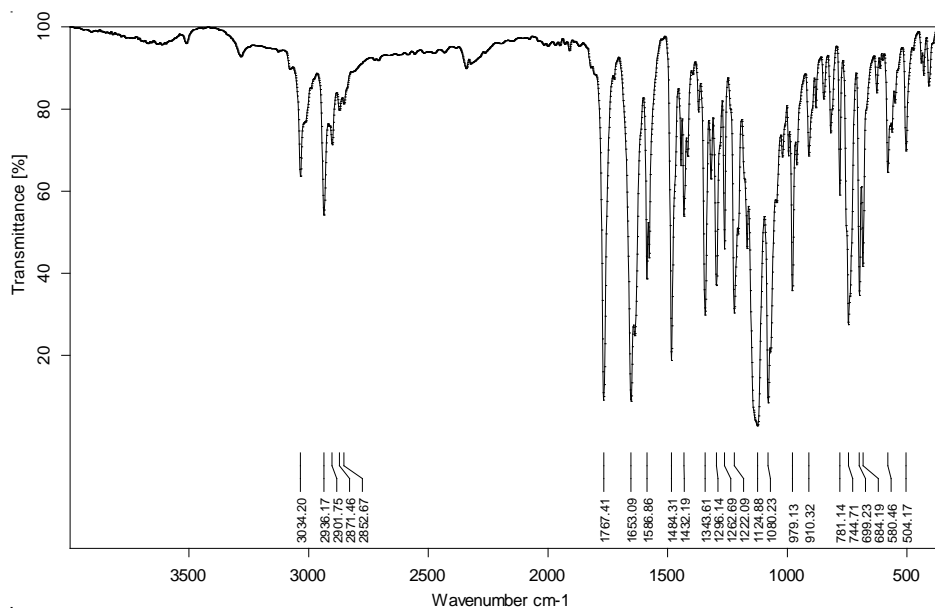

|                          |                    |                                    |            |
|--------------------------|--------------------|------------------------------------|------------|
| F:\Sample description.25 | Sample description | Instrument type and / or accessory | 13/03/2017 |
|--------------------------|--------------------|------------------------------------|------------|

Page 1/1

$^1H$  NMR

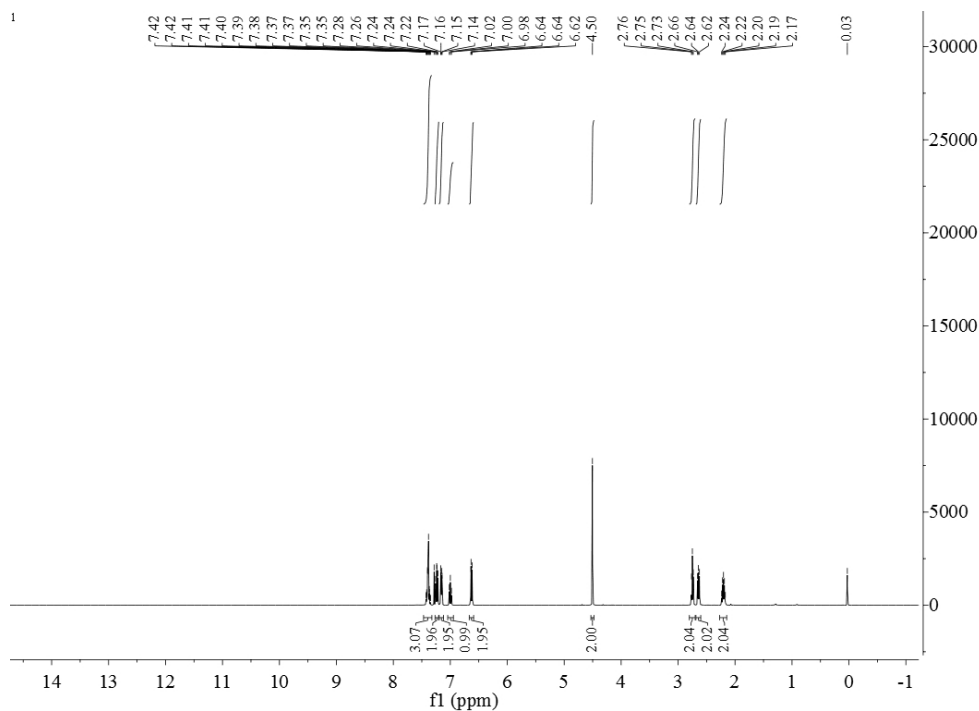

# <sup>13</sup>C NMR

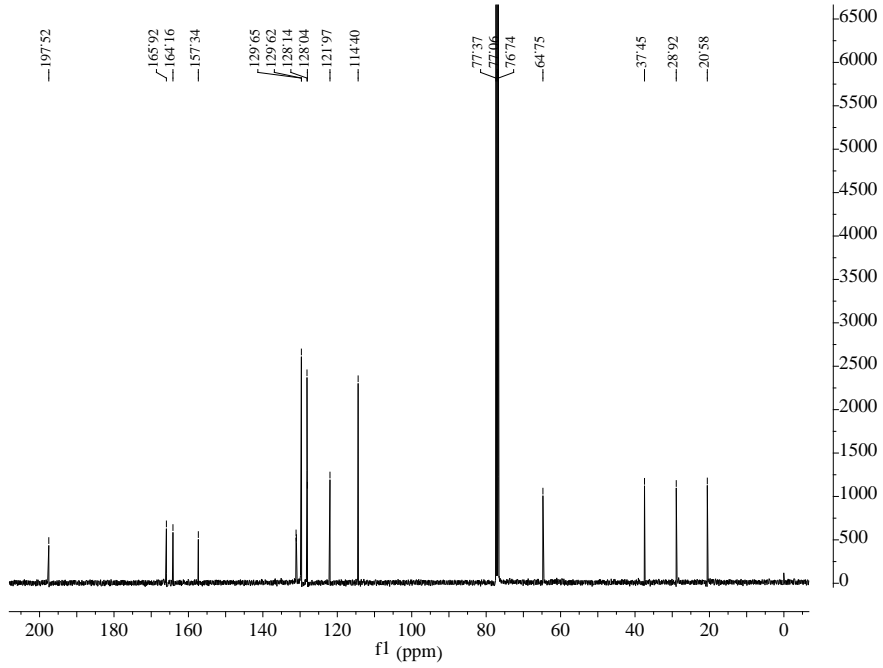

# HRMS

F:\Users\... \Nuying-6\_170105213037

1/5/2017 9:55:43 PM  
Error=0.9 ppm

6#

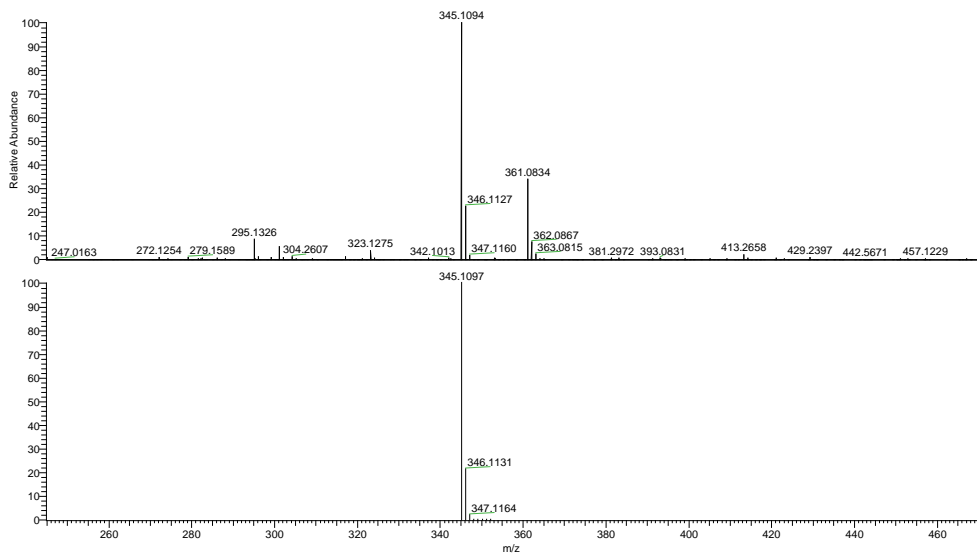

NL:  
5.76E6  
Nuying-6  
6\_170105213037#11  
RT: 0.08 AV: 1 T:  
FTMS + p ESI Full  
ms [100.00-2000.00]

NL:  
7.97E5  
C<sub>20</sub>H<sub>18</sub>O<sub>4</sub>+Na:  
C<sub>20</sub>H<sub>18</sub>O<sub>4</sub>Na:  
pa Chrg 1

### 3-(Phenoxyacetoxy)-2-phenyl-5-methyl-2-cyclohexen-1-one (S12)

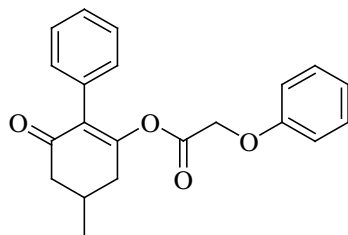

$C_{21}H_{20}O_4$

IR

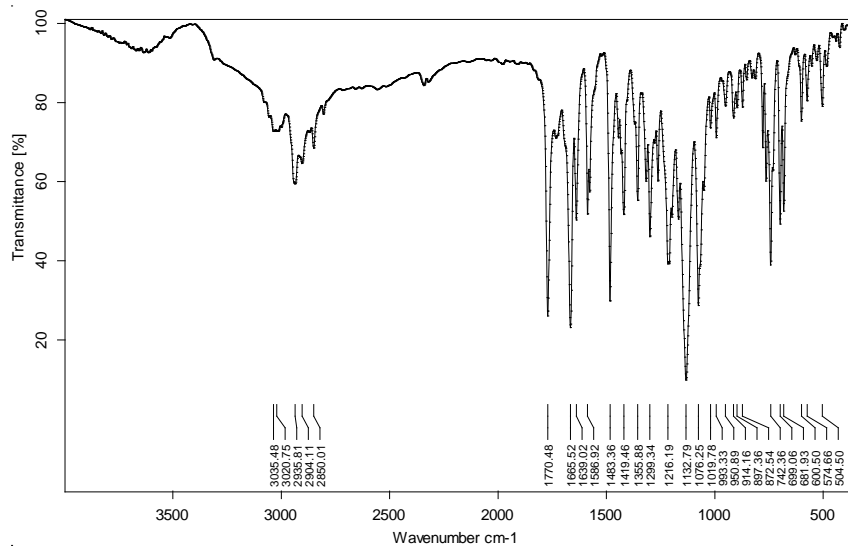

F:\Sample description.27

Sample description

Instrument type and / or accessory

13/03/2017

Page 1/1

$^1H$  NMR

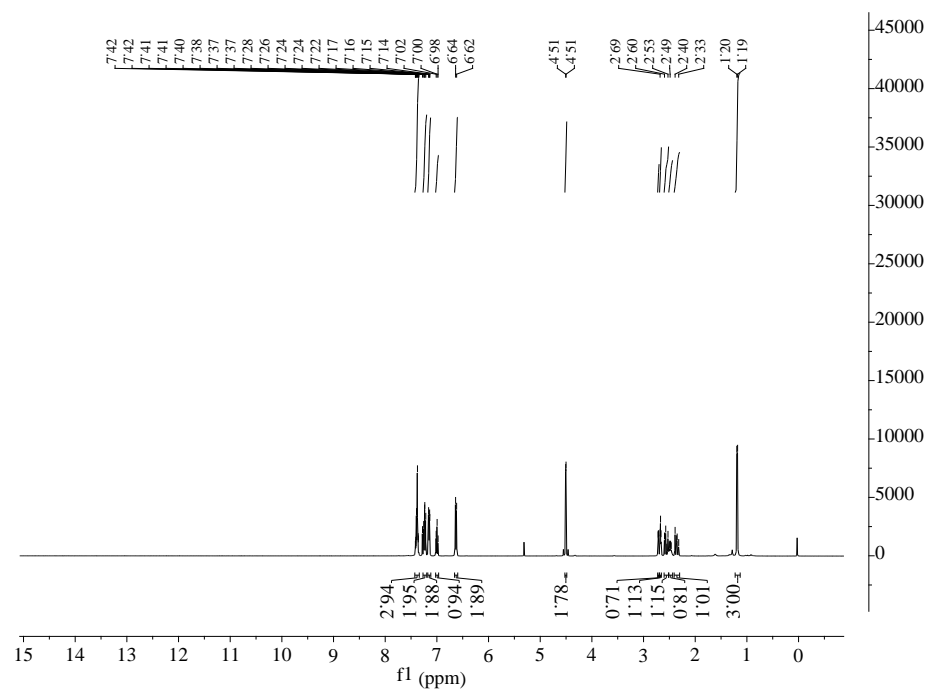

# <sup>13</sup>C NMR

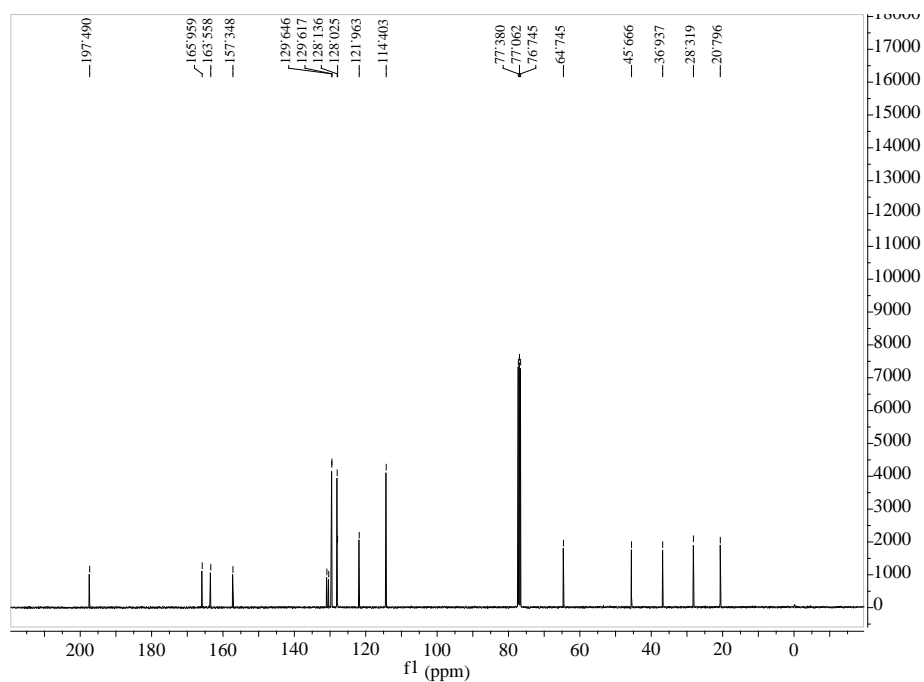

# HRMS

F:\Users\Luying-7\_170105220107

1/5/2017 10:01:08 PM  
Error=0.8 ppm

7#

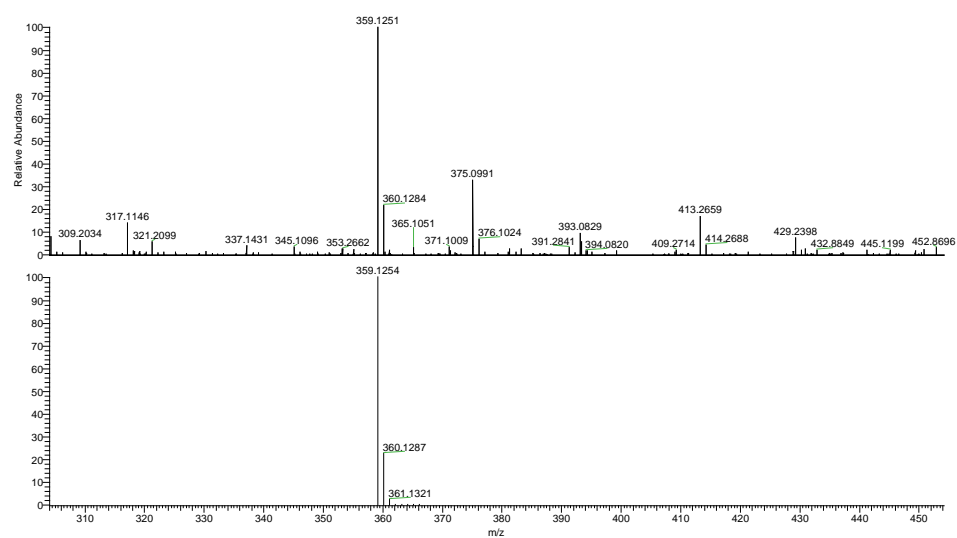

### 3-(Phenoxyacetoxy)-2-phenyl-5,5-dimethyl-2-cyclohexen-1-one (S13)

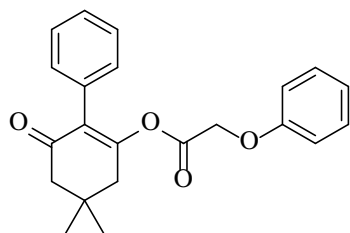

$C_{22}H_{22}O_4$

IR

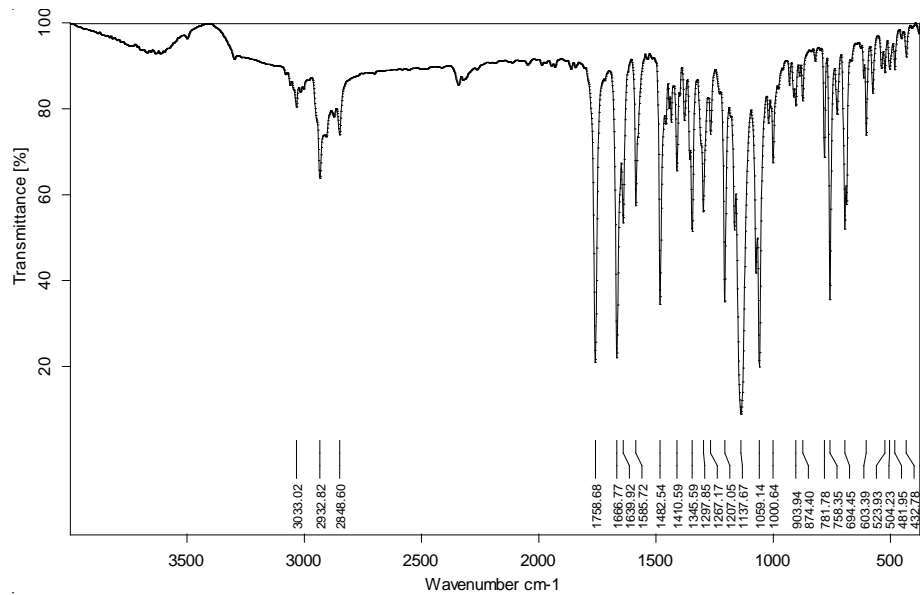

|                          |                    |                                    |            |
|--------------------------|--------------------|------------------------------------|------------|
| F:\Sample description.26 | Sample description | Instrument type and / or accessory | 13/03/2017 |
|--------------------------|--------------------|------------------------------------|------------|

Page 1/1

$^1H$  NMR

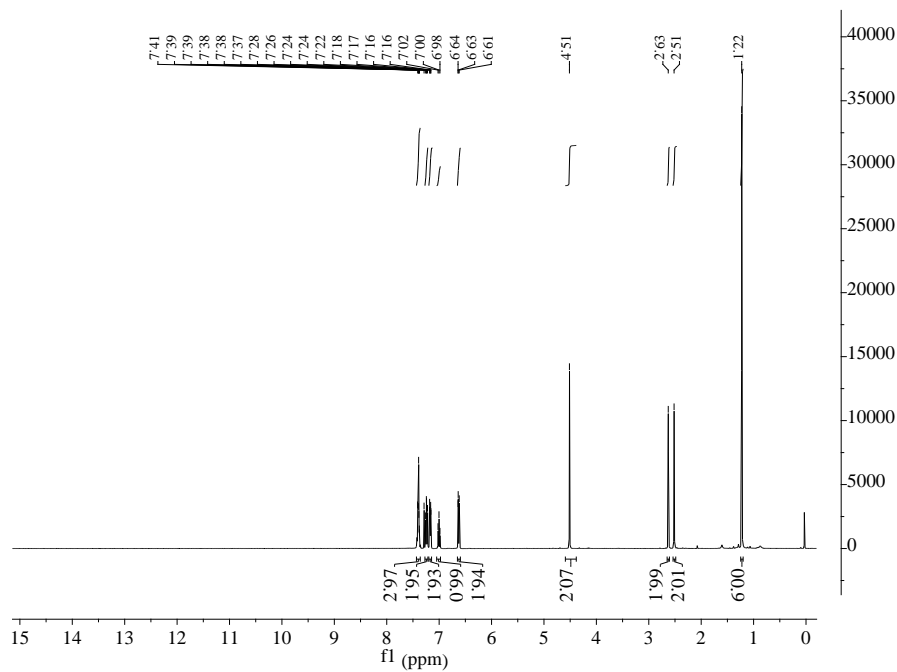



# <sup>13</sup>C NMR

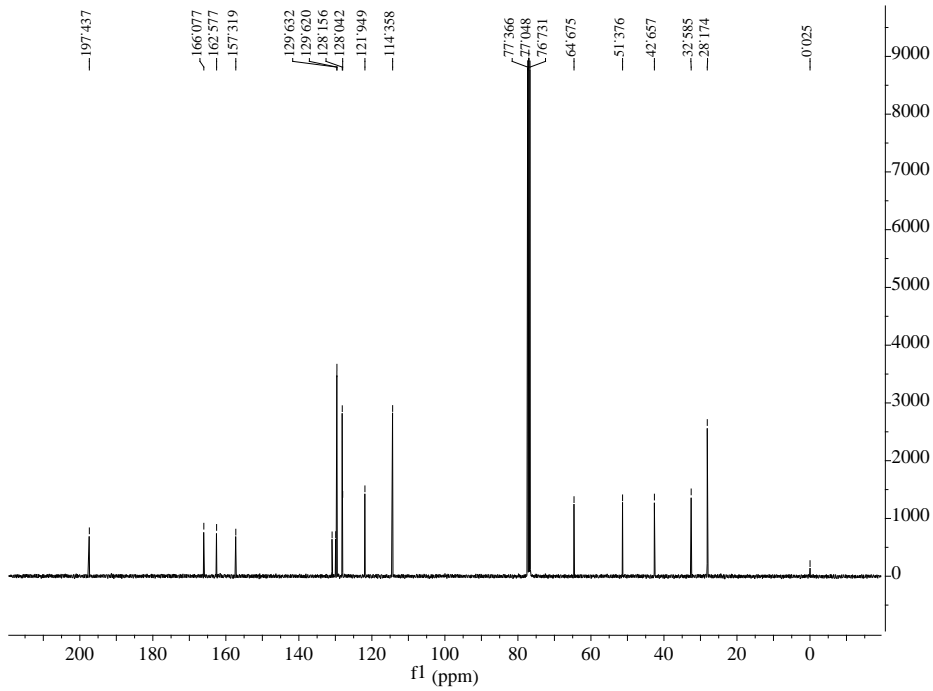

# HRMS

F:\Users\...yuying-15\_161110152428

11/10/2016 9:09:00 PM  
Error=1.7 ppm

15#

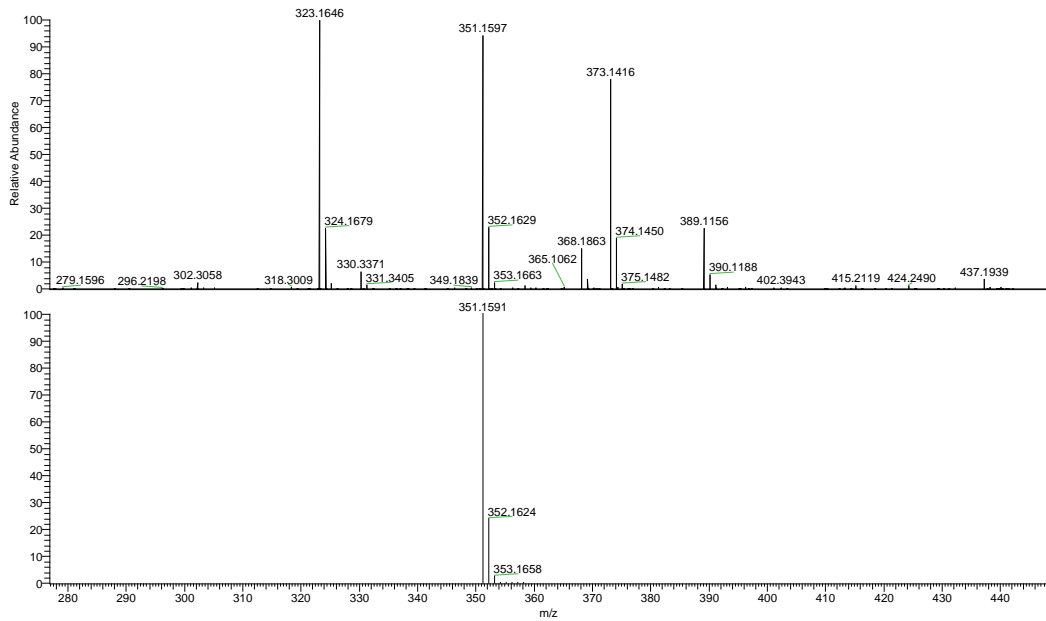

NL:  
2.80E6  
yuying-  
15\_161110152428#1  
5 RT: 0.11 AV: 1 T:  
FTMS + p ESI Full ms  
[100.00-2000.00]

NL:  
7.80E5  
C<sub>22</sub>H<sub>22</sub>O<sub>4</sub> +H:  
C<sub>22</sub>H<sub>23</sub>O<sub>4</sub>  
pa Chrg 1

### 3-(3-Acetylpropionyloxy)-2-phenyl-2-cyclohexen-1-one (S14)

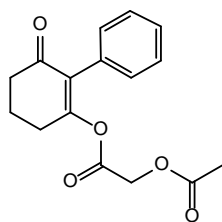

$C_{16}H_{16}O_5$

IR

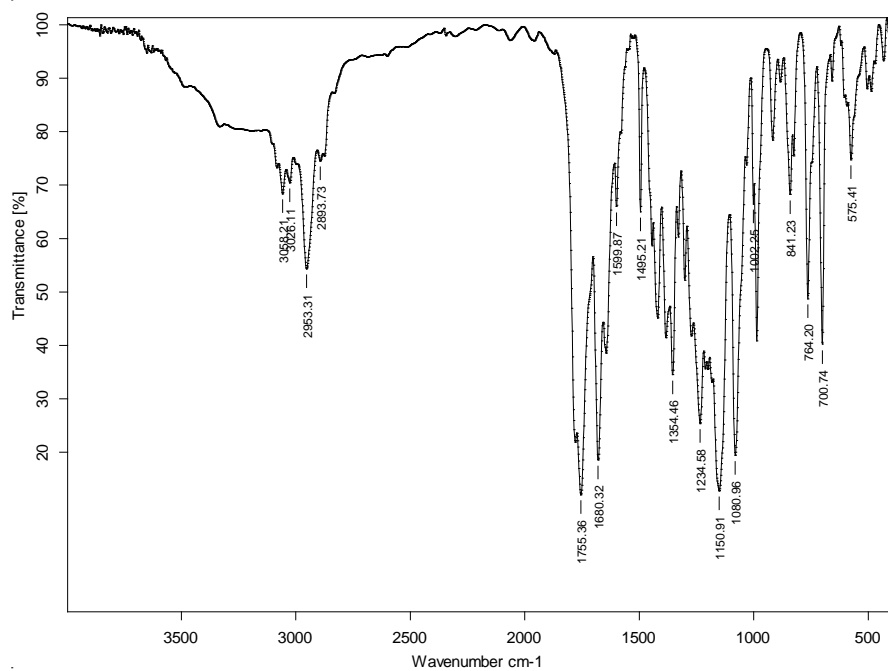

$^1H$  NMR

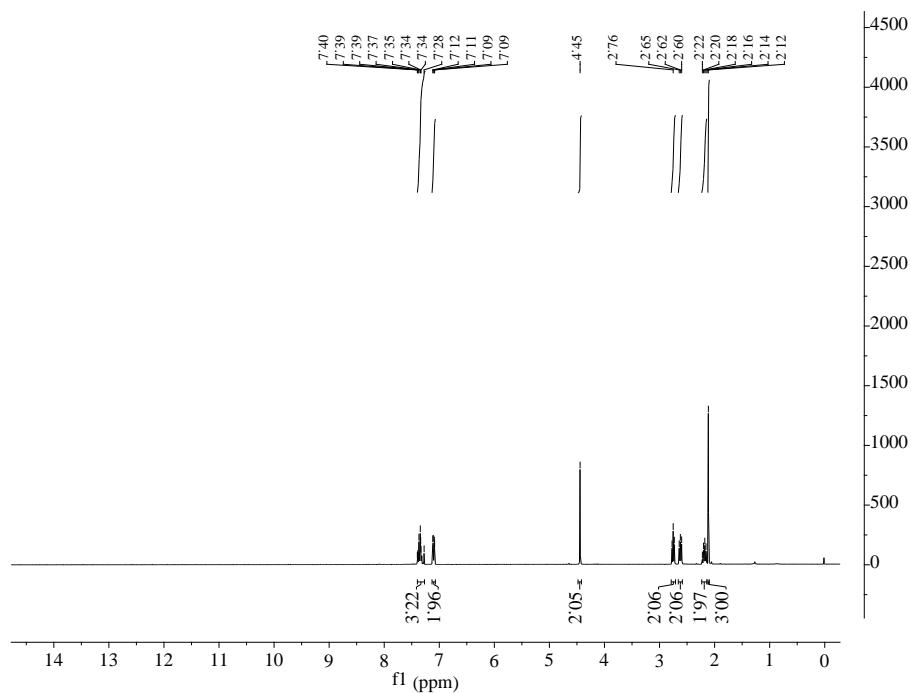

# <sup>13</sup>C NMR

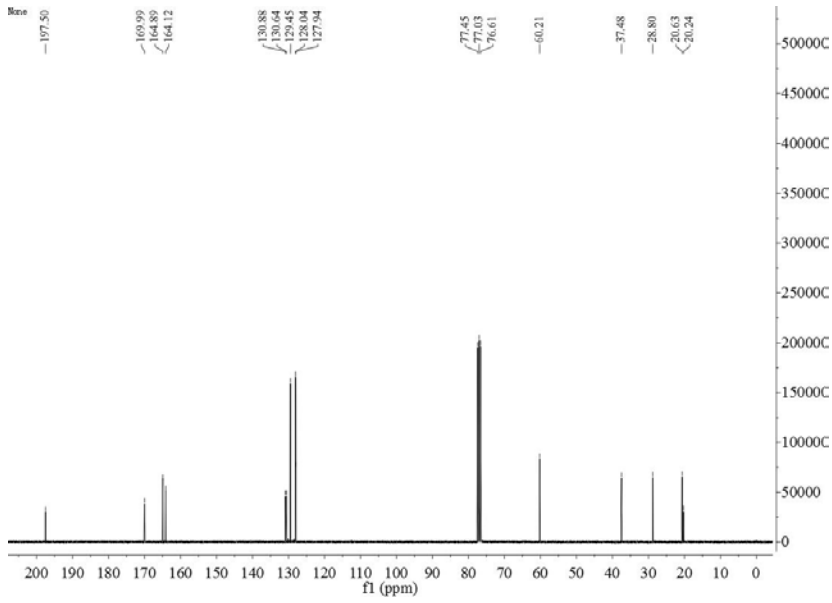

# HRMS

F:\Users\...Nuyng-12\_161110152428

11/10/2016 8:55:53 PM  
Error=1.3 ppm

12#

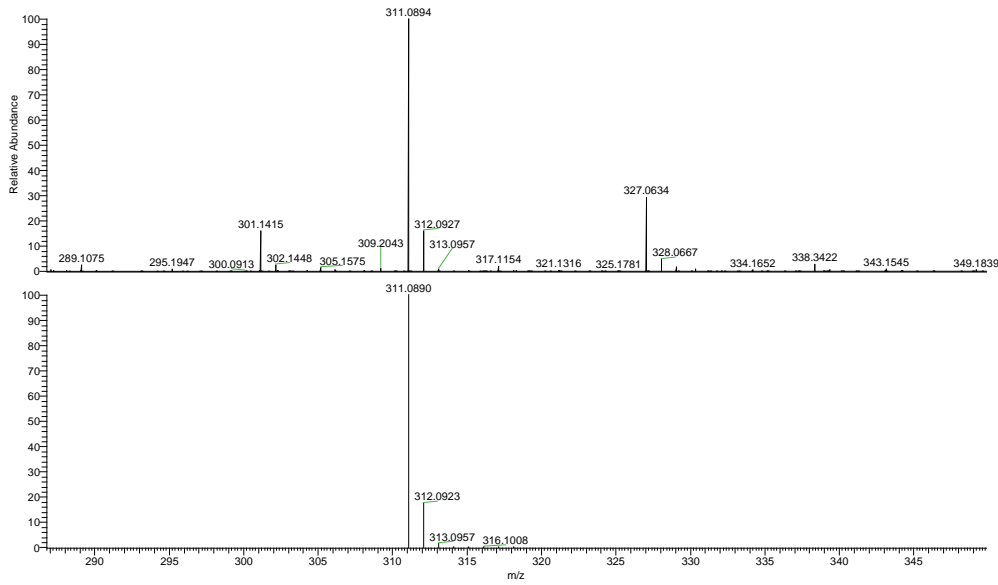

NL:  
6.37E5  
Nuyng-  
12\_161110152428#5  
RT: 0.04 AV: 1 T:  
FTMS + p ESI Full  
ms [100.00-2000.00]

NL:  
8.30E5  
C<sub>16</sub>H<sub>16</sub>O<sub>5</sub>+Na:  
C<sub>16</sub>H<sub>16</sub>O<sub>5</sub>Na:  
pa Chrg 1

### 3-(3-Acetylpropionyloxy)-2-phenyl-5-methyl-2-cyclohexen-1-one (S15)

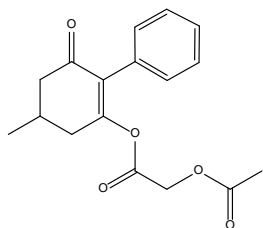

$C_{17}H_{18}O_5$

IR

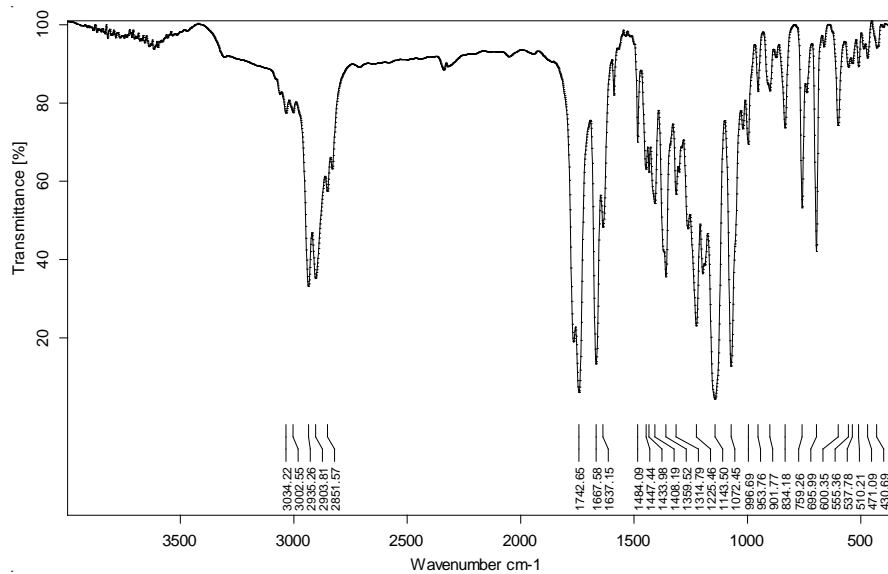

|                          |                    |                                    |            |
|--------------------------|--------------------|------------------------------------|------------|
| F:\Sample description.28 | Sample description | Instrument type and / or accessory | 13/03/2017 |
|--------------------------|--------------------|------------------------------------|------------|

Page 1/1

$^1H$  NMR

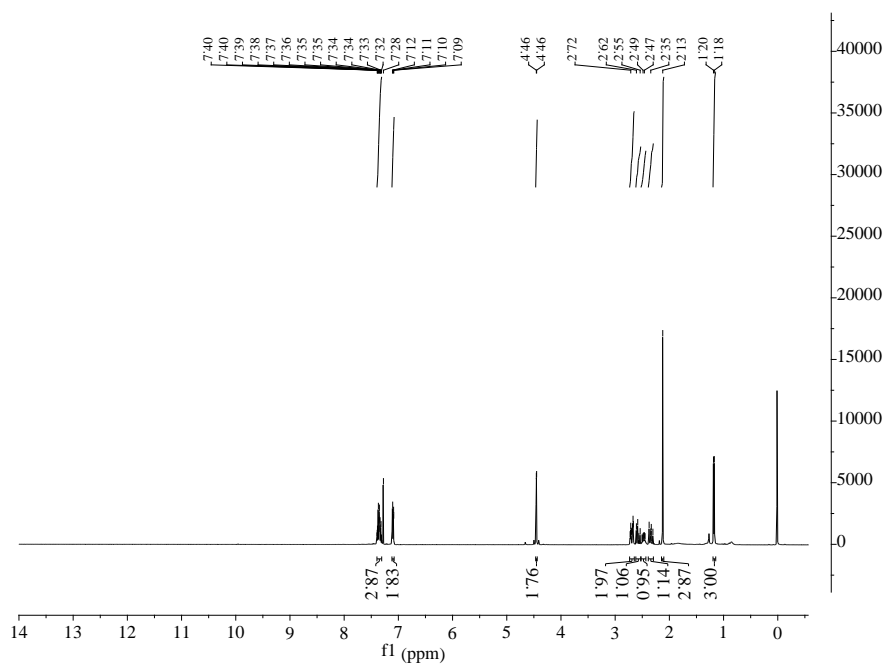

# <sup>13</sup>C NMR

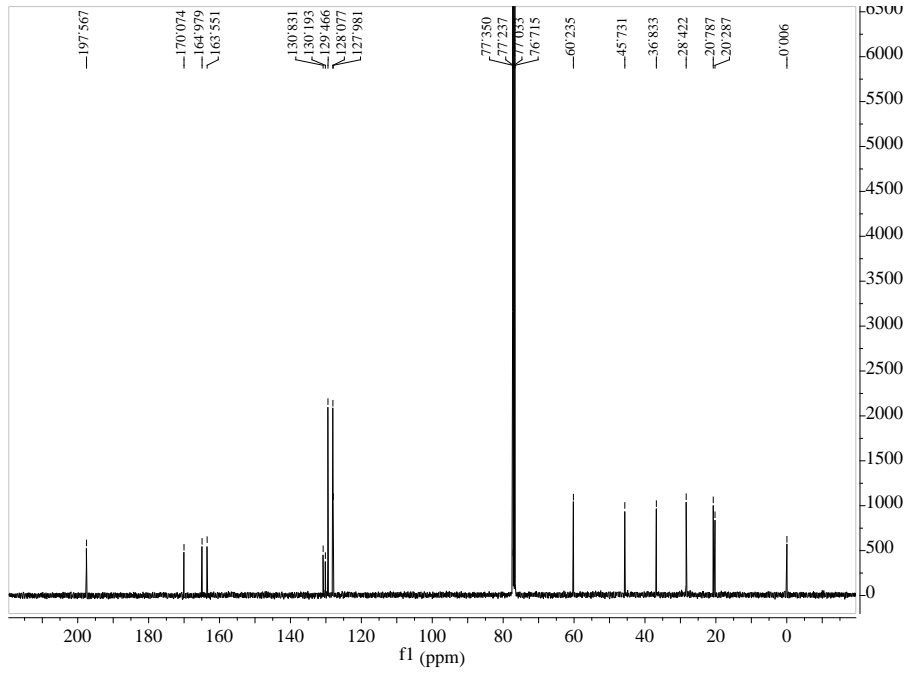

# HRMS

F:\Users\...uying-13\_161110152428

11/10/2016 9:00:36 PM  
Error=1.2 ppm

13#

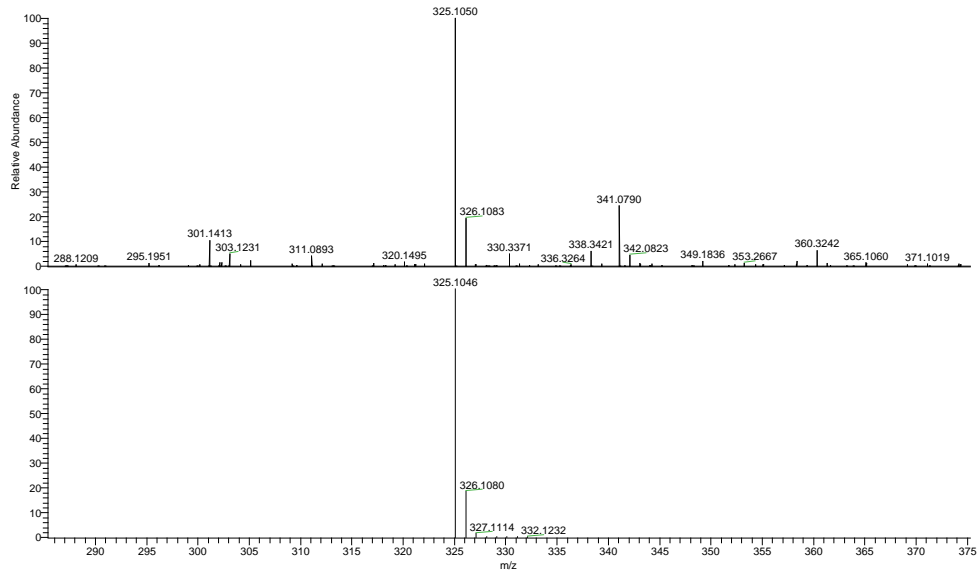

NL:  
7.92E5  
uying-  
13\_161110152428#1  
RT: 0.00 AV: 1 T:  
FTMS + p ESI Full  
ms [100.00-2000.00]

NL:  
8.21E5  
C<sub>17</sub>H<sub>18</sub>O<sub>5</sub> + Na:  
C<sub>17</sub>H<sub>18</sub>O<sub>5</sub> Na<sub>1</sub>  
pa Chg 1

### 3-(3-Acetylpropionyloxy)-2-phenyl-5,5-dimethyl-2-cyclohexen-1-one (S16)

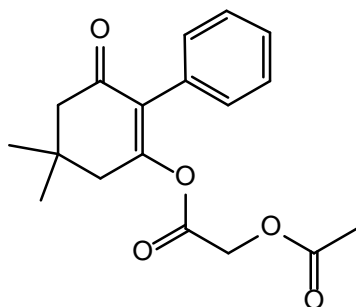

$C_{18}H_{20}O_5$

IR

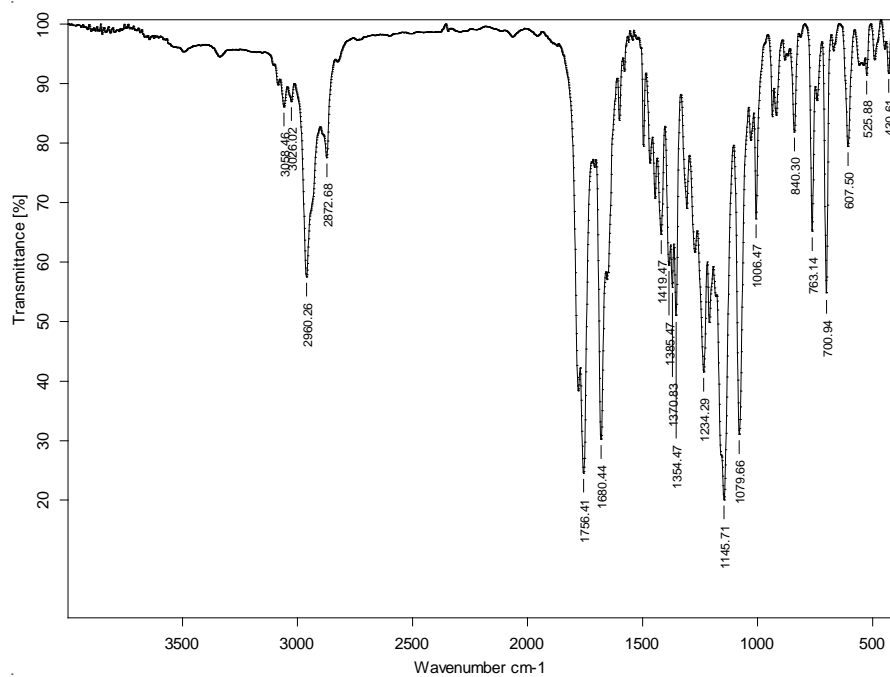

$^1H$  NMR

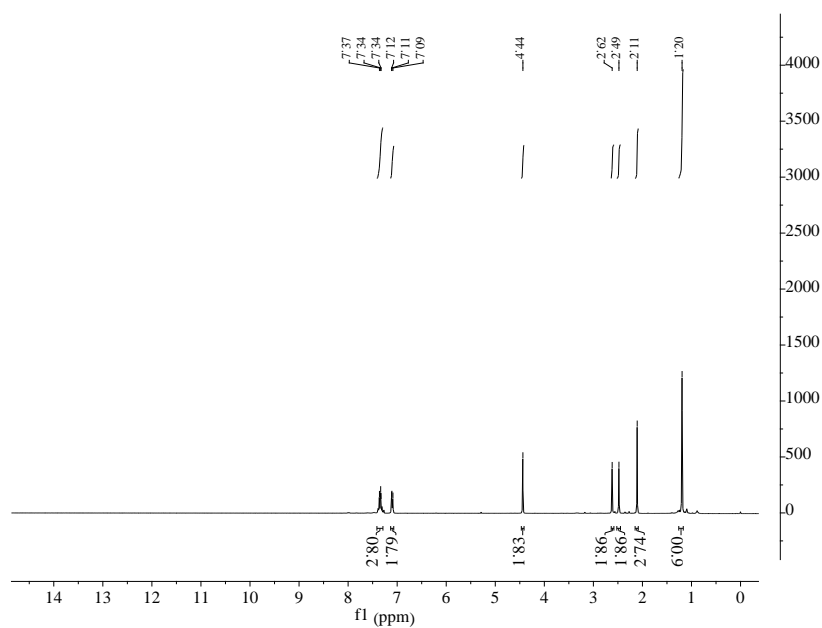

# <sup>13</sup>C NMR

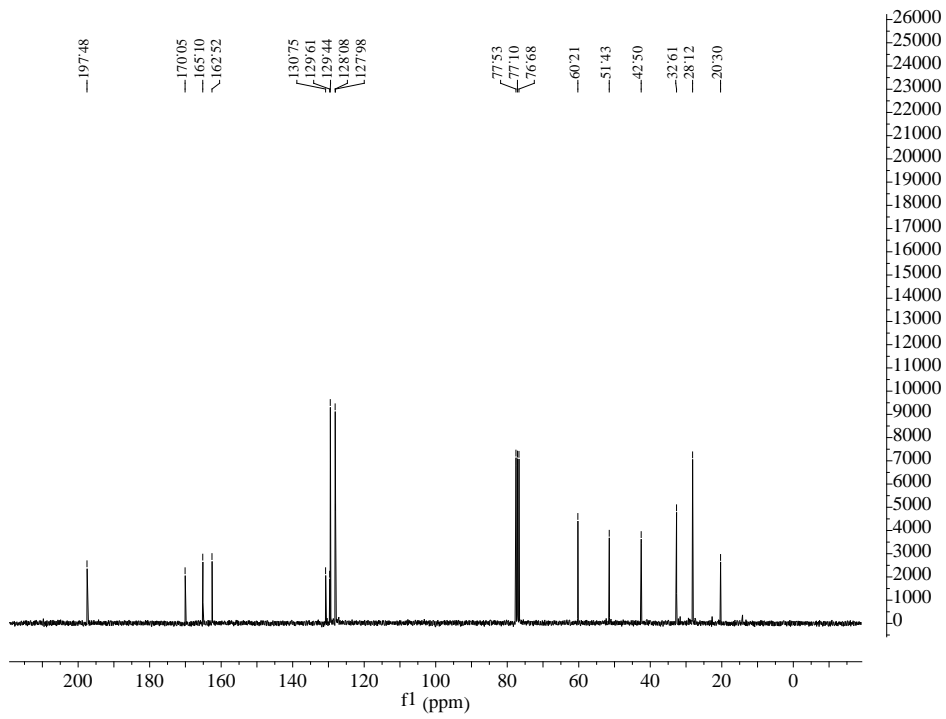

# HRMS

F:\Users\...\_fuying-32\_160330212339

3/30/2016 9:42:36 PM  
Error=0.9 ppm

32#

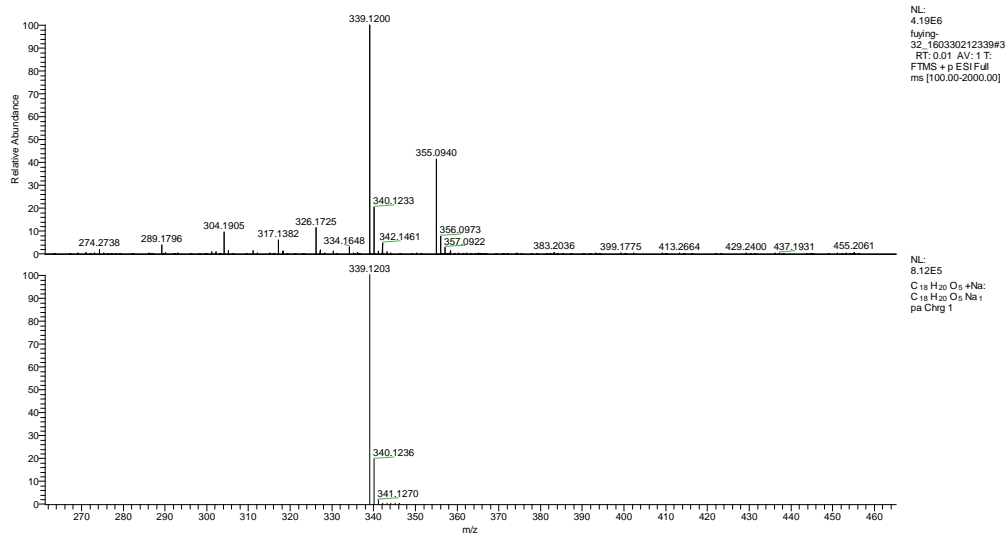

**3-[1-(2,4-Dichlorophenyl)-5-(trichloromethyl)-1H-1,2,4-triazol-3-yl]carbonyloxy-2-phenyl-2-cyclohexen-1-one (S17)**

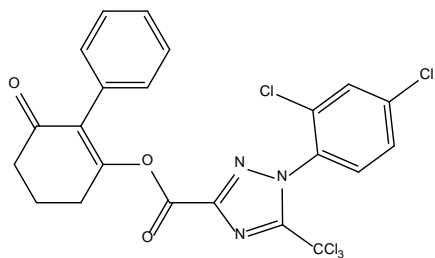

**C<sub>22</sub>H<sub>14</sub>Cl<sub>5</sub>N<sub>3</sub>O<sub>3</sub>**

**IR**

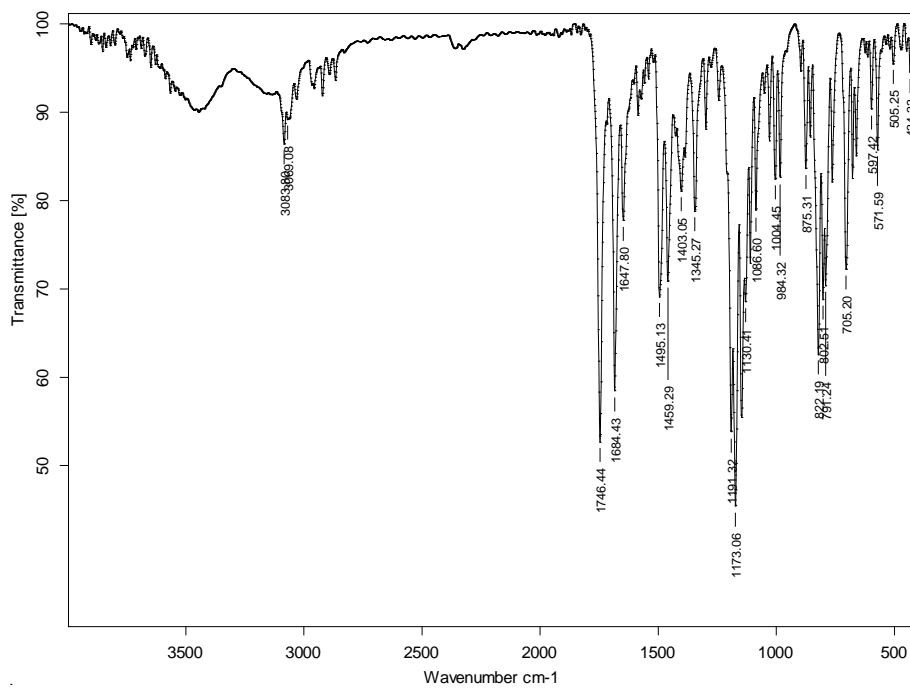

**<sup>1</sup>H NMR**

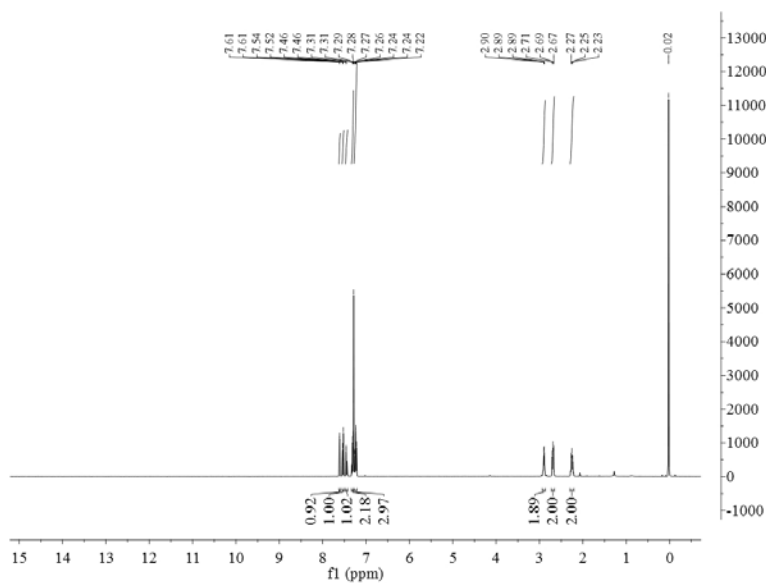



# <sup>13</sup>C NMR

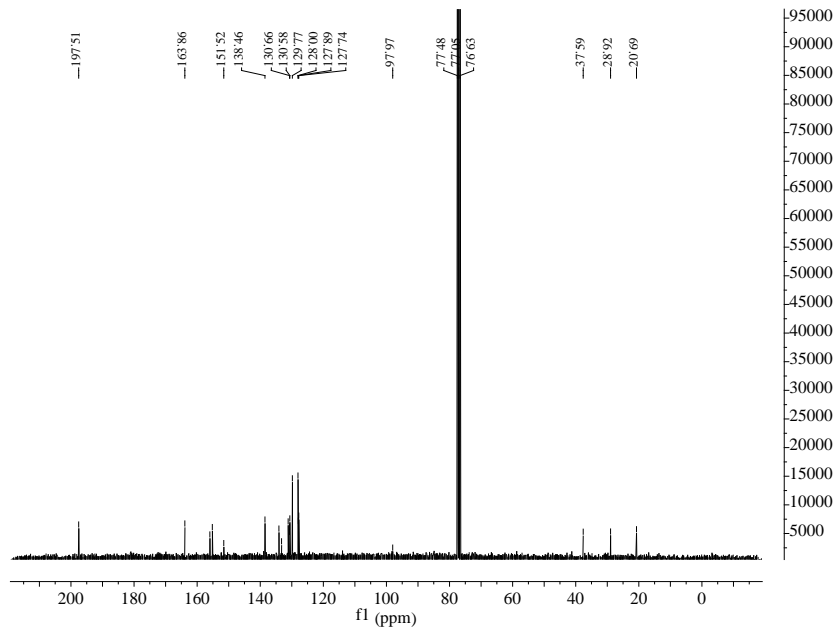

# HRMS

F:\Users\...uying-1\_161109161909

11/9/2016 8:39:56 PM  
Error=0.9 ppm

1#

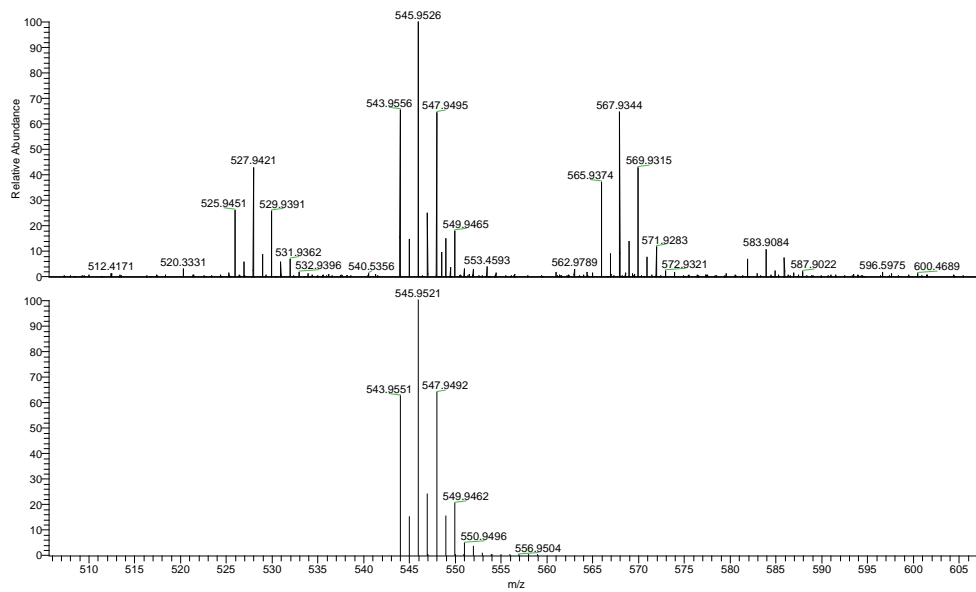

NL:  
7.54E5  
fuying-  
1\_161109161909#3  
RT: 0.02 AV: 1 T: FTMS  
+ p ESIFull.ms  
[100.00-2000.00]

NL:  
3.09E5  
C<sub>22</sub>H<sub>14</sub>Cl<sub>5</sub>N<sub>3</sub>O<sub>3</sub>+H<sup>+</sup>  
C<sub>22</sub>H<sub>15</sub>Cl<sub>5</sub>N<sub>3</sub>O<sub>3</sub>  
pa Chrg 1

**3-[1-(2,4-Dichlorophenyl)-5-(trichloromethyl)-1H-1,2,4-triazol-3-yl]carbonyloxy-2-phenyl-5-methyl-2-cyclohexen-1-one (S18)**

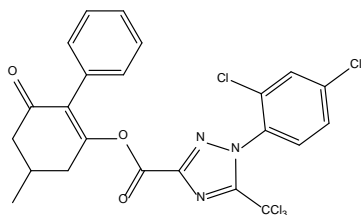

**C<sub>23</sub>H<sub>16</sub>Cl<sub>5</sub>N<sub>3</sub>O<sub>3</sub>**

**IR**

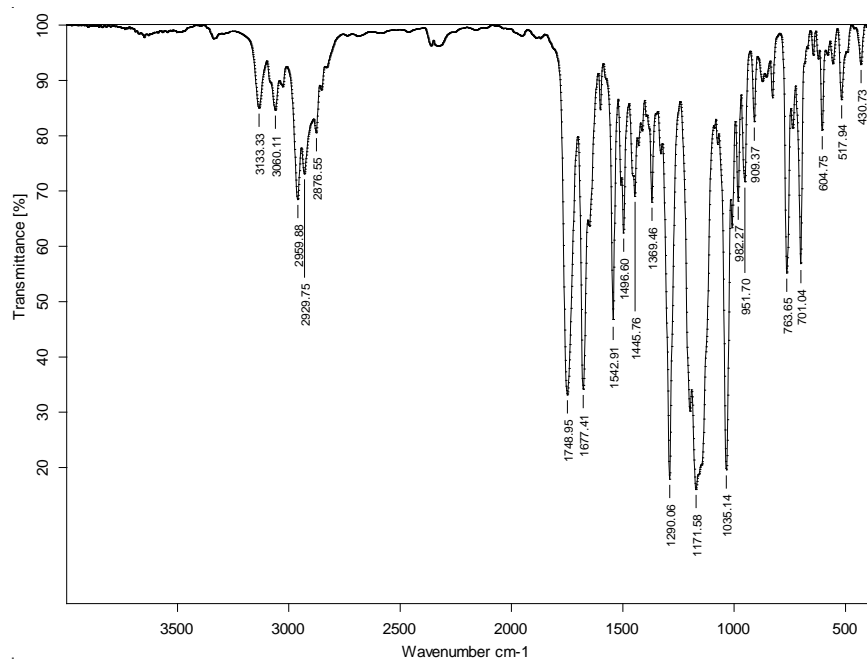

**<sup>1</sup>H NMR**

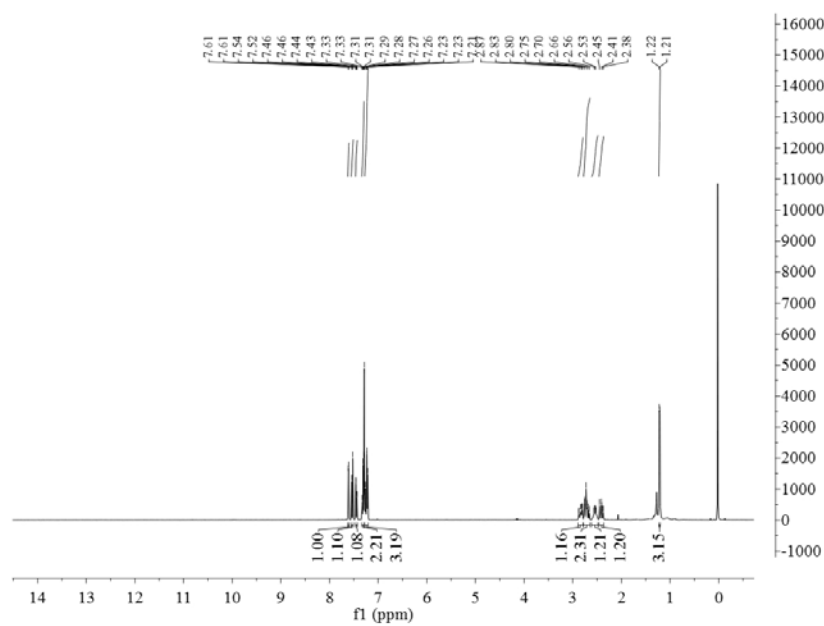

# <sup>13</sup>C NMR

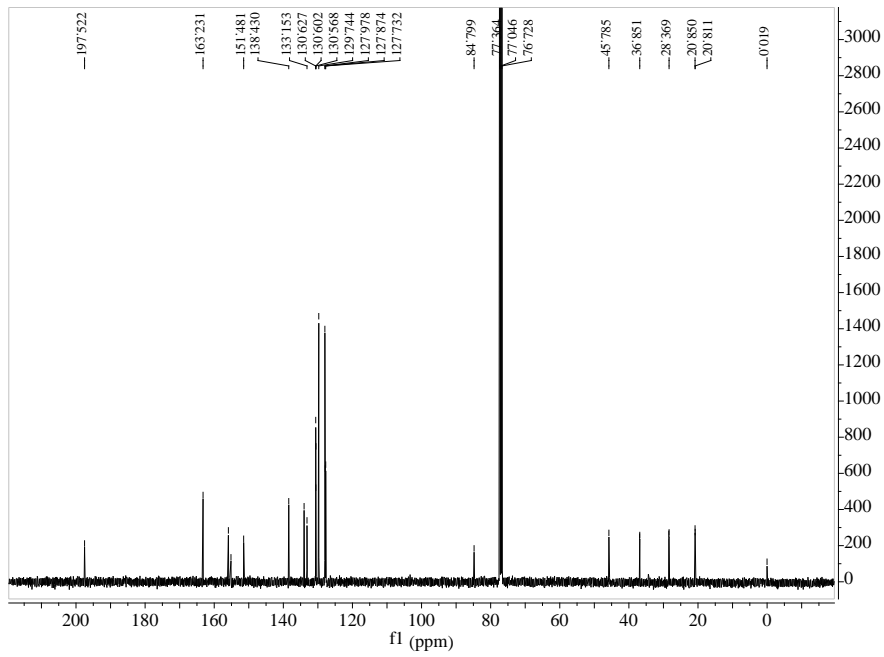

# HRMS

F:\Users\...fuying-3\_161109161909

11/9/2016 9:39:38 PM  
Error=0.4 ppm

3#

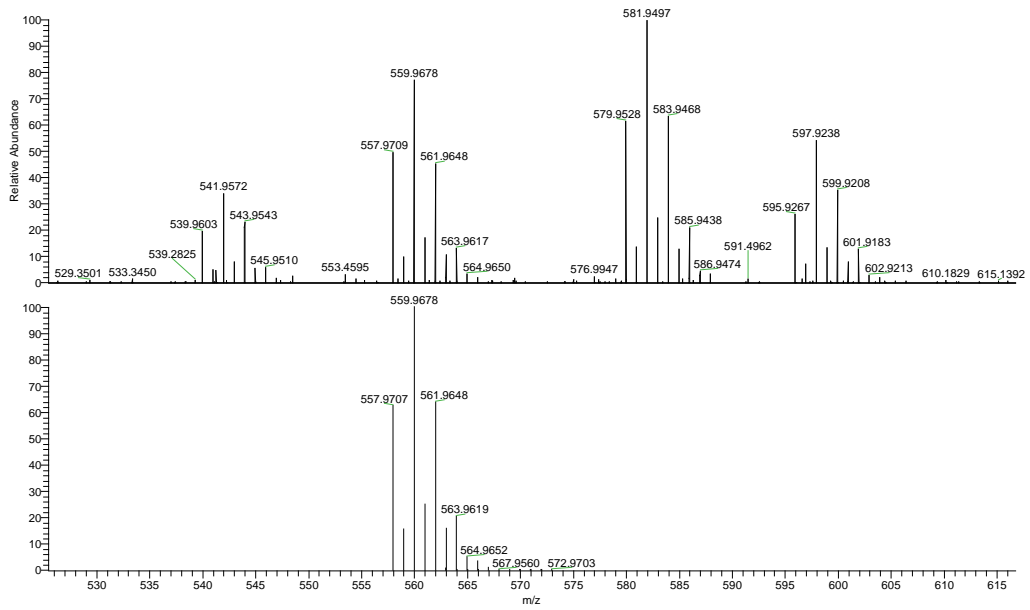

NL:  
9.54E5  
fuying-  
3\_161109161909#8  
RT: 0.06 AV: 1 T: FTMS  
+ p ESI Full ms  
[100.00-2000.00]

NL:  
3.06E5  
C<sub>23</sub>H<sub>16</sub>Cl<sub>5</sub>N<sub>3</sub>O<sub>3</sub>+H  
C<sub>23</sub>H<sub>17</sub>Cl<sub>5</sub>N<sub>3</sub>O<sub>3</sub>  
pa Chrg 1

**3-[1-(2,4-Dichlorophenyl)-5-(trichloromethyl)-1H-1,2,4-triazol-3-yl]carbonyloxy-2-phenyl-5,5-dimethyl-2-cyclohexen-1-one (S19)**

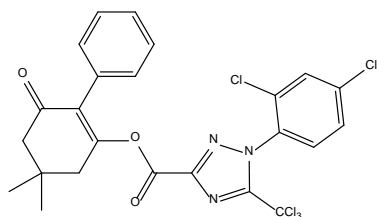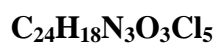

**IR**

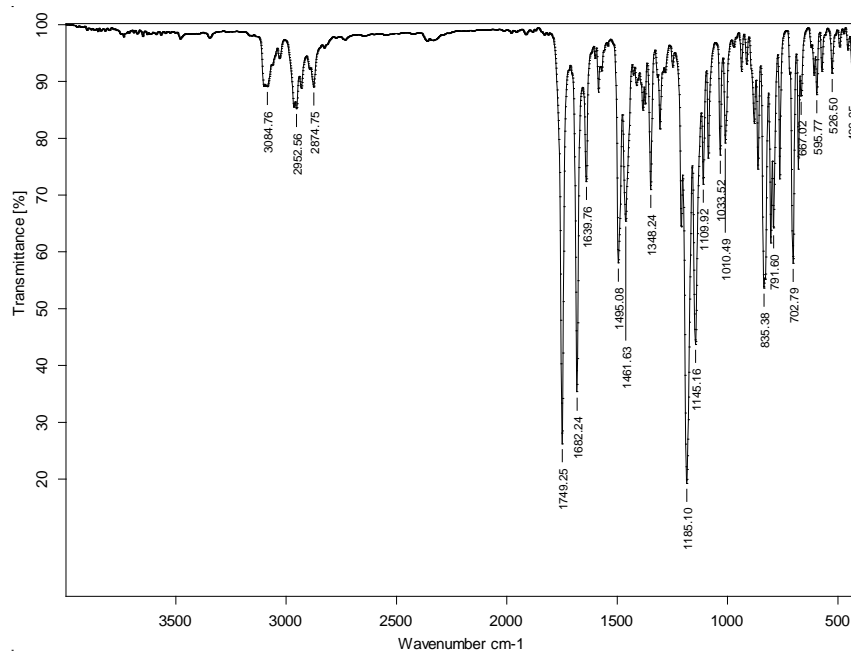

**<sup>1</sup>H NMR**

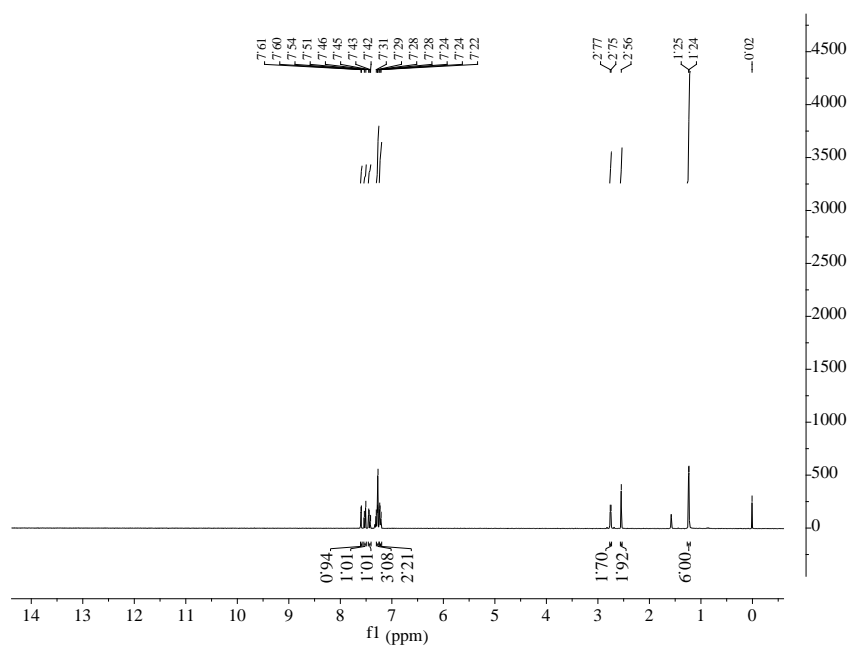

# <sup>13</sup>C NMR

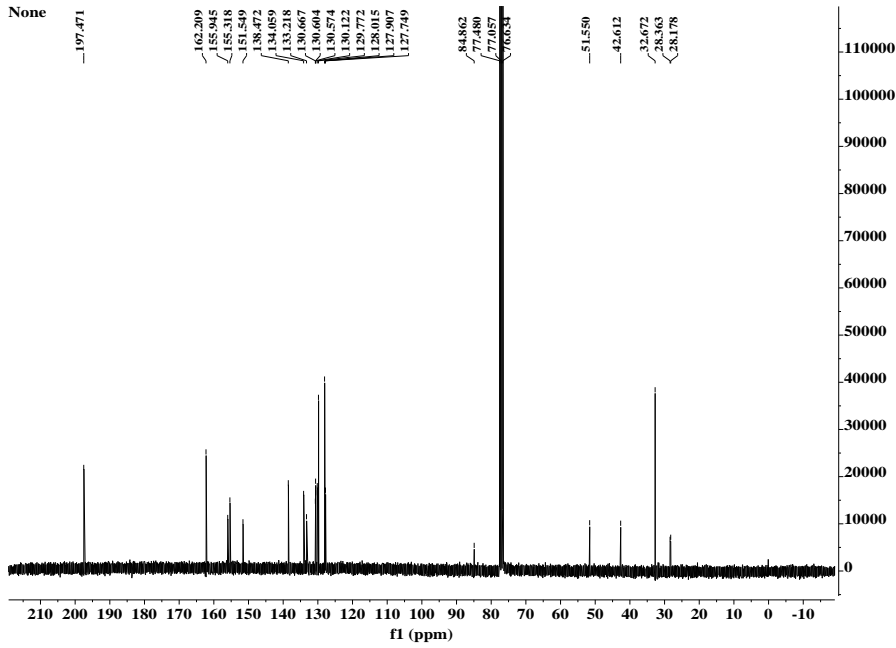

# HRMS

F:\Users\Luying\_2\_161109161909

11/9/2016 8:54:17 PM  
Error=0.5 ppm

2#

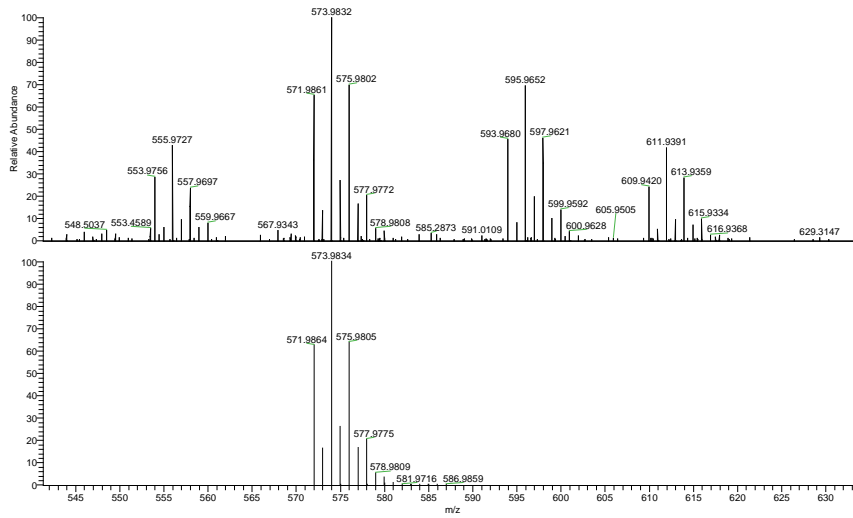

NL:  
4.75E5  
Luying-  
2\_161109161909#10  
RT: 0.07 AV: 1 T: FTMS  
+ p ESI Full ms  
[100.00-2000.00]

NL:  
3.02E5  
C<sub>22</sub>H<sub>18</sub>Cl<sub>5</sub>N<sub>3</sub>O<sub>3</sub>+H<sup>+</sup>  
C<sub>22</sub>H<sub>18</sub>Cl<sub>5</sub>N<sub>3</sub>O<sub>3</sub>  
pa Chrg 1

# 3-[5-Methyl-3-phenylisoxazole-4-carboxyloxy]-2-phenyl-2-cyclohexen-1-one (S20)

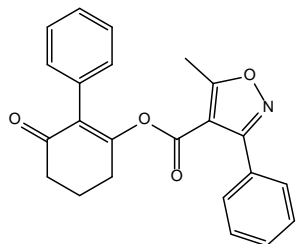

$C_{23}H_{19}NO_4$

IR

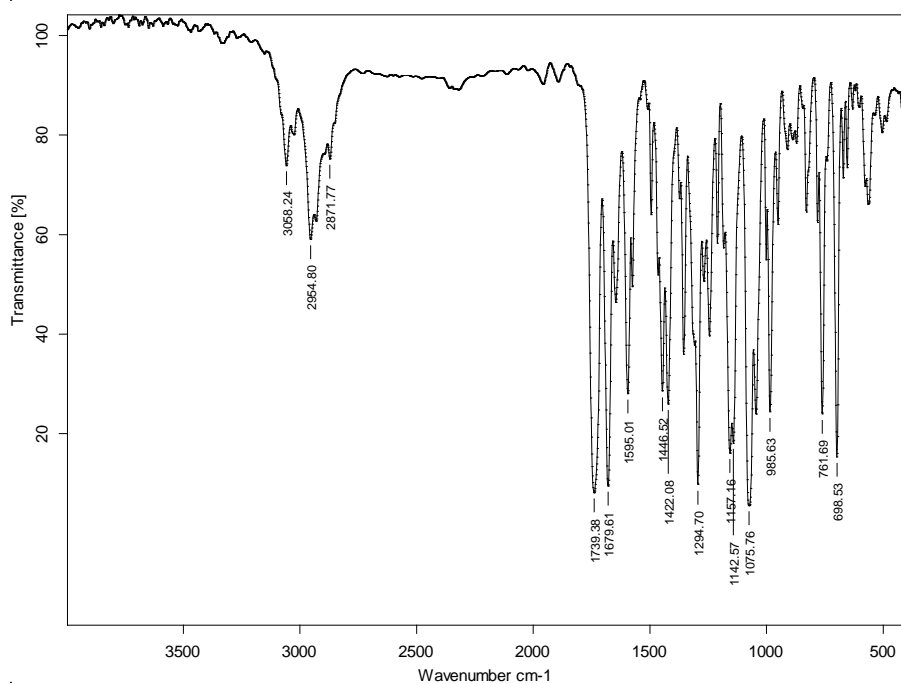

$^1H$  NMR

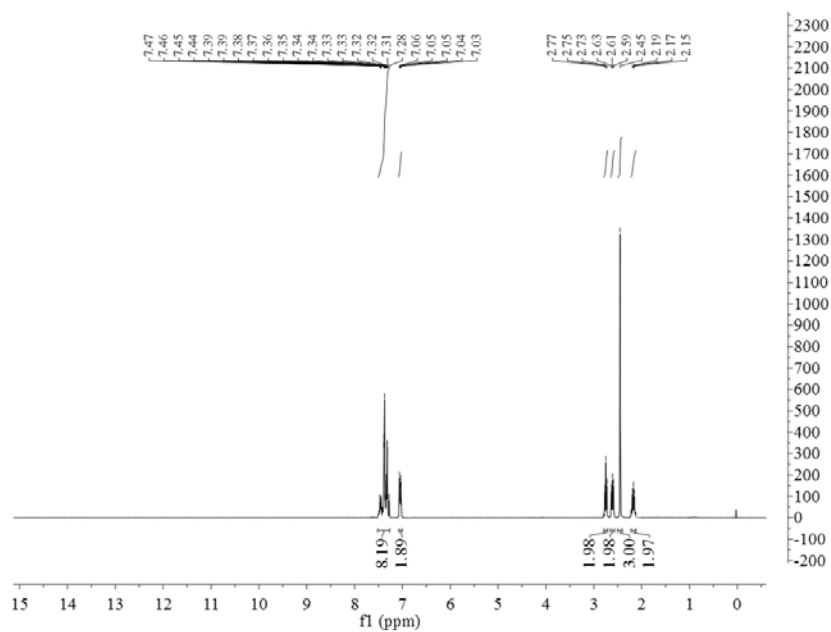

# <sup>13</sup>C NMR

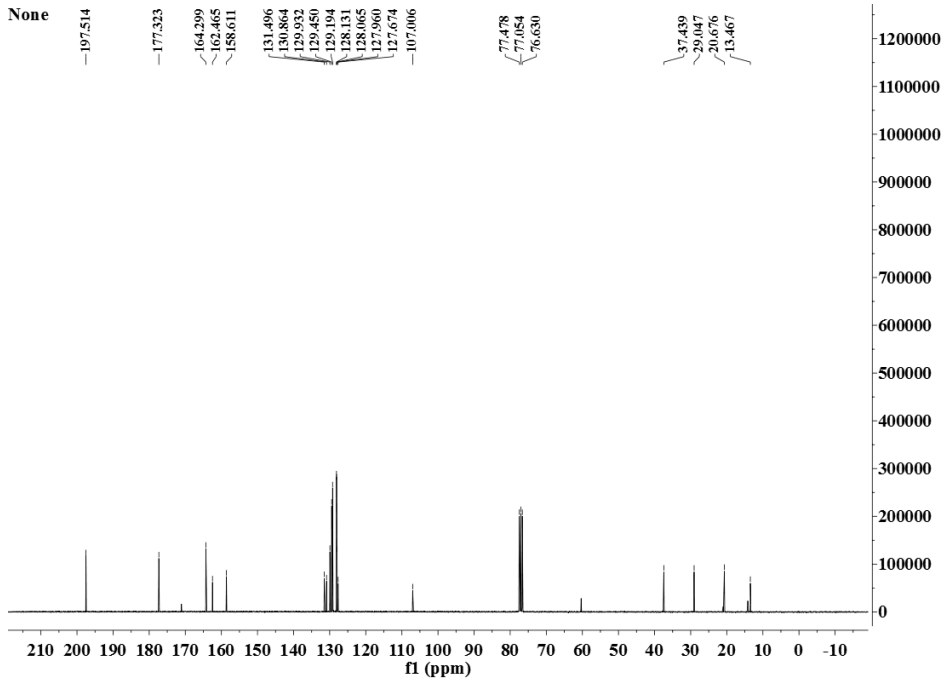

# HRMS

F:\Users\luying-9\_161110152428

11/10/2016 8:42:05 PM  
Error=1.3 ppm

9#

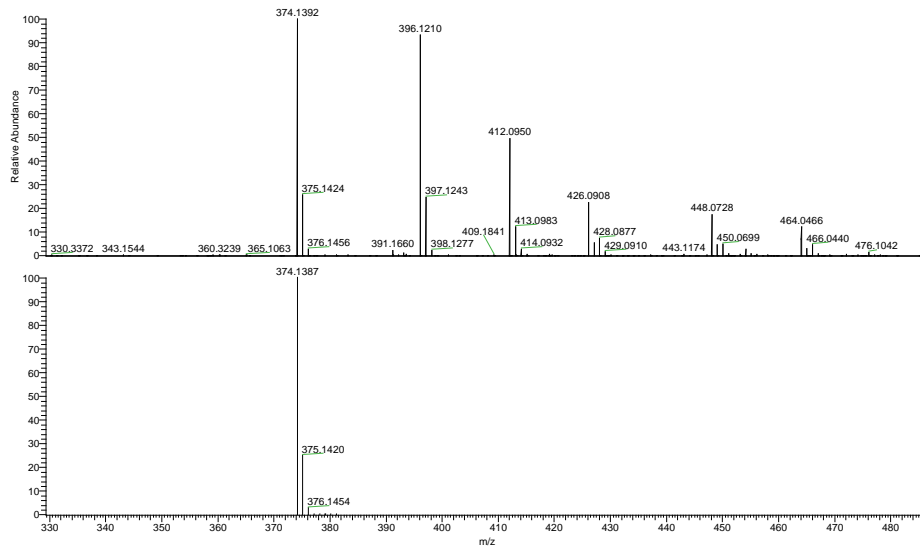

NL:  
3.63E6  
luying-  
9\_161110152428#1  
RT: 0.00 AV: 1 T:  
FTMS + p ESI Full  
ms [100.00-2000.00]

NL:  
7.69E5  
C<sub>23</sub>H<sub>19</sub>N<sub>1</sub>O<sub>4</sub>+H<sub>t</sub>  
C<sub>23</sub>H<sub>20</sub>N<sub>1</sub>O<sub>4</sub>  
pa Chrg 1

# 3-[5-Methyl-3-phenylisoxazole-4-carboxyloxy]-2-phenyl-5-methyl-2-cyclohexen-1-on (S21)

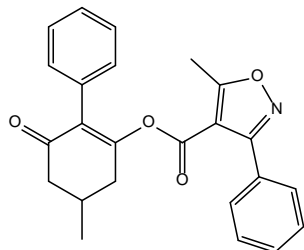

$C_{24}H_{21}NO_4$

IR

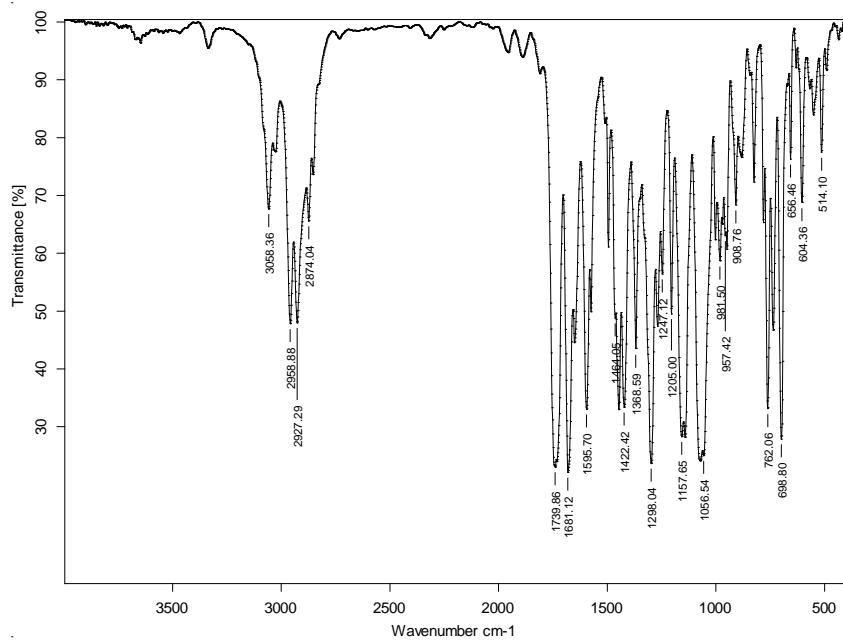

$^1H$  NMR

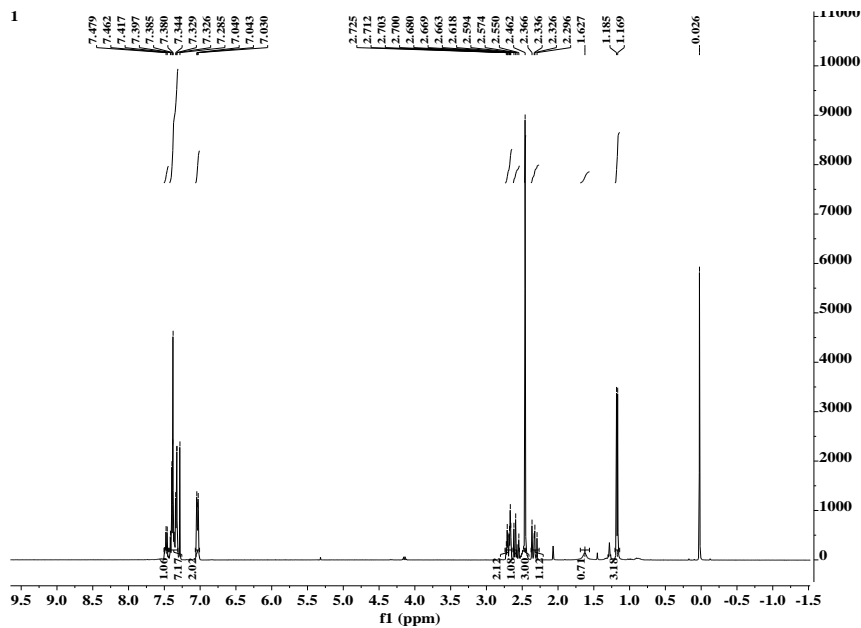



# <sup>13</sup>C NMR

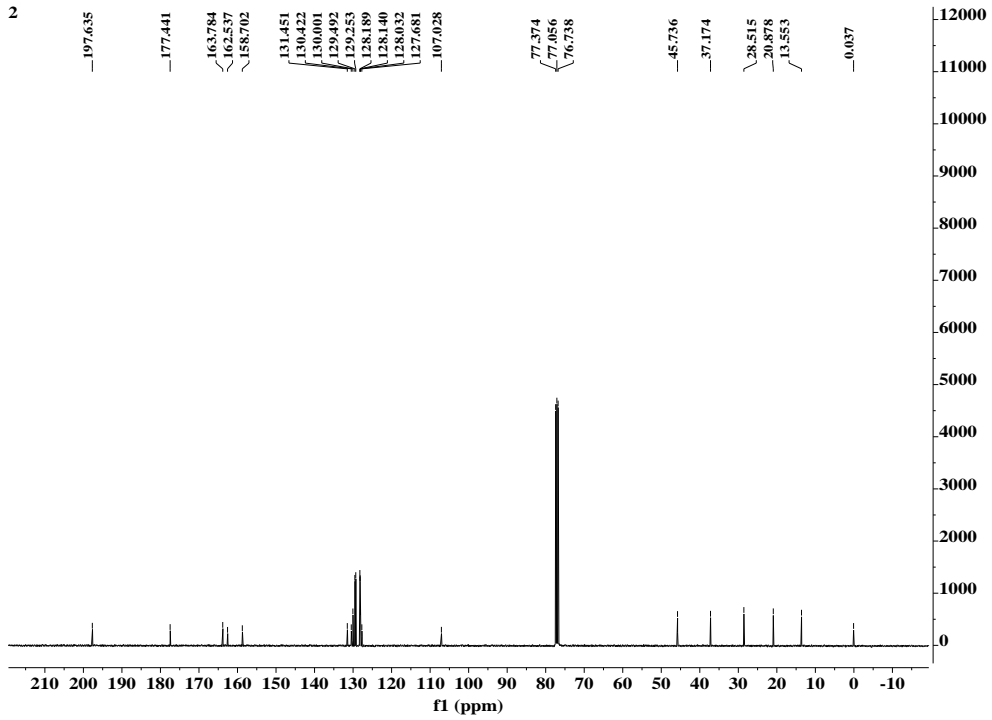

# HRMS

F:\Users\...uying-11\_161110152428

11/10/2016 8:50:48 PM  
Error: 1.3 ppm

11#

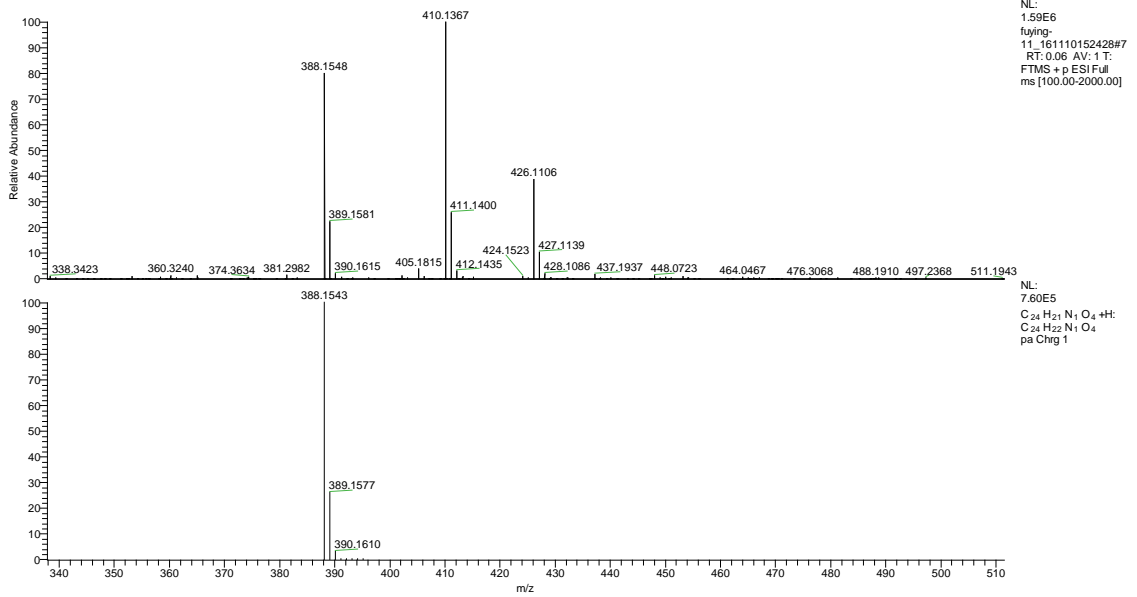

# 3-[5-Methyl-3-phenylisoxazole-4-carboxyloxy]-2-phenyl-5,5-dimethyl-2-cyclohexen-1-one (S22)

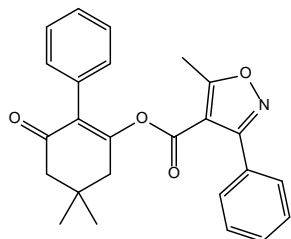

$C_{25}H_{23}NO_4$

IR

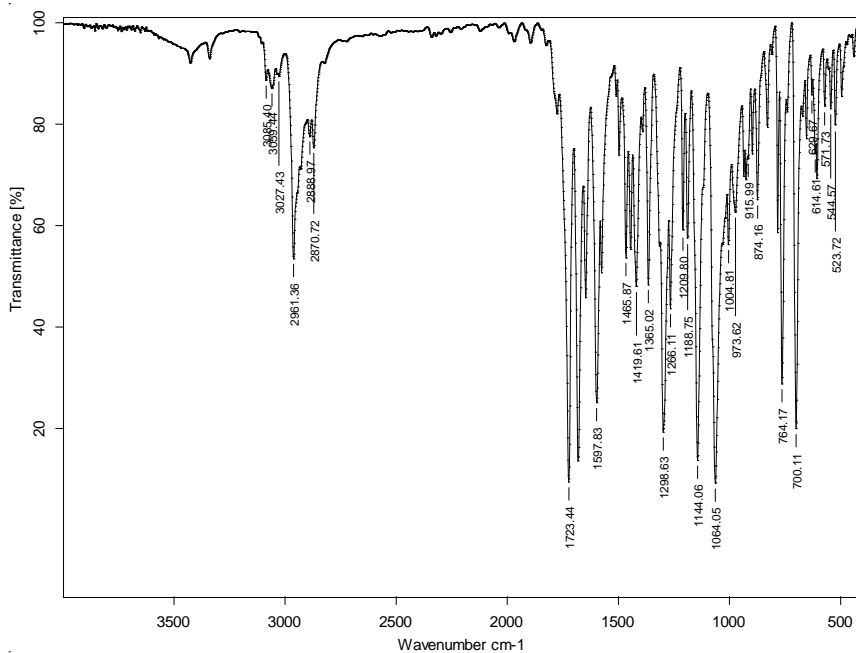

$^1H$  NMR

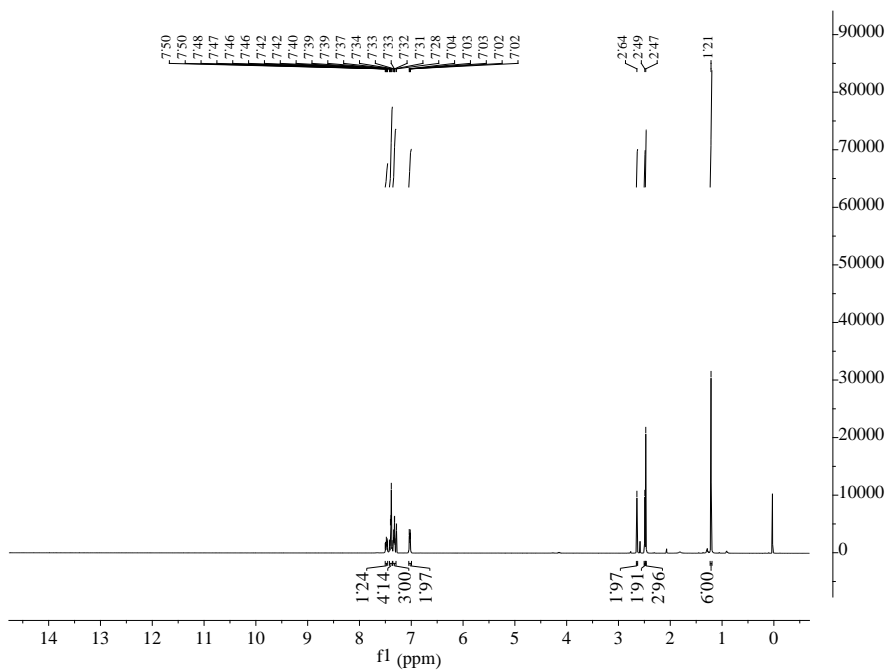

# <sup>13</sup>C NMR

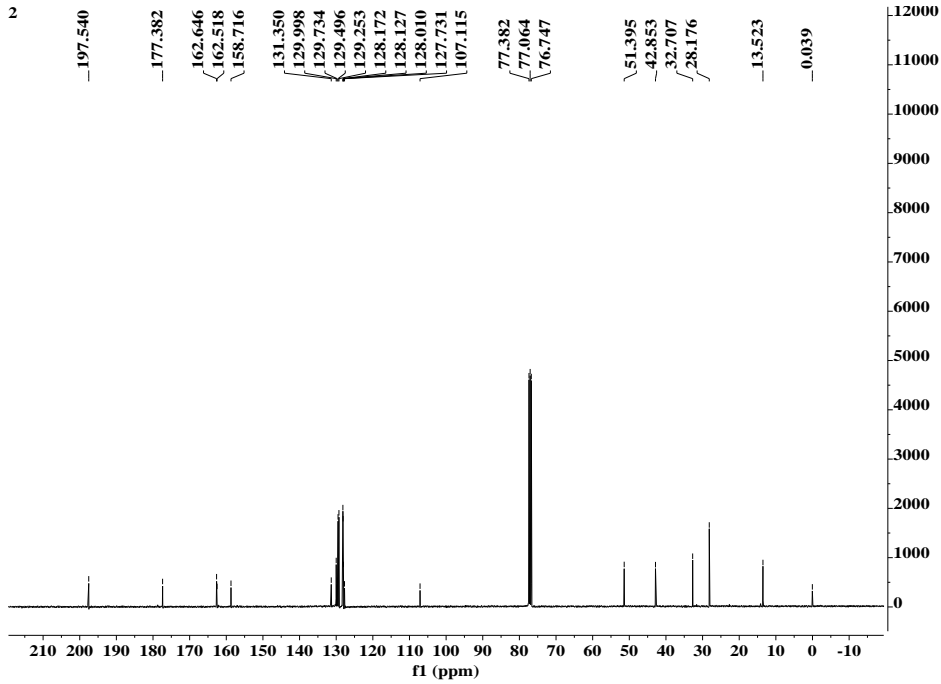

# HRMS

F:\Users\...fuying-10\_161110152428

11/10/2016 8:46:07 PM  
Error=1.2 ppm

10#

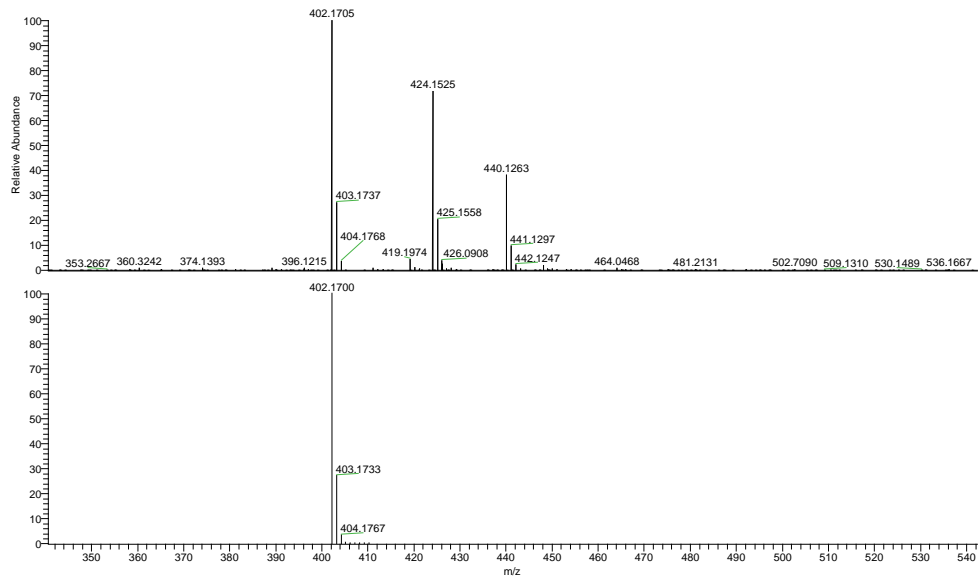

3-[5-Methyl-3-(2-fluoro-6-chlorophenyl)isoxazole-4-carboxyloxy]-2-phenyl-2-cyclohexen-1-one (S23)

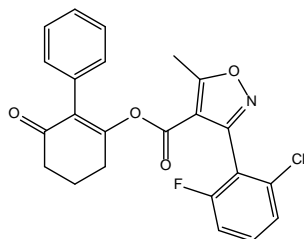

$C_{23}H_{17}ClFNO_4$

IR

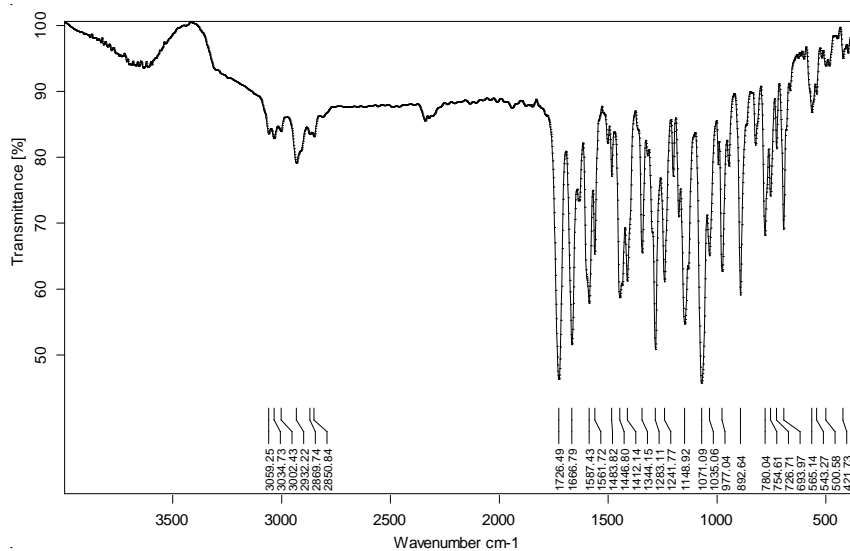

F:\Sample description.29

Sample description

Instrument type and / or accessory

13/03/2017

Page 1/1

<sup>1</sup>H NMR

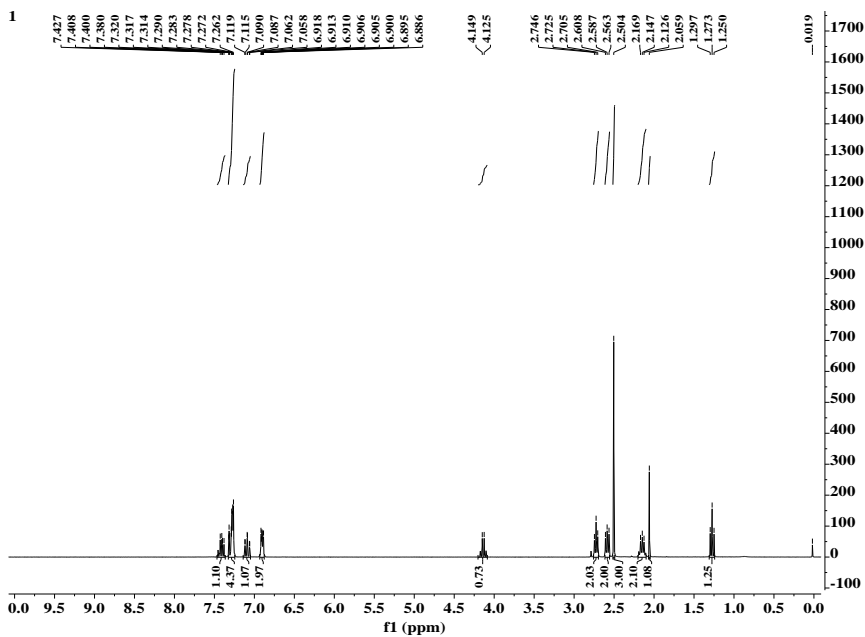

# <sup>13</sup>C NMR

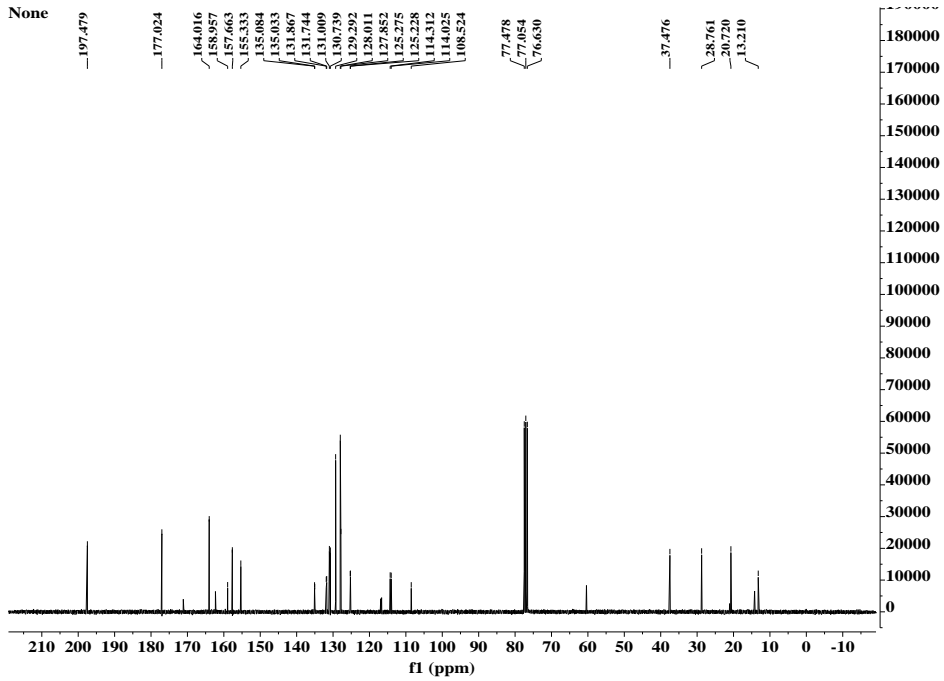

# HRMS

F:\Users\Luying-7\_161110152428

11/10/2016 8:32:58 PM  
Error: 1.6 ppm

7#

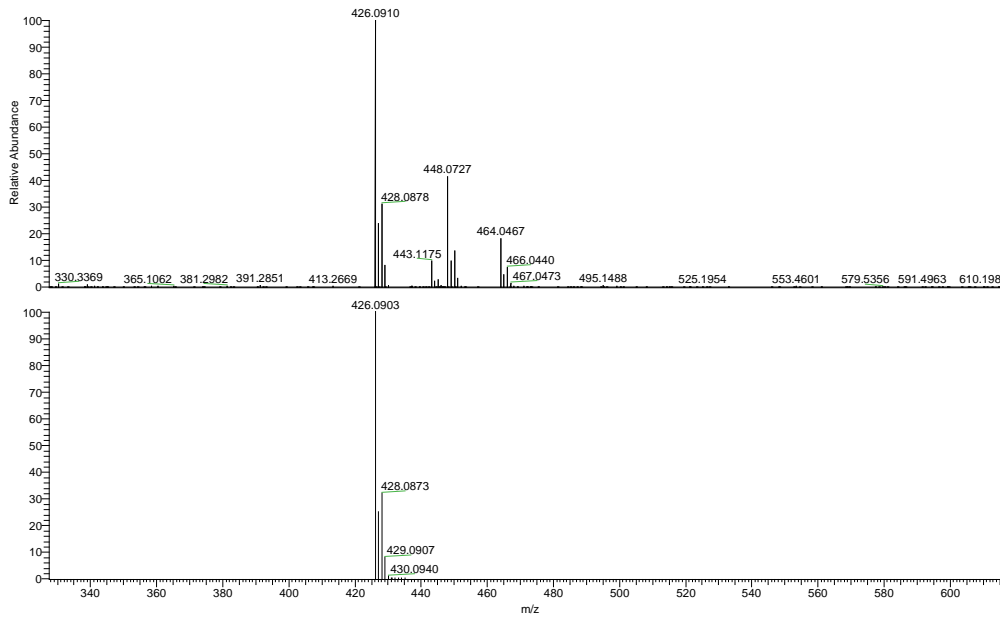

NL:  
7.31E6  
luying-7\_161110152428#3  
RT: 0.01 AV: 1 T: FTMS +  
p ESI Full ms  
[100.00-2000.00]

NL:  
5.83E5  
C<sub>23</sub>H<sub>17</sub>Cl<sub>1</sub>F<sub>1</sub>N<sub>1</sub>O<sub>4</sub>+H:  
C<sub>23</sub>H<sub>18</sub>Cl<sub>1</sub>F<sub>1</sub>N<sub>1</sub>O<sub>4</sub>  
pa Chrg 1

3-[5-Methyl-3-(2-fluoro-6-chlorophenyl)isoxazole-4-carboxyloxy]-2-phenyl-5-methyl-2-cyclohexen-1-one (S24)

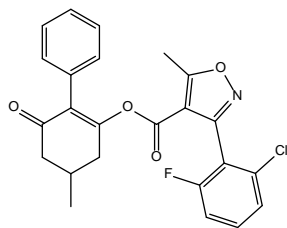

C<sub>24</sub>H<sub>19</sub>ClFNO<sub>4</sub>

IR

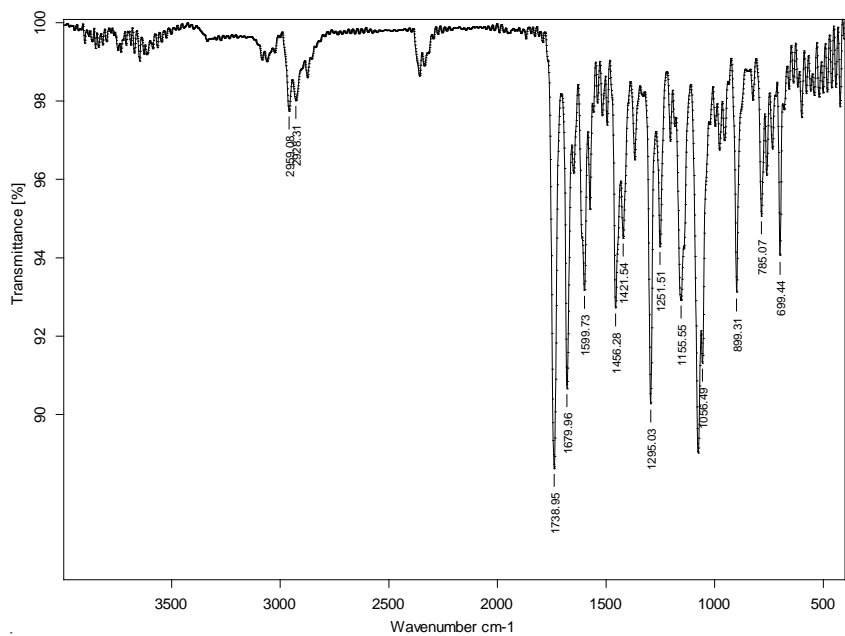

<sup>1</sup>H NMR

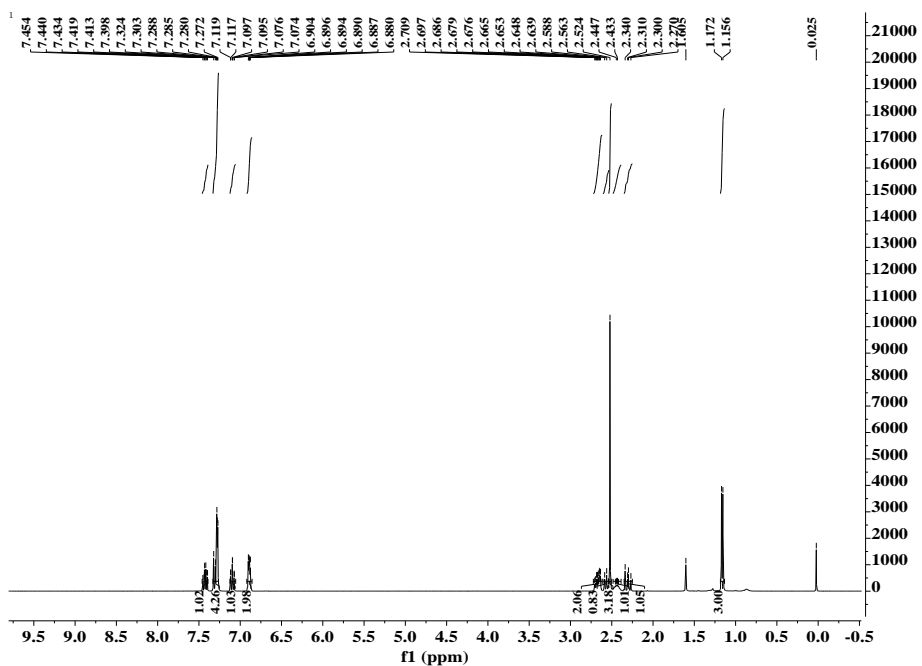

# <sup>13</sup>C NMR

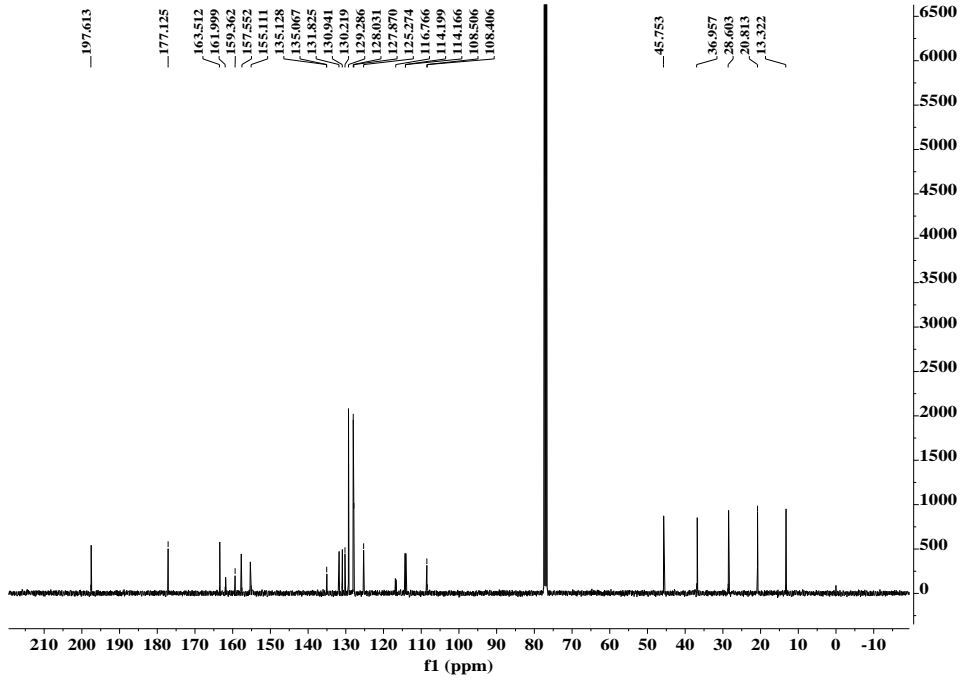

# HRMS

F:\Users\...fuying-14\_161110152428

11/10/2016 9:05:04 PM  
Error=0.9 ppm

14#

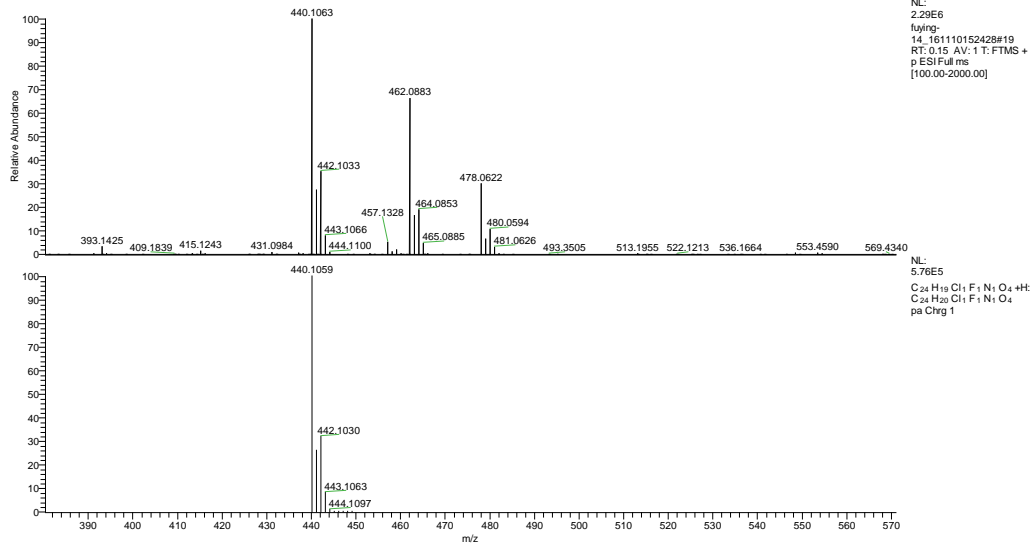

# 3-[5-Methyl-3-(2-fluoro-6-chlorophenyl)isoxazole-4-carboxyloxy]-2-phenyl-5,5-dimethyl-2-cyclohexen-1-one (S25)

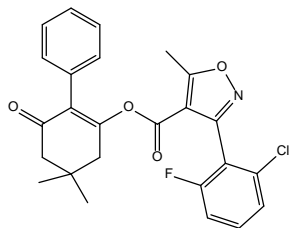

$C_{25}H_{21}ClFNO_4$

IR

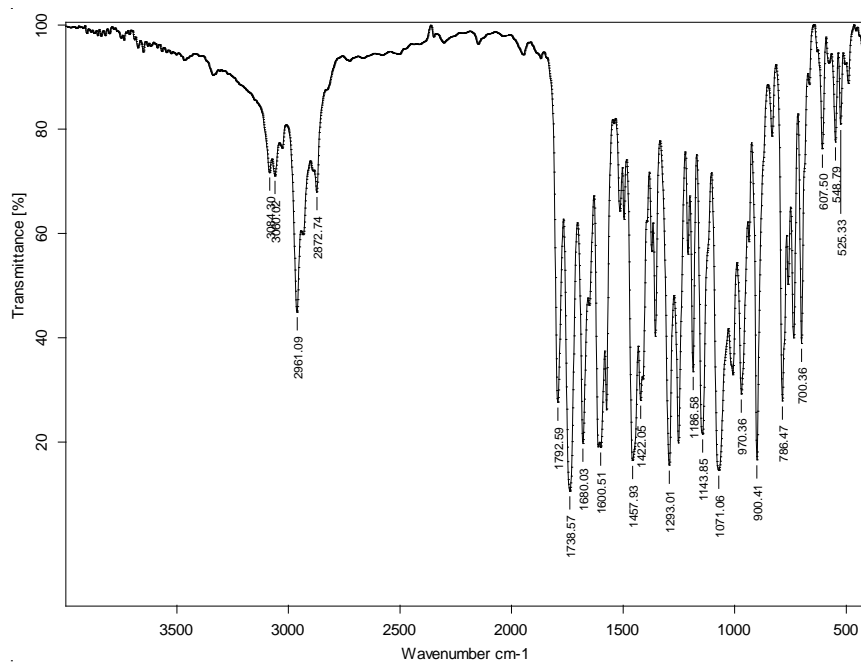

$^1H$  NMR

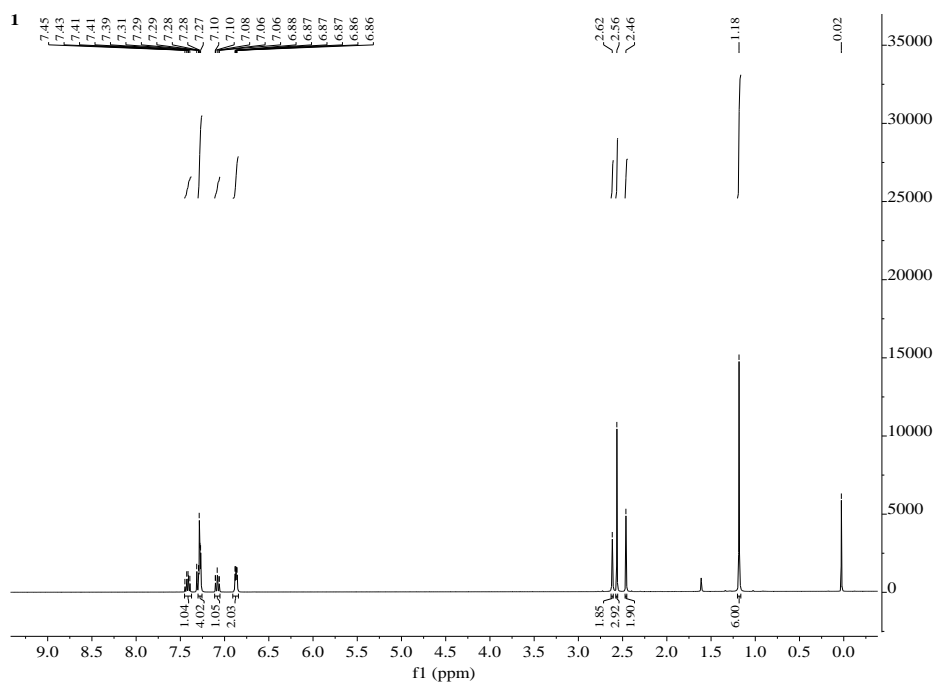



# <sup>13</sup>C NMR

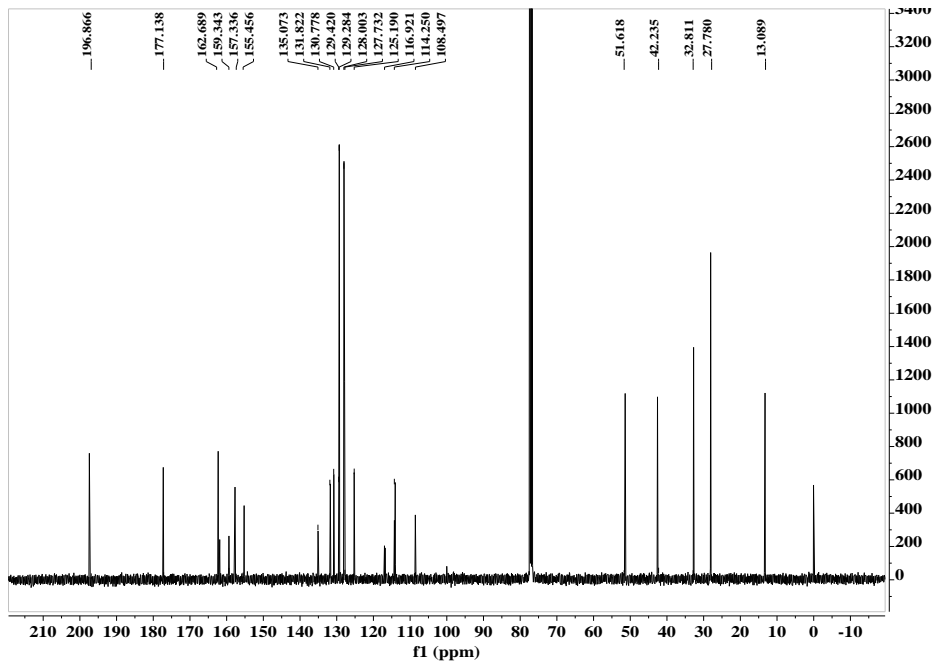

# HRMS

F:\Users\L.Vuying-8\_161110152428

11/10/2016 8:37:11 PM  
Error=0.9 ppm

8#

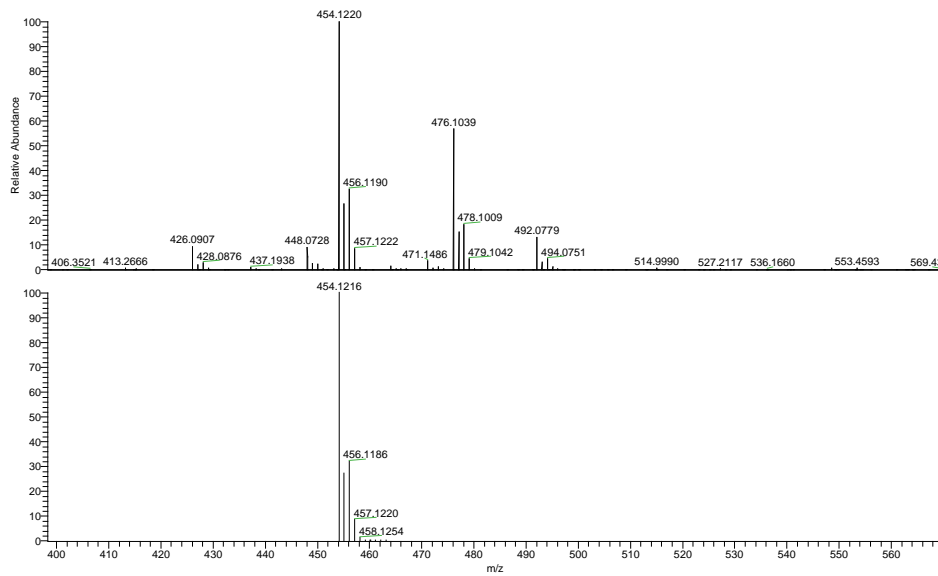

NL:  
1.83E6  
fuying-8\_161110152428#7  
RT: 0.05 AV: 1 T: FTMS +  
p ESI Full.ms  
[100.00-2000.00]

NL:  
5.70E5  
C<sub>25</sub>H<sub>21</sub>Cl<sub>1</sub>F<sub>1</sub>N<sub>1</sub>O<sub>4</sub>+H<sup>+</sup>  
C<sub>25</sub>H<sub>22</sub>Cl<sub>1</sub>F<sub>1</sub>N<sub>1</sub>O<sub>4</sub>  
pa C17g 1

3-[(2-Trifluoromethyl-4-methyl)pyrazoloyloxy]-2-phenyl-2-cyclohexen-1-one  
(S26)

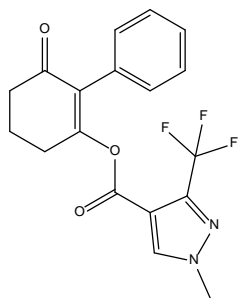

$C_{18}H_{15}F_3N_2O_3$

IR

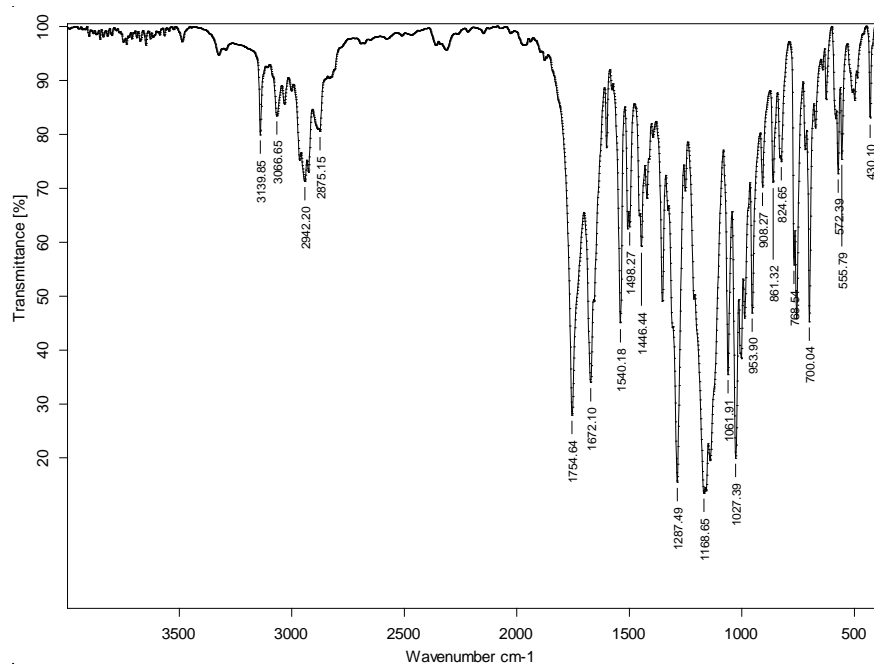

$^1H$  NMR

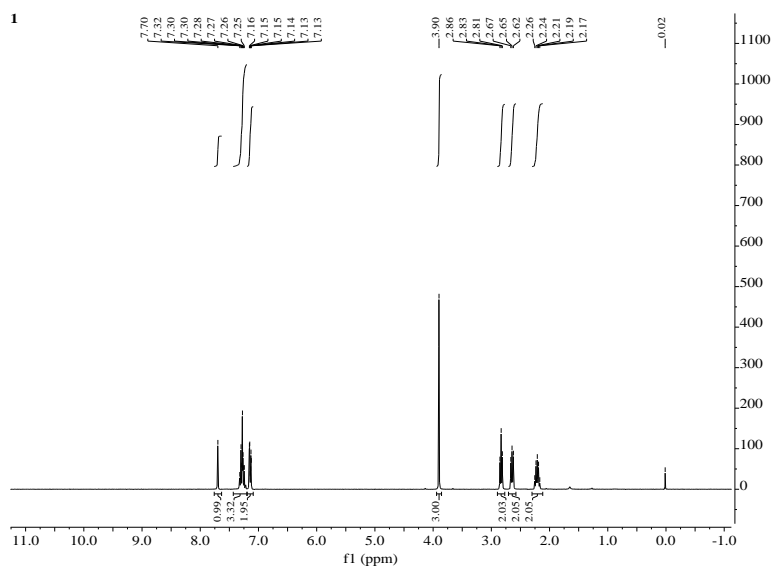

# <sup>13</sup>C NMR

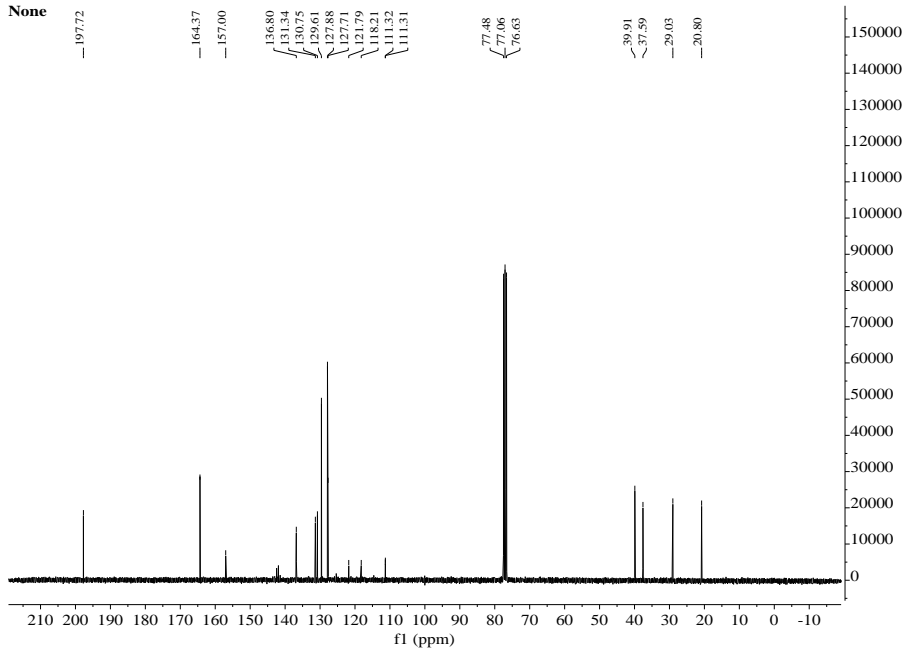

# HRMS

F:\Users\...uying-4\_161110152428

11/10/2016 8:21:52 PM  
Error=1.6 ppm

4#

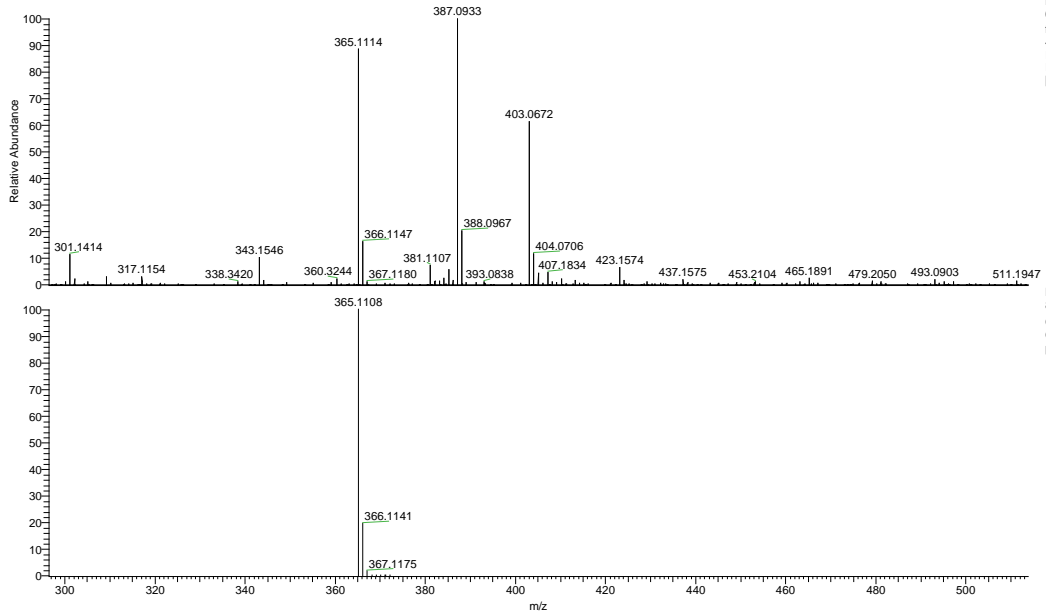

NL:  
6.48E5  
uying-  
4\_161110152428#14  
RT: 0.13 AV: 17  
FTMS + p ESI Full ms  
[100.00-2000.00]

NL:  
8.10E5  
C<sub>18</sub>H<sub>15</sub>F<sub>3</sub>N<sub>2</sub>O<sub>3</sub>+H  
C<sub>18</sub>H<sub>16</sub>F<sub>3</sub>N<sub>2</sub>O<sub>3</sub>  
pa Chrg 1

# 3-[(2-Trifluoromethyl-4-methyl)pyrazoloyloxy]-2-phenyl-5-methyl-2-cyclohexen-1-one (S27)

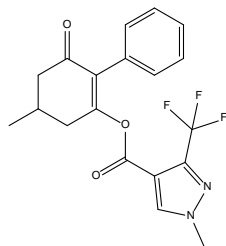

$C_{19}H_{17}F_3N_2O_3$

IR

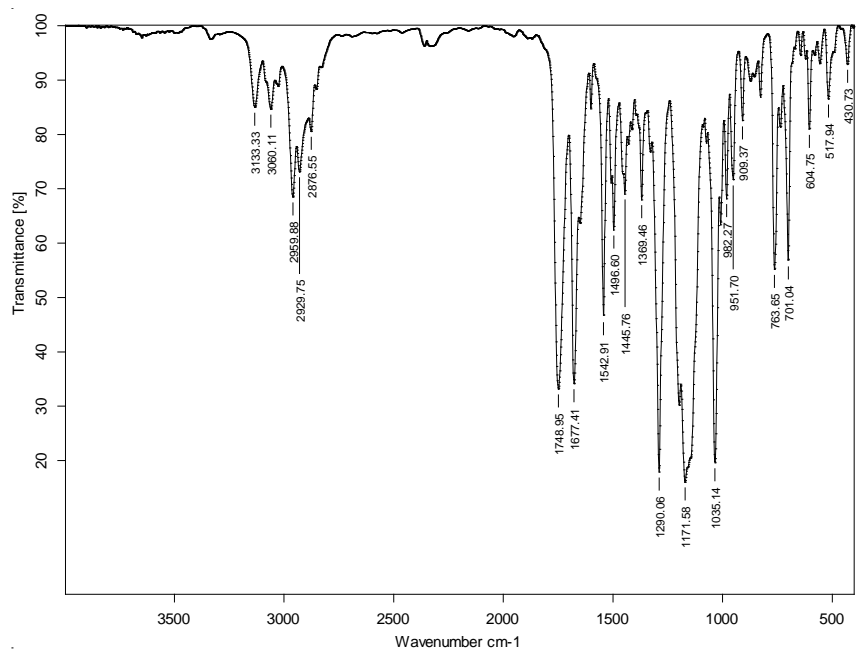

$^1H$  NMR

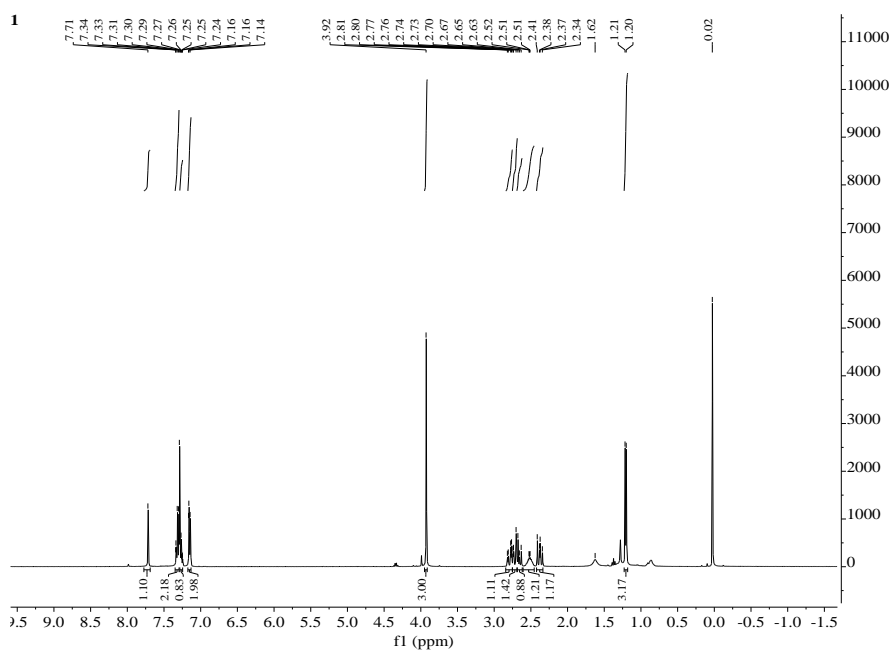

# <sup>13</sup>C NMR

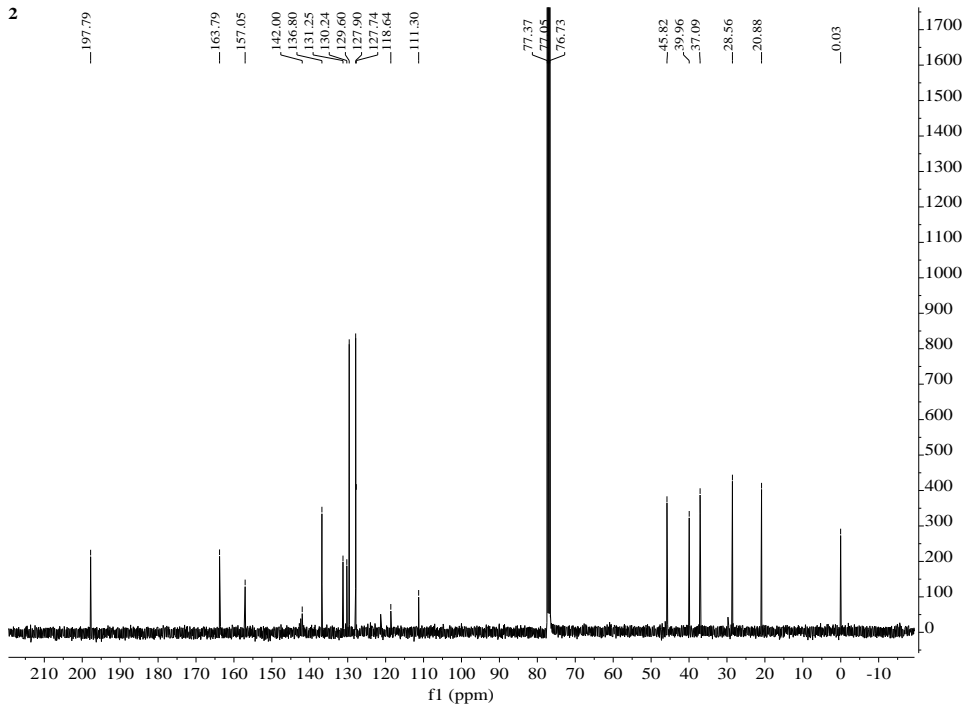

# HRMS

F:\Users\...uying-6\_161110152428

11/10/2016 8:28:49 PM  
Errors=1.3 ppm

6#

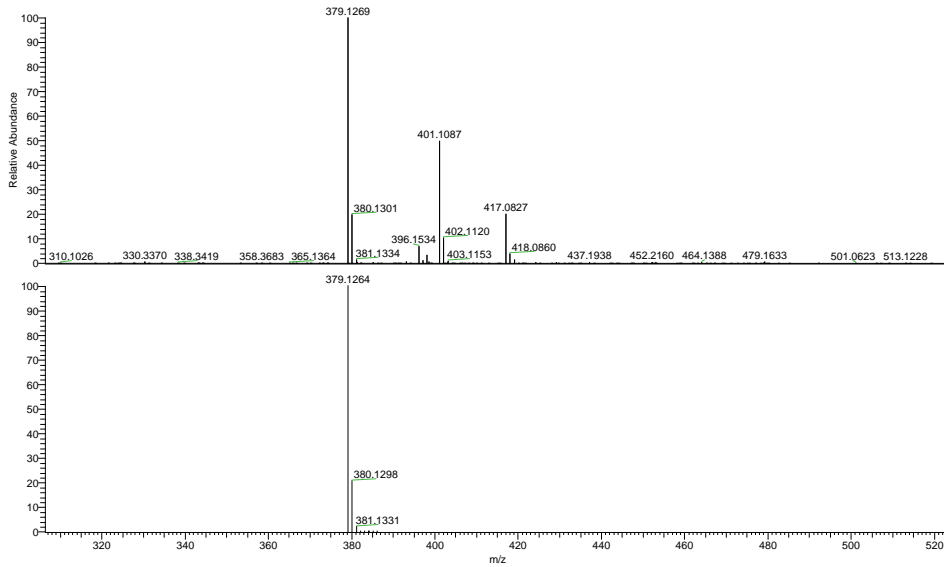

NL:  
8.98E6  
6#  
6\_161110152428#9  
RT: 0.06 AV: 1 T:  
FTMS + p ESI Full ms  
[100.00-2000.00]

NL:  
8.02E5  
C<sub>19</sub>H<sub>17</sub>F<sub>3</sub>N<sub>2</sub>O<sub>3</sub>+H:  
C<sub>19</sub>H<sub>16</sub>F<sub>3</sub>N<sub>2</sub>O<sub>3</sub>  
pa Chrg 1

# 3-[(2-Trifluoromethyl-4-methyl)pyrazoloyloxy]-2-phenyl-5,5-dimethyl-2-cyclohexen-1-one (S28)

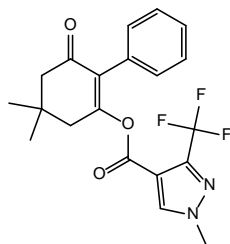

$C_{20}H_{19}F_3N_2O_3$

## IR

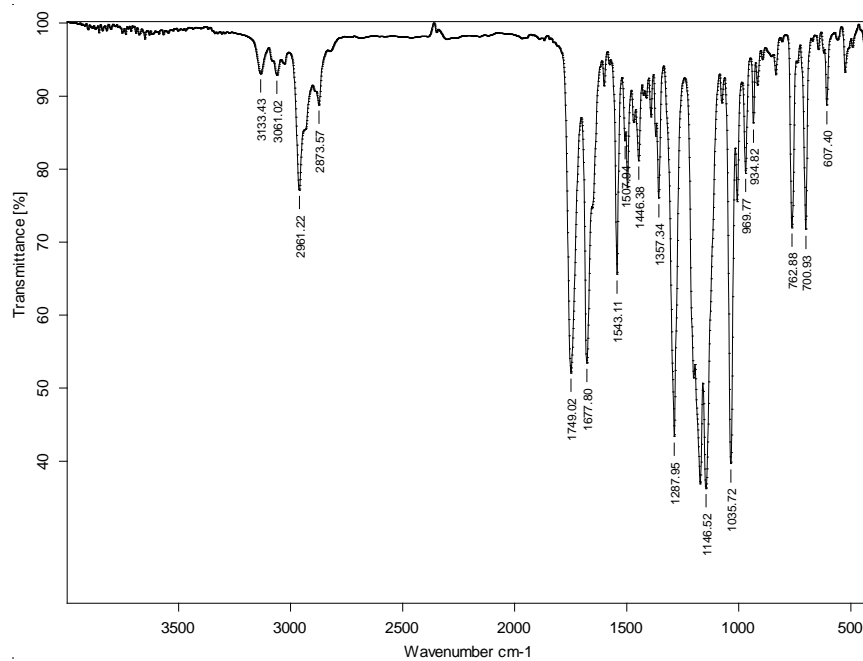

## <sup>1</sup>H NMR

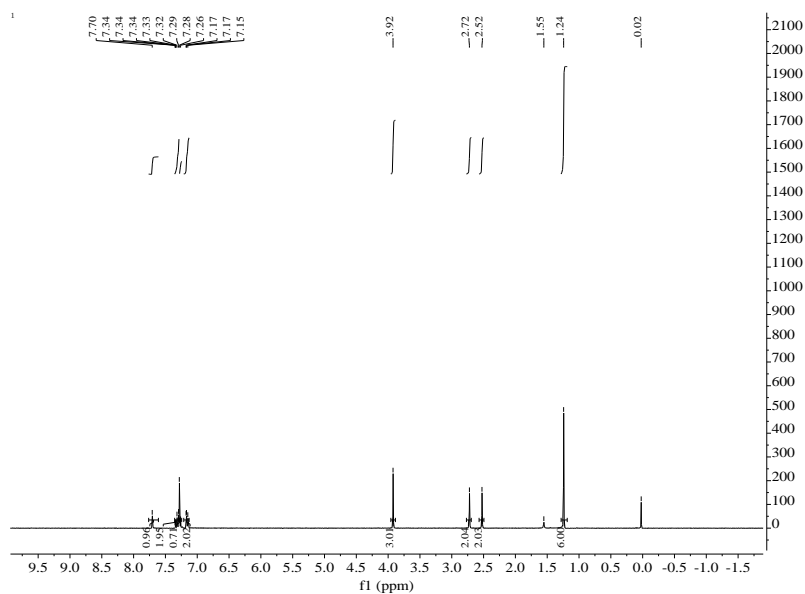

# <sup>13</sup>C NMR

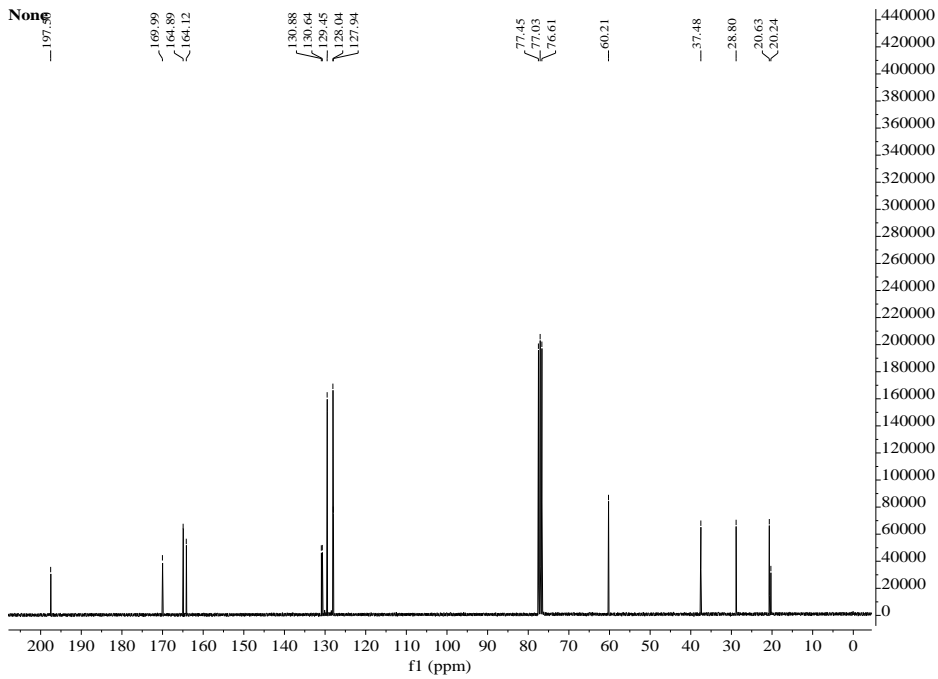

# HRMS

F:\Users\...uying-5\_161110152428

11/10/2016 8:25:31 PM  
Errors:1.0 ppm

5#

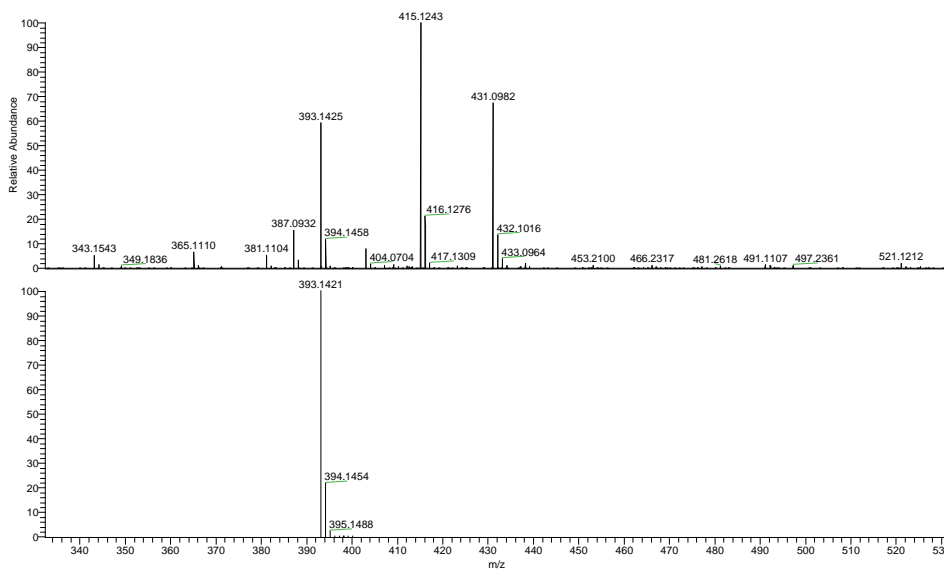

NL: 2.24E6  
10/10/16  
5\_161110152428#4  
RT: 0.02 AV: 1 T  
FTMS + p ESI Full ms  
[100.00-2000.00]

NL: 7.93E5  
C<sub>20</sub>H<sub>19</sub>F<sub>3</sub>N<sub>2</sub>O<sub>3</sub>+H  
C<sub>20</sub>H<sub>20</sub>F<sub>3</sub>N<sub>2</sub>O<sub>3</sub>  
pa Chrg 1
